# Supplementary material
Source: publisher figshare collection journal article supplement (https://acs.figshare.com/ndownloader/files/24697579)
Supplement: Supplementary file 1 [file 24697579]

## **Enantioselective Total Syntheses of Pentacyclic Homoproaporphine Alkaloids**

Liu-Yang Pu, Fan Yang, Ji-Qiang Chen, Ying Xiong, Huai-Yu Bin, Jian-Hua Xie\*, Qi-Lin Zhou,\*

State Key Laboratory and Institute of Elemento-organic Chemistry, College of Chemistry, Nankai University, Tianjin 300071, China

Email: jhxie@nankai.edu.cn; qlzhou@nankai.edu.cn

### **Table of Contents**

|                                                                                           |            |
|-------------------------------------------------------------------------------------------|------------|
| <b>A) General Information.....</b>                                                        | <b>S2</b>  |
| <b>B) Synthesis of Enone Intermediate (+)-11.....</b>                                     | <b>S3</b>  |
| <b>C) Synthesis of Ketone Intermediate (+)-10.....</b>                                    | <b>S9</b>  |
| <b>D) Synthesis of Intermediate (–)-9 and Pentacyclic Homoproaporphine Alkaloids.....</b> | <b>S13</b> |
| <b>E) NMR Spectra of New Compounds and Pentacyclic Homoproaporphine Alkaloids.....</b>    | <b>S22</b> |
| <b>F) HPLC Charts for (–)-13.....</b>                                                     | <b>S45</b> |

#### A) General Information

All reactions and manipulations which are sensitive to moisture or air were performed under inert atmosphere of argon. All chemicals were purchased from J&K, TCI and Aldrich, and were used as received. Tianjin. Petroleum ether (PE) refers to the fraction boiling in the 60–90 °C range. Anhydrous THF, Et<sub>2</sub>O was distilled from sodium benzophenone ketyl. Anhydrous CH<sub>2</sub>Cl<sub>2</sub>, Et<sub>3</sub>N, DMSO and *i*PrOH were distilled from calcium hydride. NMR spectra were recorded on a Bruker AV 400 spectrometer at 400 MHz (<sup>1</sup>H NMR), 101 MHz (<sup>13</sup>C NMR). Chemical shifts were reported in ppm relative to internal TMS for <sup>1</sup>H NMR data, deuterated solvent for <sup>13</sup>C NMR data, respectively. Data are presented in the following space: chemical shift, multiplicity, coupling constant in hertz (Hz), and signal area integration in natural numbers. Optical rotations were determined using a Perkin Elmer 341 polarimeter. HRMS were recorded on APEXII and ZAB-HS spectrometer. High-resolution mass spectra were recorded on an IonSpec FT-ICR mass spectrometer. HPLC analyses were determined using a Hewlett Packard Model HP 1100 Series chromatography.

## B) Synthesis of Enone Intermediate (+)-11

Enone intermediate (+)-11 was synthesized from tricyclic benzofuran (–)-8 by the following procedure.

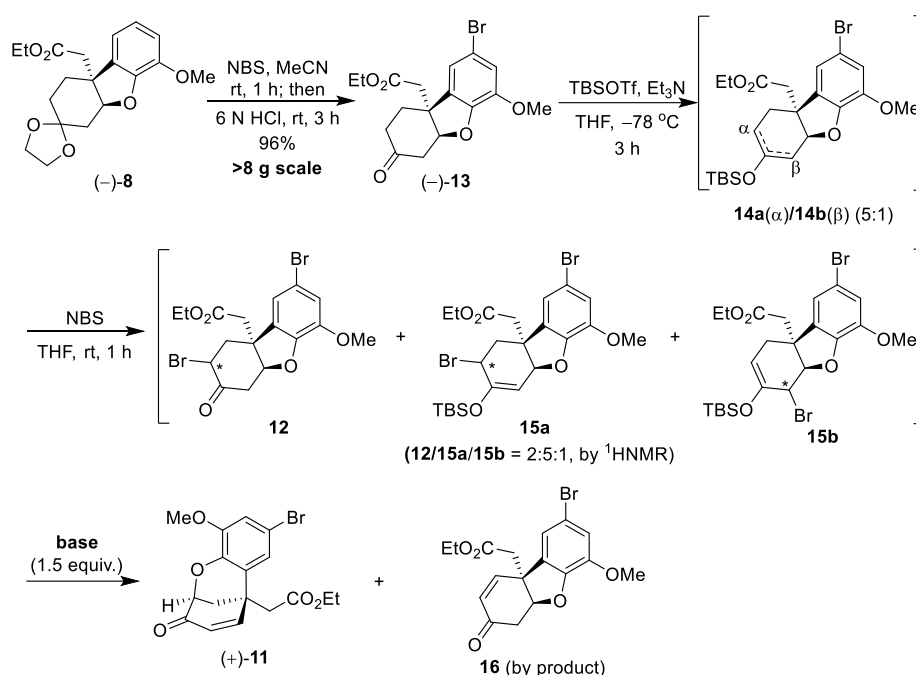

Tricyclic benzofuran (–)-8 was synthesized according to our previously developed method in five steps in around 70% overall yields and 93% ee on a multi-gram scale from commercially available 7-bromo-1,4-dioxaspiro[4.5]decan-8-one and 2-iodo-6-methoxyphenol.<sup>1</sup>

### Synthesis of compound (–)-13

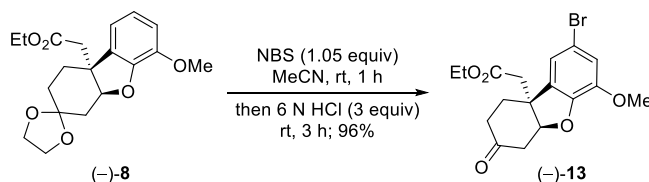

To a solution of compound (–)-8 (8.60 g, 24.7 mmol) in 100 mL MeCN was added NBS (4.76 g, 25.9 mmol) slowly in small portions at room temperature, and the resulting mixture was stirred for 1 h to complete the reaction. Then saturated aqueous solution of  $\text{Na}_2\text{S}_2\text{O}_3$  (20 mL) was added to quench the reaction. Subsequently, aqueous 6N HCl solution (12 mL) was added to the mixture and stirred at room temperature for another 3 h. After neutralization with saturated aqueous  $\text{NaHCO}_3$  solution (150 mL), the mixture was extracted with EtOAc (3 × 60 mL). The combined organic phase was dried over anhydrous  $\text{Na}_2\text{SO}_4$  and concentrated in vacuo. The residue was chromatographed on silica-gel column with petroleum ether/ethyl acetate (3:1) to give the product (–)-13 (8.90 g, 96% yield) as a white solid. 6.70 g white crystal was yielded after recrystallization from  $\text{Et}_2\text{O}$ , 72% recrystallization yield, mp 99–101 °C, 99.5% ee; HPLC conditions: column, Chiralcel OJ-3; eluent, 2-propanol/hexane 20:80; temp, 25 °C; flow rate, 1.0 mL/min; detection, 210 nm light;  $R_f$  0.5 (petroleum ether/ethyl acetate = 2:1);  $[\alpha]_{\text{D}}^{25}$  –162.6 ( $c$  1.0,  $\text{CHCl}_3$ ); IR (KBr):  $\nu_{\text{max}}$  = 2936, 1723, 1616, 1486, 1444, 1202, 1026, 838, 735  $\text{cm}^{-1}$ ;  $^1\text{H NMR}$  (400 MHz,  $\text{CDCl}_3$ )  $\delta$ : 6.88 (d,  $J$  = 1.6 Hz, 1H), 6.86 (d,  $J$  = 1.6 Hz, 1H), 5.26 (t,  $J$  = 3.2 Hz, 1H), 4.14 (q,  $J$  = 7.2 Hz, 2H), 3.84 (s, 3H), 3.03 (dd,  $J$  = 17.2, 3.2 Hz, 1H), 2.97 (dd,  $J$  = 17.2, 3.2 Hz, 1H),

2.86 (d,  $J = 16.0$  Hz, 1H), 2.81 (d,  $J = 16.0$  Hz, 1H), 2.34–2.25 (m, 2H), 1.98–1.87 (m, 2H), 1.24 (t,  $J = 7.2$  Hz, 3H);  $^{13}\text{C}$  NMR (101 MHz,  $\text{CDCl}_3$ )  $\delta$ : 208.4, 170.4, 146.6, 144.9, 133.8, 118.3, 115.5, 112.9, 86.9, 61.0, 56.2, 46.6, 44.2, 42.2, 35.6, 31.2, 14.2; HRMS ( $m/z$ ): calcd for  $\text{C}_{17}\text{H}_{20}\text{BrO}_5$  ( $[\text{M} + \text{H}]^+$ ) 383.0489, found 383.0478.

### Synthesis of enone intermediate (+)-11 in a one-pot procedure

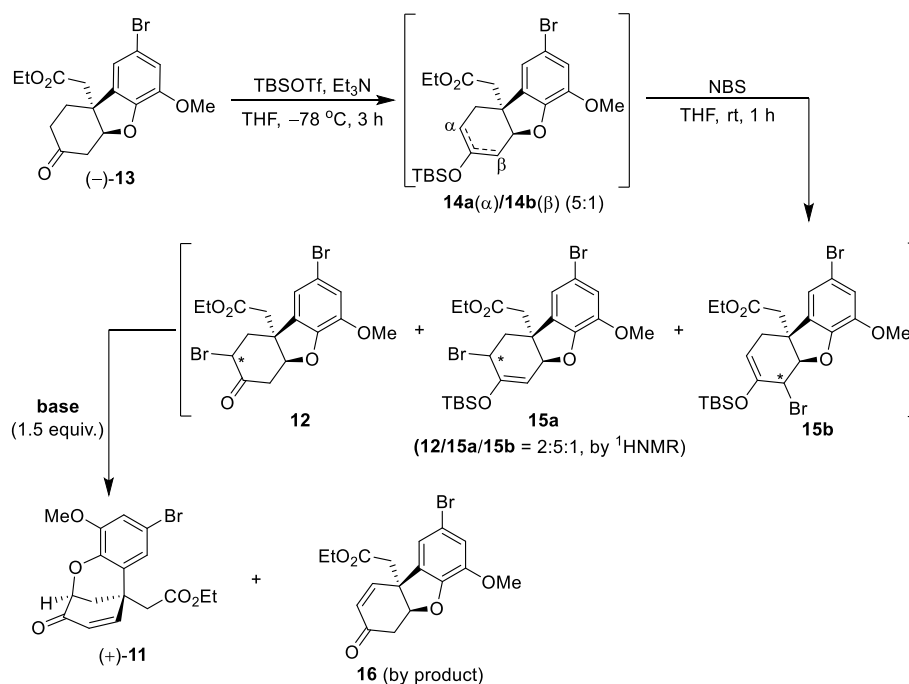

### 1. Screening of the bases

To a solution of compound (-)-13 (0.19 g, 0.50 mmol) in THF (1.5 mL) at  $-78^\circ\text{C}$  was added  $\text{Et}_3\text{N}$  (0.23 mL, 1.70 mmol), then TBSOTf (0.25 mL, 1.10 mmol) was added dropwise within 5 min. The mixture was stirred at  $-78^\circ\text{C}$  for 3 h to complete the reaction and then concentrated in high vacuo. The resulting colorless oil was dissolved in THF (1.5 mL) and treated with a solution of NBS (0.11 g, 0.60 mmol) in THF (1.5 mL) dropwise. The mixture was stirred at room temperature for another 1 h. Then to the mixture was added base (0.80 mmol) in THF (0.80 mL) dropwise. The resulting mixture was stirred at room temperature for 2–20 h and quenched with saturated aqueous  $\text{NaHCO}_3$  solution (5 mL) and extracted with  $\text{Et}_2\text{O}$  ( $3 \times 5$  mL). The combined organic phase was dried over  $\text{Na}_2\text{SO}_4$  and concentrated in vacuo. The residue was purified by column chromatography on silica gel with petroleum ether/ethyl acetate (3:1) to give a mixture of product (+)-11 ( $R_f$  0.37) and by-product 16 ( $R_f$  0.37) as a white solid. The results are summarized in Table S1.



**Table S1.** The results of enantioselective synthesis of (+)-**11** in a one-pot procedure.<sup>a</sup>

| Entry            | Base              | Temp (°C) | Time (h) | (+)- <b>11</b> / <b>16</b> <sup>b</sup> | Yield (%) <sup>c</sup> |
|------------------|-------------------|-----------|----------|-----------------------------------------|------------------------|
| 1                | DBU               | rt        | 15       | 94:6                                    | 58                     |
| 2                | <i>t</i> BuOK     | rt        | 20       | 97:3                                    | 37                     |
| 3                | DABCO             | 50        | 10       | 96:4                                    | 41                     |
| 4                | Et <sub>3</sub> N | 50        | 10       | 99:1                                    | 27                     |
| 5                | TBAF              | rt        | 2        | >99:1                                   | 69                     |
| 6 <sup>[d]</sup> | TBAF              | rt        | 2        | >99:1                                   | 70                     |

<sup>a</sup> Reaction conditions: (–)-**13** (0.19 g, 0.50 mmol), 1.5 equivalent of base.<sup>b</sup> The ratio of (+)-**11** to **16** was determined by <sup>1</sup>H NMR.<sup>c</sup> The yield of (+)-**11** was calculated from the combined isolated yield of (+)-**11** and **16** over 3 steps.<sup>d</sup> Performed on a gram-scale ((–)-**13**, 1.15 g, 3.00 mmol).

## 2. Gram-scale synthesis with TBAF as a base

To a solution of compound (–)-**13** (1.15 g, 3.00 mmol) in THF (9.0 mL) at –78 °C was added Et<sub>3</sub>N (1.37 mL, 9.90 mmol), TBSOTf (1.52 mL, 6.60 mmol) was added dropwise within 15 min. The mixture was stirred at –78 °C for 3 h to complete the reaction and then concentrated in high vacuo. The resulting colorless oil was dissolved in THF (9.0 mL) and treated with a solution of NBS (0.58 g, 3.15 mmol) in THF (9.0 mL) dropwise. The mixture was stirred at room temperature for another 1 h. Then to the mixture was added TBAF (4.70 mL, 4.70 mmol, 1.0 M in THF) dropwise. The resulting mixture was stirred at room temperature for 2 h and quenched with saturated aqueous NaHCO<sub>3</sub> solution (15 mL) and extracted with Et<sub>2</sub>O (3 × 15 mL). The combined organic phase was dried over Na<sub>2</sub>SO<sub>4</sub> and concentrated in vacuo. The residue was purified by column chromatography on silica gel with petroleum ether/ethyl acetate (3:1) to give the product (+)-**11** (0.82 g, 70% yield) as a white solid. mp 77–79 °C; *R*<sub>f</sub> 0.37 (petroleum ether/ethyl acetate = 3:1).

## 3. Treatment of the isolated intermediates **12**, **15a**, and **15b** with TBAF

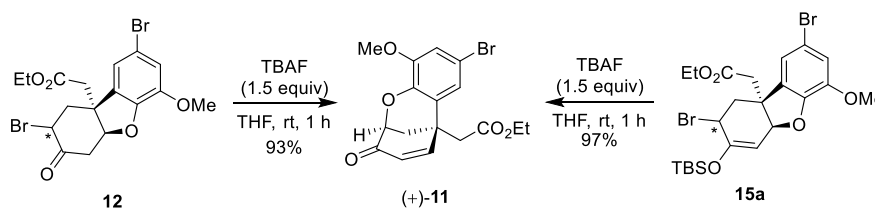

**General procedure:** To a solution of the isolated bromide intermediate (27.0 μmol) THF (0.20 mL) was added TBAF (40.0 μL, 40.0 μmol, 1.0 M in THF) was added dropwise. The resulting mixture was stirred at room temperature for 1 h and quenched with saturated aqueous NaHCO<sub>3</sub> solution (3 mL) and extracted with Et<sub>2</sub>O (3 × 3 mL). The combined organic phase was dried over Na<sub>2</sub>SO<sub>4</sub> and concentrated in vacuo. The residue was purified by column chromatography on silica gel with petroleum ether/ethyl acetate (3:1) to give the product as a white solid.

For intermediate **12**, the product (+)-**11** (9.6 mg) was obtained in 93% yield.

For intermediate **15a**, the product (+)-**11** (10.0 mg) was obtained in 97% yield.

For intermediate **15b**, only complex mixtures without any detectable (+)-**11** were obtained.

The data of the isolated intermediates (**14**, **12**, **15a**, and **15b**) and product (+)-**11** as below:

**14a/14b** (5:1): colorless oil ( $R_f$  0.63, petroleum ether/ethyl acetate = 20:1).  $^1\text{H}$  NMR (400 MHz,  $\text{CDCl}_3$ )  $\delta$ : 6.91 (d,  $J$  = 1.6 Hz, 0.17H), 6.86 (d,  $J$  = 1.6 Hz, 0.17H), 6.82 (d,  $J$  = 2.0 Hz, 0.83H), 6.81 (d,  $J$  = 2.0 Hz, 0.83H), 5.24 (d,  $J$  = 4.0 Hz, 0.17H), 5.18 (dd,  $J$  = 4.8, 3.2 Hz, 0.83H), 4.98 (d,  $J$  = 4.0 Hz, 0.17H), 4.74–4.70 (m, 0.83H), 4.10 (q,  $J$  = 7.2 Hz, 0.34H), 4.09 (q,  $J$  = 7.2 Hz, 1.66H), 3.84 (s, 0.51H), 3.82 (s, 2.49H), 2.69 (s, 1.66H), 2.63 (dd,  $J$  = 16.0, 4.8 Hz, 1H), 2.57 (d,  $J$  = 5.6 Hz, 0.34H), 2.51 (dd,  $J$  = 16.0, 3.2 Hz, 1H), 2.36 (dd,  $J$  = 15.2, 3.2 Hz, 1H), 2.27 (dd,  $J$  = 15.2, 2.4 Hz, 1H), 2.15–1.93 (m, 1H), 1.21 (t,  $J$  = 7.2 Hz, 0.51H), 1.20 (t,  $J$  = 7.2 Hz, 2.49H), 0.89–0.84 (m, 9H), 0.11–0.00 (m, 6H);  $^{13}\text{C}$  NMR (101 MHz,  $\text{CDCl}_3$ )  $\delta$ : 170.7, 170.5, 156.8, 150.3, 147.4, 146.3, 145.8, 144.6, 136.1, 135.0, 118.7, 118.3, 118.0, 115.0, 114.6, 111.8, 101.3, 100.2, 89.0, 86.8, 60.6, 56.2, 56.1, 48.3, 45.6, 44.2, 42.1, 34.9, 33.4, 29.2, 26.8, 25.6, 18.0, 14.1, –4.5(2), –4.6, –4.9; HRMS ( $m/z$ ): calcd for  $\text{C}_{23}\text{H}_{34}\text{BrO}_5\text{Si}$  ( $[\text{M} + \text{H}]^+$ ) 498.5085, found 498.5082.

**12** (unstable, with minor isomers or other impurities): yellow oil ( $R_f$  0.4, petroleum ether/ethyl acetate = 3:1).  $^1\text{H}$  NMR (400 MHz,  $\text{CDCl}_3$ )  $\delta$ : 6.93 (d,  $J$  = 1.6 Hz, 1H), 6.91 (d,  $J$  = 1.6 Hz, 1H), 5.24 (t,  $J$  = 3.2 Hz, 1H), 4.16 (q,  $J$  = 7.2 Hz, 2H), 4.11 (dd,  $J$  = 14.0, 4.8 Hz, 1H), 3.85 (s, 3H), 3.27 (dd,  $J$  = 15.6, 3.2 Hz, 1H), 3.17 (dd,  $J$  = 15.6, 3.2 Hz, 1H), 2.90 (d,  $J$  = 16.4 Hz, 1H), 2.81 (d,  $J$  = 16.4 Hz, 1H), 2.77 (t,  $J$  = 14.0 Hz, 1H), 2.48 (dd,  $J$  = 15.6, 4.8 Hz, 1H), 1.26 (t,  $J$  = 7.2 Hz, 3H);  $^{13}\text{C}$  NMR (101 MHz,  $\text{CDCl}_3$ )  $\delta$ : 200.6, 170.2, 146.2, 145.2, 132.8, 118.3, 116.0, 113.7, 86.4, 61.3, 56.4, 48.5, 46.9, 43.6, 42.6, 41.5, 14.2; HRMS ( $m/z$ ): calcd for  $\text{C}_{17}\text{H}_{19}\text{Br}_2\text{O}_5$  ( $[\text{M} + \text{H}]^+$ ) 463.1415, found 463.1412.

**15a**: yellow oil ( $R_f$  0.6, petroleum ether/ethyl acetate = 20:1).  $^1\text{H}$  NMR (400 MHz,  $\text{CDCl}_3$ )  $\delta$ : 7.02 (d,  $J$  = 2.0 Hz, 1H), 6.88 (d,  $J$  = 2.0 Hz, 1H), 5.31 (dd,  $J$  = 4.4, 0.8 Hz, 1H), 5.11 (dd,  $J$  = 4.4, 0.8 Hz, 1H), 4.47 (t,  $J$  = 6.0 Hz, 1H), 4.17–4.07 (m, 2H), 3.84 (s, 3H), 2.82 (d,  $J$  = 16.0 Hz, 1H), 2.74 (d,  $J$  = 16.0 Hz, 1H), 2.69 (d,  $J$  = 6.0 Hz, 2H), 1.21 (t,  $J$  = 7.2 Hz, 3H), 0.91 (s, 9H), 0.18 (s, 3H), 0.10 (s, 3H);  $^{13}\text{C}$  NMR (101 MHz,  $\text{CDCl}_3$ )  $\delta$ : 170.2, 153.3, 145.8, 145.7, 134.5, 118.8, 115.3, 112.6, 102.9, 85.6, 60.7, 56.2, 45.9, 44.7, 41.5, 38.8, 25.5, 18.2, 14.2, –4.7, –4.8; HRMS ( $m/z$ ): calcd for  $\text{C}_{23}\text{H}_{33}\text{Br}_2\text{O}_5\text{Si}$  ( $[\text{M} + \text{H}]^+$ ) 577.4045, found 577.4038.

**15b**: yellow oil ( $R_f$  0.65, petroleum ether/ethyl acetate = 20:1).  $^1\text{H}$  NMR (400 MHz,  $\text{CDCl}_3$ )  $\delta$ : 6.86 (d,  $J$  = 1.6 Hz, 1H), 6.82 (d,  $J$  = 1.6 Hz, 1H), 5.49 (d,  $J$  = 2.0 Hz, 1H), 4.93 (d,  $J$  = 7.6 Hz, 1H), 4.58–4.53 (m, 1H), 4.09–4.01 (m, 2H), 3.82 (s, 3H), 2.85 (s, 2H), 2.64 (dd,  $J$  = 15.6, 2.8 Hz, 1H), 2.54 (dd,  $J$  = 15.6, 7.6 Hz, 1H), 1.13 (t,  $J$  = 7.2 Hz, 3H), 0.88 (s, 9H), 0.06 (s, 3H), 0.03 (s, 3H);  $^{13}\text{C}$  NMR (101 MHz,  $\text{CDCl}_3$ )  $\delta$ : 169.8, 150.5, 146.8, 144.2, 135.1, 118.1, 115.0, 112.4, 106.0, 91.5, 60.7, 56.1, 48.2, 46.8, 46.0, 33.9, 25.6, 18.0, 14.0, –4.7, –4.8; HRMS ( $m/z$ ): calcd for  $\text{C}_{23}\text{H}_{33}\text{Br}_2\text{O}_5\text{Si}$  ( $[\text{M} + \text{H}]^+$ ) 577.4045, found 577.4040.

(+)-**11**: a white solid ( $R_f$  0.37, petroleum ether/ethyl acetate = 3:1). mp 76–79 °C;  $[\alpha]_D^{25}$  +250.0 ( $c$  0.1,  $\text{CHCl}_3$ ); IR (KBr):  $\nu_{\text{max}}$  = 2978, 2939, 1729, 1688, 1573, 1472, 1445, 1268, 1207, 1037, 860, 822  $\text{cm}^{-1}$ ;  $^1\text{H}$  NMR (400 MHz,  $\text{CDCl}_3$ )  $\delta$ : 7.01 (dd,  $J$  = 10.0, 2.0 Hz, 1H), 6.95 (s, 2H), 6.14 (dd,  $J$  = 10.0, 0.8 Hz, 1H), 4.88–4.85 (m, 1H), 4.17 (q,  $J$  = 7.2 Hz, 2H), 3.84 (s, 3H), 3.17 (d,  $J$  = 15.2 Hz, 1H), 2.81 (d,  $J$  = 15.2 Hz, 1H), 2.59 (dd,  $J$  = 13.6, 1.6 Hz, 1H), 2.35 (ddd,  $J$  = 13.6, 4.0, 2.4 Hz, 1H), 1.27 (t,  $J$  = 7.2 Hz, 3H);  $^{13}\text{C}$  NMR (101 MHz,  $\text{CDCl}_3$ )  $\delta$ : 191.2, 169.8, 156.9, 149.7, 141.1, 127.5, 126.3, 118.5, 114.6, 112.5, 74.9, 61.1, 56.3, 41.2, 35.1, 32.6, 14.2; HRMS ( $m/z$ ): calcd for  $\text{C}_{17}\text{H}_{18}\text{BrO}_5$  ( $[\text{M} + \text{H}]^+$ ) 381.0332, found 381.0334.

The ratio of **14a/14b** was determined by  $^1\text{H}$  NMR and varied over time.

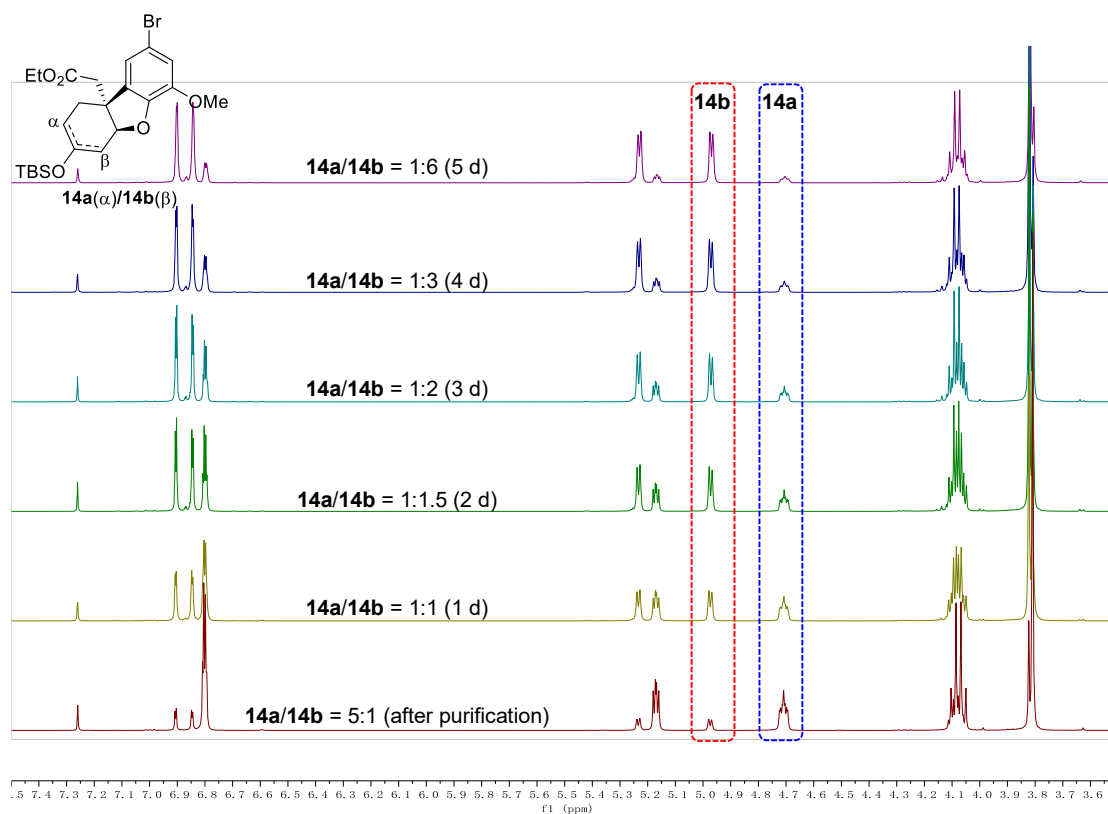

The ratio of **12/15a/15b** was determined by  $^1\text{H}$  NMR.

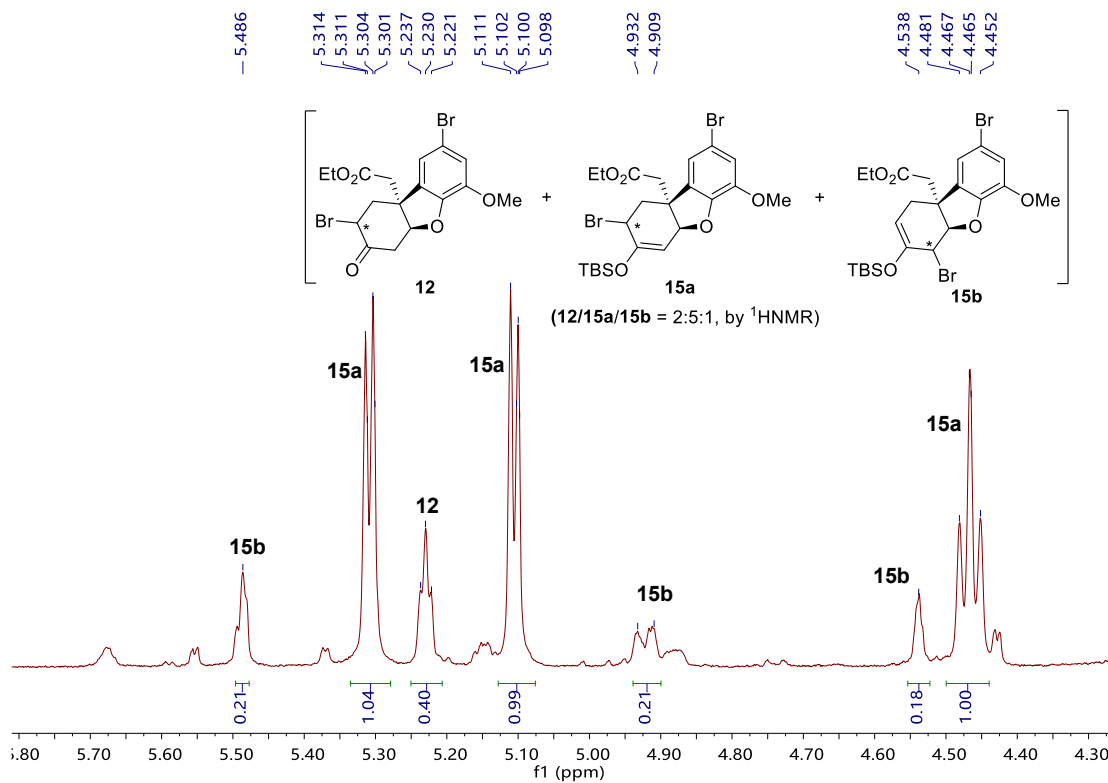

### Synthesis of enone intermediate (+)-11 from purified intermediates

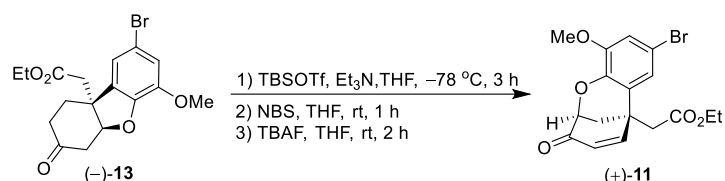

To a solution of compound (-)-13 (5.90 g, 15.4 mmol) in THF (77 mL) at  $-78^\circ\text{C}$  was added  $\text{Et}_3\text{N}$  (7.03 mL, 50.8 mmol), and TBSOTf (7.78 mL, 33.9 mmol) was added dropwise within 10 min. The mixture was stirred at  $-78^\circ\text{C}$  for 3 h to complete the reaction. Water (50 mL) was added to quench the reaction and the mixture was extracted with  $\text{Et}_2\text{O}$  ( $3 \times 40$  mL). The combined organic phase was dried over  $\text{Na}_2\text{SO}_4$  and concentrated in vacuo. The residue was flash chromatographed on silica-gel with petroleum ether/ethyl acetate (3:1) to give a colorless oil. The colorless oil was re-dissolved in THF (60 mL) and cooled to  $0^\circ\text{C}$  with an ice-bath. A solution of NBS (2.97 g, 16.2 mmol) in THF (80 mL) was then added dropwise at  $0^\circ\text{C}$ , and the resulting reaction mixture was stirred at room temperature for another 1 h. The reaction mixture was then quenched with saturated aqueous  $\text{Na}_2\text{S}_2\text{O}_3$  solution (50 mL) and extracted with  $\text{Et}_2\text{O}$  ( $3 \times 50$  mL). The combined organic phase was dried over  $\text{Na}_2\text{SO}_4$  and concentrated in vacuo. The residue was flash chromatographed on a silica-gel column with petroleum ether/ethyl acetate (3:1) to give a yellow oil. The yellow oil was re-dissolved in THF (60 mL), and TBAF (23.1 mL, 23.1 mmol, 1.0 M in THF) was added dropwise. The resulting mixture was stirred at room temperature for 2 h and quenched with saturated aqueous  $\text{NaHCO}_3$  solution (30 mL) and extracted with  $\text{Et}_2\text{O}$  ( $3 \times 60$  mL). The combined organic phase was dried over  $\text{Na}_2\text{SO}_4$  and concentrated in vacuo. The residue was purified by column chromatography on silica gel (petroleum ether/ethyl acetate, 3:1) to give the product (+)-11 (5.05 g, 86% yield) as a white solid.

### C) Enantioselective Synthesis of Ketone Intermediate (+)-10

The ketone intermediate (+)-10 was synthesized by the following procedure.

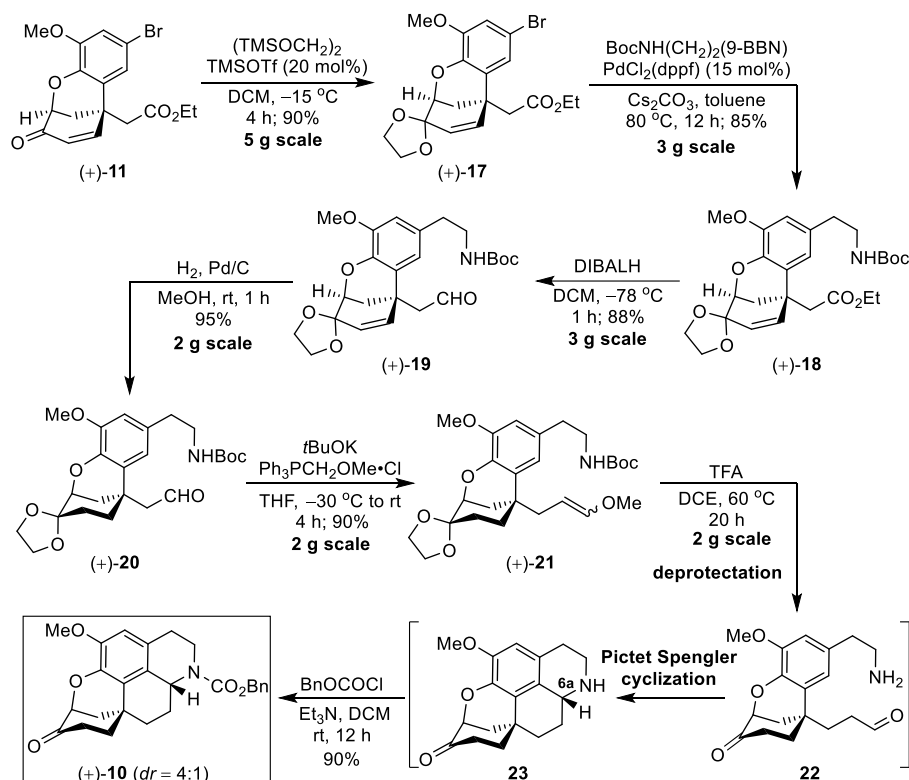

### Synthesis of compound (+)-17

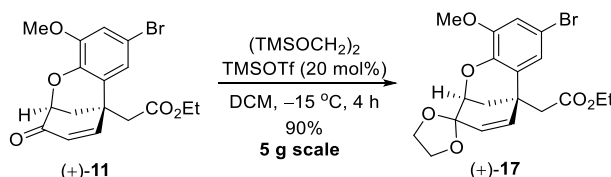

To a solution of compound (+)-11 (5.20 g, 13.6 mmol) and 2,2,7,7-tetramethyl-3,6-dioxa-2,7-disilaoctane (10.0 mL, 40.9 mmol) in  $\text{CH}_2\text{Cl}_2$  (60 mL) was added TMSOTf (0.49 mL, 2.73 mmol) dropwise at  $-15^\circ\text{C}$ . The mixture was stirred at the same temperature for 4 h, quenched with saturated aqueous  $\text{NaHCO}_3$  solution (40 mL), and extracted with  $\text{CH}_2\text{Cl}_2$  ( $3 \times 40$  mL). The combined organic phase was dried over anhydrous  $\text{Na}_2\text{SO}_4$  and concentrated in vacuo. The residue was chromatographed on silica-gel column with petroleum ether/ethyl acetate (2:1) to give the product (+)-17 (5.20 g, 90% yield) as a white solid: mp  $45\text{--}47^\circ\text{C}$ ;  $R_f$  0.5 (petroleum ether/ethyl acetate = 1:1);  $[\alpha]_{\text{D}}^{25} +175.8$  ( $c$  1.0,  $\text{CHCl}_3$ ); IR (KBr):  $\nu_{\text{max}} = 2979, 2940, 2891, 1731, 1574, 1475, 1445, 1416, 1265, 1212, 1149, 1122, 1016, 993, 842\text{ cm}^{-1}$ ;  $^1\text{H}$  NMR (400 MHz,  $\text{CDCl}_3$ )  $\delta$ : 6.86 (d,  $J = 2.0$  Hz, 1H), 6.85 (d,  $J = 2.0$  Hz, 1H), 5.85 (dd,  $J = 9.6, 1.6$  Hz, 1H), 5.58 (dd,  $J = 9.6, 1.6$  Hz, 1H), 4.54–4.50 (m, 1H), 4.27–4.20 (m, 1H), 4.18–4.12 (m, 2H), 4.10–4.03 (m, 2H), 3.96–3.88 (m, 1H), 3.83 (s, 3H), 2.95 (d,  $J = 14.8$  Hz, 1H), 2.79 (d,  $J = 14.8$  Hz, 1H), 2.56 (d,  $J = 13.2$  Hz, 1H), 2.21 (ddd,  $J = 13.2, 4.8, 2.0$  Hz, 1H), 1.25 (t,  $J = 7.2$  Hz, 3H);  $^{13}\text{C}$  NMR (101 MHz,  $\text{CDCl}_3$ )  $\delta$ : 170.1, 149.1, 141.2, 138.7, 129.0, 125.6, 117.8, 113.5, 111.5, 104.3, 74.0, 65.8, 65.4, 60.7, 56.1, 41.1, 34.5, 30.8, 14.2; HRMS ( $m/z$ ): calcd for  $\text{C}_{19}\text{H}_{21}\text{BrNaO}_6$  ( $[\text{M} + \text{Na}]^+$ ) 447.0414, found 447.0419.

### Synthesis of compound (+)-18

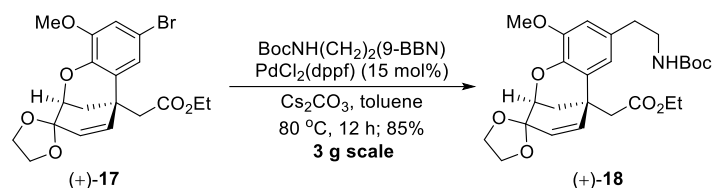

The mixture of compound (+)-17 (3.50 g, 8.23 mmol),  $\text{PdCl}_2(\text{dppf}) \cdot \text{CH}_2\text{Cl}_2$  (1.00 g, 1.23 mmol), and was dissolved in toluene (35 mL). A solution of  $\text{Cs}_2\text{CO}_3$  (8.04 g, 24.7 mmol) in  $\text{H}_2\text{O}$  (8 mL) and a solution of  $\text{BocNH(CH}_2\text{)}_2\text{(9-BBN)}$ , which was generated by *in situ* by the reaction of *tert*-butyl vinylcarbamate (1.77 g, 12.4 mmol) and  $(9\text{-BBN})_2$  (1.51 g, 6.18 mmol) in THF (12 mL) at room temperature for 4 h, was added. The resulting mixture was stirred at 80 °C for 12 h, and then filtered through a pad of Florisil. The filtrate was washed with water (30 mL), and the aqueous phase was extracted with ethyl acetate ( $3 \times 50$  mL). The combined organic phase was dried over anhydrous  $\text{Na}_2\text{SO}_4$  and concentrated in vacuo. The residue was chromatographed on silica-gel column with petroleum ether/ethyl acetate (1:1) to give the product (+)-18 (3.43 g, 85% yield) as a light yellow-green solid: mp 44–46 °C;  $R_f$  0.45 (petroleum ether/ethyl acetate = 2:3);  $[\alpha]_D^{25} +142.6$  ( $c$  1.0,  $\text{CHCl}_3$ ); IR (KBr):  $\nu_{\text{max}} = 3374, 2977, 2937, 2897, 1710, 1589, 1484, 1366, 1158, 1051, 992, 950, 733$   $\text{cm}^{-1}$ ;  $^1\text{H}$  NMR (400 MHz,  $\text{CDCl}_3$ )  $\delta$ : 6.58 (s, 1H), 6.54 (s, 1H), 5.88 (dd,  $J = 10.0, 2.0$  Hz, 1H), 5.56 (dd,  $J = 10.0, 2.0$  Hz, 1H), 4.55 (brs, 1H), 4.53–4.50 (m, 1H), 4.28–4.20 (m, 1H), 4.19–4.10 (m, 2H), 4.10–4.01 (m, 2H), 3.97–3.89 (m, 1H), 3.84 (s, 3H), 3.38–3.25 (m, 2H), 3.00 (d,  $J = 14.8$  Hz, 1H), 2.80 (d,  $J = 14.8$  Hz, 1H), 2.69 (t,  $J = 6.8$  Hz, 2H), 2.55 (d,  $J = 13.2$  Hz, 1H), 2.19 (ddd,  $J = 13.2, 5.2, 2.4$  Hz, 1H), 1.44 (s, 9H), 1.24 (t,  $J = 7.2$  Hz, 3H);  $^{13}\text{C}$  NMR (101 MHz,  $\text{CDCl}_3$ )  $\delta$ : 170.5, 155.9, 148.2, 140.4, 139.3, 129.8, 127.5, 125.1, 114.9, 110.7, 104.5, 79.2, 73.7, 65.7, 65.4, 60.6, 55.8, 41.9, 41.3, 36.0, 34.5, 31.0, 28.4, 14.2; HRMS ( $m/z$ ): calcd for  $\text{C}_{26}\text{H}_{35}\text{NNaO}_8$  [ $M + \text{Na}$ ] $^+$  512.2255, found 512.2258.

### Synthesis of compound (+)-19

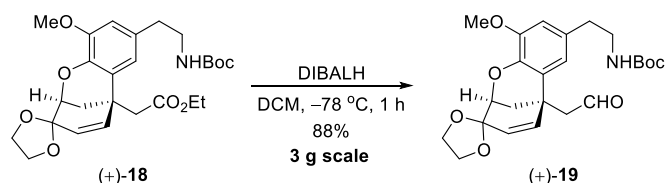

To a solution of compound (+)-18 (3.40 g, 6.94 mmol) in  $\text{CH}_2\text{Cl}_2$  (40 mL) at  $-78\text{ }^\circ\text{C}$  was added DIBALH (13.9 mL, 1.0 M in hexane, 13.9 mmol) dropwise. The resulting mixture was stirred at  $-78\text{ }^\circ\text{C}$  for 1 h and then quenched with saturated aqueous sodium-potassium tartrate solution (30 mL). The reaction mixture was extracted with  $\text{CH}_2\text{Cl}_2$  ( $3 \times 30$  mL), dried over anhydrous  $\text{Na}_2\text{SO}_4$  and concentrated in vacuo. The residue was chromatographed on silica-gel column with petroleum ether/ethyl acetate (1:1) to give the product (+)-19 (2.72 g, 88% yield) as a white solid: mp 75–77 °C;  $R_f$  0.34 (petroleum ether/ethyl acetate = 2:3);  $[\alpha]_D^{25} +155.7$  ( $c$  1.0,  $\text{CHCl}_3$ ); IR (KBr):  $\nu_{\text{max}} = 3599, 3354, 2966, 2932, 2897, 1708, 1589, 1516, 1483, 1366, 1273, 1166, 1144, 950, 844, 733$   $\text{cm}^{-1}$ ;  $^1\text{H}$  NMR (400 MHz,  $\text{CDCl}_3$ )  $\delta$ : 9.82 (s, 1H), 6.61 (s, 1H), 6.50 (s, 1H), 5.90 (dd,  $J = 10.0, 1.6$  Hz, 1H), 5.62 (dd,  $J = 10.0, 1.6$  Hz, 1H), 4.59–4.48 (m, 2H), 4.31–4.23 (m, 1H), 4.14–4.03 (m, 2H), 3.97–3.91 (m, 1H), 3.85 (s, 3H), 3.33–3.25 (m, 2H), 2.97–2.91 (m, 2H), 2.70 (t,  $J = 6.8$  Hz, 2H), 2.47 (d,  $J = 13.2$  Hz, 1H), 2.18 (ddd,  $J = 13.2, 4.8, 2.0$  Hz, 1H), 1.44 (s, 9H);  $^{13}\text{C}$  NMR (101 MHz,  $\text{CDCl}_3$ )  $\delta$ : 200.6, 155.9, 148.5, 140.4, 138.7, 130.3, 126.8, 126.0, 115.0, 110.9, 104.3, 79.3, 73.5, 65.8, 65.4, 55.9, 49.3, 41.9, 36.0,

33.9, 31.5, 28.4; HRMS ( $m/z$ ): calcd for  $C_{24}H_{31}NNaO_7$  ( $[M + Na]^+$ ) 468.1993, found 468.1998.

### Synthesis of compound (+)-20

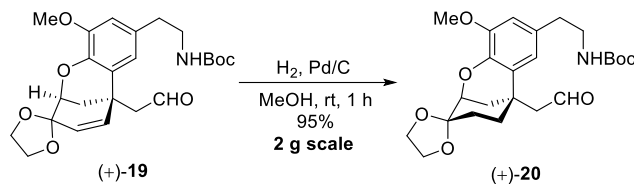

The mixture of compound (+)-**19** (2.67 g, 6.00 mmol) and 10% Pd/C (0.27 g) in MeOH (30 mL) was charged with  $H_2$  balloon, and the mixture was stirred at room temperature for 1 h. The mixture was then filtered through a pad of Florisil and concentrated in vacuo. The residue was chromatographed on silica-gel column with petroleum ether/ethyl acetate (1:1) to give the product (+)-**20** (2.57 g, 95% yield) as a white solid: mp 123–125 °C;  $R_f$  0.55 (petroleum ether/ethyl acetate, 1:2);  $[\alpha]_D^{25} +25.2$  ( $c$  1.0,  $CHCl_3$ ); IR (KBr):  $\nu_{max} = 3727, 3703, 3626, 3602, 3369, 2934, 2890, 1714, 1588, 1517, 1482, 1365, 1272, 1220, 1169, 1146, 1110, 1037, 733\text{ cm}^{-1}$ ;  $^1H$  NMR (400 MHz,  $CDCl_3$ )  $\delta$ : 9.66 (t,  $J = 2.8$  Hz, 1H), 6.61 (s, 1H), 6.55 (s, 1H), 4.64 (brs, 1H), 4.33 (t,  $J = 2.8$  Hz, 1H), 4.09–3.99 (m, 3H), 3.95–3.90 (m, 1H), 3.86 (s, 3H), 3.39–3.21 (m, 2H), 3.02 (dd,  $J = 16.0, 2.0$  Hz, 1H), 2.75–2.66 (m, 2H), 2.60 (dd,  $J = 16.0, 2.4$  Hz, 1H), 2.16–2.13 (m, 2H), 1.95–1.85 (m, 1H), 1.66–1.61 (m, 1H), 1.61–1.53 (m, 2H), 1.44 (s, 9H);  $^{13}C$  NMR (101 MHz,  $CDCl_3$ )  $\delta$ : 201.5, 155.9, 148.1, 141.9, 130.5, 126.2, 116.6, 110.5, 107.8, 79.2, 73.3, 65.0 (2), 55.8, 51.4, 41.9, 38.2, 36.0, 33.1, 31.7, 28.6, 28.4; HRMS ( $m/z$ ): calcd for  $C_{24}H_{34}NO_7^+$  ( $[M + H]^+$ ) 448.2330, found 448.2327.

### Synthesis of compound (+)-21

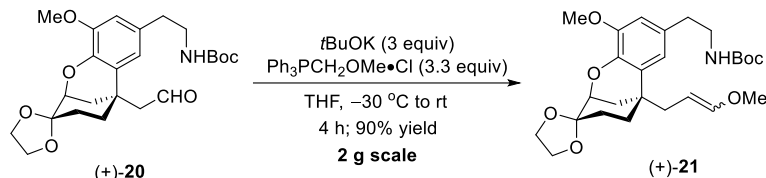

To a solution of (methoxymethyl)triphenylphosphonium chloride (6.86 g, 20.0 mmol) in THF (20 mL) was added  $tBuOK$  (2.08 g, 18.0 mmol) in portions at  $-30\text{ }^\circ\text{C}$ , and the resulting suspension solution was stirred at the same temperature for 0.5 h. The solution of compound (+)-**20** (2.69 g, 6.00 mmol) in 15 mL THF was then added, and the resulting mixture was stirred at room temperature for another 4 h. The reaction mixture was quenched with  $H_2O$  (30 mL) and extracted with ethyl acetate ( $4 \times 30\text{ mL}$ ). The combined organic phase was washed with brine, dried over anhydrous  $Na_2SO_4$ , and concentrated in vacuo. The residue was chromatographed on silica-gel column with petroleum ether/ethyl acetate (2:1 to 1:1) to give the product (+)-**21** as a mixture of *Z* and *E* isomers (44:56, 2.57 g, 90% yield): mp 46–51 °C;  $R_f$  0.53 (petroleum ether/ethyl acetate = 1:1);  $[\alpha]_D^{25} +33.8$  ( $c$  1.0,  $CHCl_3$ ); IR (KBr):  $\nu_{max} = 3632, 3359, 2932, 1708, 1587, 1516, 1480, 1365, 1250, 1145, 1022, 949, 733\text{ cm}^{-1}$ ;  $^1H$  NMR (400 MHz,  $CDCl_3$ )  $\delta$ : 6.62 (s, 0.44H), 6.60 (s, 0.56H), 6.56 (s, 1H), 6.30 (d,  $J = 12.8$  Hz, 0.56H), 5.93 (d,  $J = 6.4$  Hz, 0.44H), 4.65–4.54 (m, 1.56H), 4.30 (m, 1.2H), 4.24 (q,  $J = 7.2$  Hz, 0.56H), 4.09–3.95 (m, 3.7H), 3.95–3.86 (m, 1.0H), 3.85 (s, 1.68H), 3.84 (s, 1.32H), 3.59 (s, 1.32H), 3.45 (s, 1.56H), 3.37–3.25 (m, 2.0H), 2.75–2.66 (m, 2.0H), 2.60–2.43 (m, 1.44H), 2.22 (dd,  $J = 14.0, 8.8$  Hz, 0.56H), 1.96–1.75 (m, 4H), 1.57–1.50 (m, 2H), 1.44 (s, 9H);  $^{13}C$  NMR (101 MHz,  $CDCl_3$ )  $\delta$ : 155.9, 149.0, 147.8, 147.7, 142.1, 129.8, 129.6, 128.1 (2), 117.2, 116.8, 109.8 (2), 108.4 (2), 101.7, 97.8, 79.1, 73.7

(2), 65.0, 64.9, 59.4 (2), 56.0, 55.8, 42.1, 42.0, 37.9, 37.7, 36.9, 36.0, 35.9, 34.3, 34.1, 32.7, 30.8, 29.0, 28.4; HRMS ( $m/z$ ): calcd for  $C_{26}H_{41}N_2O_7$  ( $[M + NH_4]^+$ ) 493.2908, found 493.2905.

### Synthesis of compound (+)-10

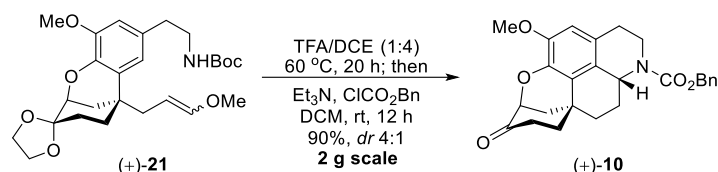

To a solution of (+)-**21** (2.80 g, 5.89 mmol) in DCE (55 mL) was added 14 mL TFA dropwise. The resulting reaction mixture was stirred at 60 °C for 20 h and then concentrated in vacuo. The residue was re-dissolved with  $CH_2Cl_2$  (40 mL), and  $Et_3N$  (6.09 mL, 44.0 mmol) and  $ClCO_2Bn$  (3.43 mL, 23.6 mmol) were added dropwise successively at room temperature. The reaction mixture was stirred for 12 h, quenched with  $H_2O$  (40 mL), and extracted with  $CH_2Cl_2$  ( $3 \times 30$  mL). The combined organic phase was dried over anhydrous  $Na_2SO_4$  and concentrated in vacuo. The residue was chromatographed on silica-gel column with petroleum ether/ethyl acetate (1:1) to give the product (+)-**10** as a mixture of two diastereoisomers ( $dr = 4:1$ , 2.30 g, 90% yield): white solid, mp 62–67 °C;  $R_f$  0.46 (petroleum ether/ethyl acetate = 1:1);  $[\alpha]_D^{25} +149.0$  ( $c$  1.0,  $CHCl_3$ ); IR (KBr):  $\nu_{max} = 2938, 2866, 1725, 1695, 1600, 1486, 1423, 1280, 1195, 1101, 990, 735, 700$   $cm^{-1}$ ;  $^1H$  NMR (400 MHz,  $CDCl_3$ )  $\delta$ : 7.53–7.28 (m, 5H), 6.61 (s, 1H), 5.27–5.18 (m, 2H), 4.94–4.82 (m, 0.85H), 4.75 (d,  $J = 4.8$  Hz, 0.15 H), 4.71–4.69 (m, 0.85H), 4.58–4.56 (m, 1.5H), 4.48–4.39 (m, 1H), 3.87 (s, 3H), 2.99–2.76 (m, 2H), 2.65–2.56 (m, 1H), 2.47–2.18 (m, 4H), 2.15–2.03 (m, 2H), 1.97–1.83 (m, 2H), 1.73 (m, 1H), 1.64–1.49 (m, 1H);  $^{13}C$  NMR (101 MHz,  $CDCl_3$ )  $\delta$ : 206.0, 155.2, 146.4, 140.2, 136.8, 128.5, 128.0, 127.8, 127.8, 125.9, 123.7, 110.2, 78.5, 67.1, 56.0, 49.4, 40.2, 39.2, 39.1, 36.6, 32.2, 31.2, 30.7, 29.9; HRMS ( $m/z$ ): calcd for  $C_{26}H_{28}NO_5$  ( $[M + H]^+$ ) 434.1962, found 434.1957.



## D) Enantioselective Synthesis of Pentacyclic Homoproaporphine Alkaloids

The advanced chiral intermediate (-)-**9** and the members of pentacyclic homoproaphine alkaloid family were synthesized by the following procedure.

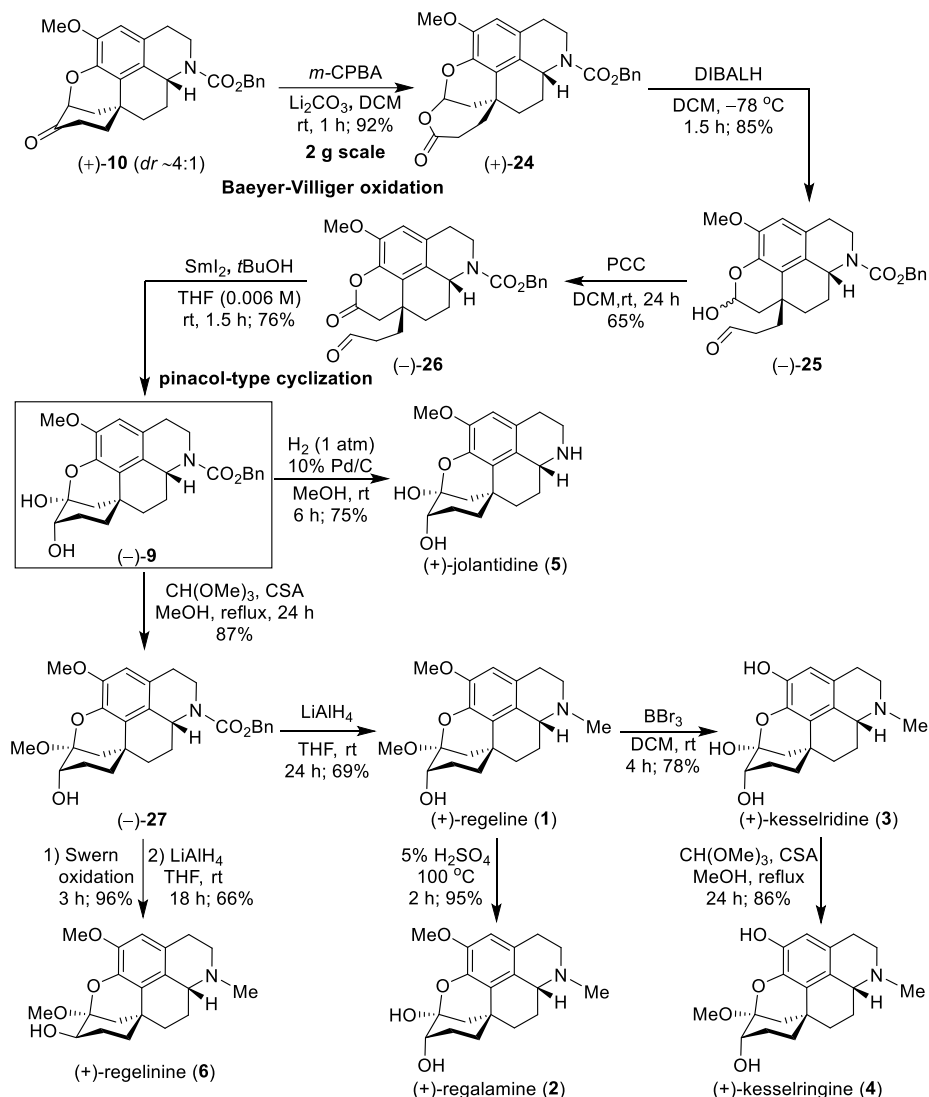

### Synthesis of compound (+)-24

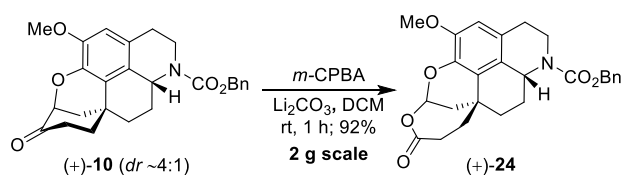

To a solution of compound (+)-**10** (2.30 g, 5.31 mmol) in CH<sub>2</sub>Cl<sub>2</sub> (35 mL) was added Li<sub>2</sub>CO<sub>3</sub> (0.12 g, 1.60 mmol) and *m*-CPBA (1.47 g, 6.80 mmol). The resulting mixture was stirred at room temperature for 1 h, and quenched with saturated Na<sub>2</sub>CO<sub>3</sub> solution (30 mL), and extracted with CH<sub>2</sub>Cl<sub>2</sub> (3 × 40 mL). The combined organic phase was dried over anhydrous Na<sub>2</sub>SO<sub>4</sub> and concentrated in vacuo. The residue was chromatographed on silica-gel column with petroleum ether/ethyl acetate (2:1) to give the product (+)-**24** (2.20 g, 92% yield) as a white solid, mp 83–85 °C; *R*<sub>f</sub> 0.47 (petroleum ether/ethyl acetate = 1:1); [α]<sub>D</sub><sup>25</sup> +55.8 (*c* 1.0, CHCl<sub>3</sub>); IR (KBr): ν<sub>max</sub> = 2930, 2871, 1740, 1695, 1423, 1266, 1099, 1036, 737, 701 cm<sup>-1</sup>; <sup>1</sup>H NMR (400 MHz, CDCl<sub>3</sub>) δ: 7.45–7.29 (m, 5H), 6.64 (s, 1H), 5.97 (dd, *J* = 5.2,

0.8 Hz, 1H), 5.30–5.14 (m, 2H), 4.76 (dd,  $J = 12.0, 4.4$  Hz, 1H), 4.47–4.37 (m, 1H), 3.88 (s, 3H), 2.93–2.80 (m, 2H), 2.66–2.58 (m, 1H), 2.57–2.49 (m, 1H), 2.48–2.37 (m, 1H), 2.34–2.20 (m, 2H), 2.16–2.08 (m, 1H), 2.03–1.95 (m, 1H), 1.93–1.83 (m, 1H), 1.79–1.70 (m, 1H), 1.61–1.48 (m, 1H);  $^{13}\text{C}$  NMR (101 MHz,  $\text{CDCl}_3$ )  $\delta$ : 172.8, 155.1, 145.9, 140.3, 136.8, 128.6, 128.1, 127.8, 127.4, 125.1, 123.3, 110.6, 94.7, 67.2, 56.1(2), 49.8, 40.9, 39.1, 36.1, 35.5, 33.2, 32.4, 31.9, 30.1; HRMS ( $m/z$ ): calcd for  $\text{C}_{26}\text{H}_{28}\text{NO}_6$  ( $[\text{M} + \text{H}]^+$ ) 450.1911, found 450.1904.

#### Synthesis of compound (–)-25

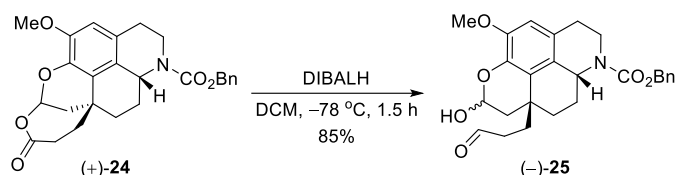

To a solution of compound (+)-**24** (0.66 g, 1.47 mmol) in  $\text{CH}_2\text{Cl}_2$  (15 mL) at  $-78^\circ\text{C}$  was added DIBALH (2.20 mL, 1.0 M in hexane, 2.20 mmol) dropwise. The mixture was stirred at  $-78^\circ\text{C}$  for 1.5 h, quenched with saturated aqueous solution of sodium-potassium tartrate (20 mL), and extracted with  $\text{CH}_2\text{Cl}_2$  ( $3 \times 20$  mL). The combined organic phase was dried over anhydrous  $\text{Na}_2\text{SO}_4$  and concentrated in vacuo. The residue was chromatographed on silica-gel column with petroleum ether/ethyl acetate (1:1 to 100% ethyl acetate) to give the product (–)-**25** (0.56 g, 85% yield) as a mixture of diastereoisomers (not stable).  $R_f$  0.58 (100% ethyl acetate);  $[\alpha]_D^{25} -123.0$  ( $c$  1.0,  $\text{CHCl}_3$ ); IR (KBr):  $\nu_{\text{max}} = 3744, 3479, 2930, 1695, 1424, 1358, 1269, 1195, 1101, 735, 699$   $\text{cm}^{-1}$ ;  $^1\text{H}$  NMR (400 MHz,  $\text{CDCl}_3$ )  $\delta$ : 9.71 (s, 1H), 7.49–7.32 (m, 5H), 6.59 (s, 1H), 5.87–5.69 (m, 1H), 5.26–5.18 (m, 2H), 4.84 (dd,  $J = 10.4, 5.6$  Hz, 1H), 4.46–4.35 (m, 1H), 3.86 (s, 3H), 2.90–2.83 (m, 2H), 2.64–2.56 (m, 1H), 2.53–2.45 (m, 1H), 2.44–2.26 (m, 2H), 2.22 (dd,  $J = 13.9, 4.0$  Hz, 1H), 2.16–2.05 (m, 1H), 1.97–1.84 (m, 2H), 1.68 (dd,  $J = 13.9, 8.8$  Hz, 2H), 1.55–1.48 (m, 1H);  $^{13}\text{C}$  NMR (101 MHz,  $\text{CDCl}_3$ )  $\delta$ : 201.2, 155.3, 147.1, 139.9, 136.8, 128.6, 128.5, 128.1, 128.0, 127.8, 126.8, 110.3, 92.7, 67.2, 55.9, 42.1, 39.8, 39.5, 39.2, 34.6, 33.0, 32.4, 30.4, 29.3; HRMS ( $m/z$ ): calcd for  $\text{C}_{26}\text{H}_{30}\text{NO}_6$  ( $[\text{M} + \text{H}]^+$ ) 452.2068, found 452.2074.

#### Synthesis of compound (–)-26

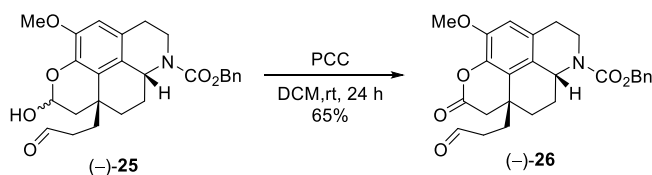

To a solution of compound (–)-**25** (0.35 g, 0.77 mmol) in  $\text{CH}_2\text{Cl}_2$  (15 mL) was added pyridinium chlorochromate (PCC, 0.26 g, 1.20 mmol), and the mixture was stirred at room temperature for 1.5 h. The reaction mixture was filtrated through a short plug of silica gel and concentrated in vacuo. The residue was chromatographed on silica-gel column with petroleum ether/ethyl acetate (1:1) to give the product (–)-**26** (0.23 g, 65% yield) as a white solid (with a minor diastereoisomer): mp  $59\text{--}62^\circ\text{C}$ ;  $R_f$  0.4 (petroleum ether/ethyl acetate = 1:1);  $[\alpha]_D^{25} -36.6$  ( $c$  1.0,  $\text{CHCl}_3$ ); IR (KBr):  $\nu_{\text{max}} = 3733, 3625, 2939, 1769, 1696, 1488, 1447, 1268, 1229, 1195, 1126, 1100, 904, 737, 700$   $\text{cm}^{-1}$ ;  $^1\text{H}$  NMR (400 MHz,  $\text{CDCl}_3$ )  $\delta$ : 9.68 (s, 1H), 7.52–7.33 (m, 5H), 6.69 (s, 1H), 5.28–5.21 (m, 2H), 4.75 (dd,  $J = 11.2, 4.4$  Hz, 1H), 4.47–4.45 (m, 1H), 3.90 (s, 3H), 2.94–2.82 (m, 2H), 2.77 (d,  $J = 16.0$  Hz, 1H), 2.71–2.59 (m, 2H), 2.55–2.46 (m, 1H), 2.45–2.28 (m, 2H), 2.05–1.99 (m, 1H), 1.99–1.89 (m, 2H), 1.75–1.68 (m, 1H),

1.57–1.48 (m, 1H);  $^{13}\text{C}$  NMR (101 MHz,  $\text{CDCl}_3$ )  $\delta$ : 200.1, 167.0, 155.2, 146.3, 138.8, 136.6, 130.8, 128.6, 128.1, 127.9, 125.7, 125.1, 111.4, 67.3, 56.1, 50.5, 42.3, 39.2, 38.9, 35.1, 32.5, 31.7, 30.6; HRMS ( $m/z$ ): calcd for  $\text{C}_{26}\text{H}_{28}\text{NO}_6$  ( $[\text{M} + \text{H}]^+$ ) 450.1911, found 450.1916.

#### Synthesis of compound (–)-9

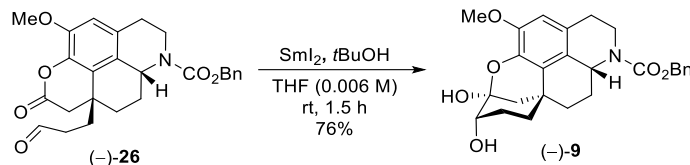

To a solution of compound (–)-**26** (0.23 g, 0.50 mmol) in THF (83 mL) were added *t*BuOH (0.23 mL, 2.50 mmol) and  $\text{SmI}_2$  (25.0 mL, 2.50 mmol, 0.1 M in THF) at room temperature. The mixture was stirred at room temperature for 1.5 h, quenched with saturated aqueous  $\text{NH}_4\text{Cl}$  solution (50 mL), and extracted with  $\text{Et}_2\text{O}$  ( $3 \times 50$  mL). The combined organic phase was dried over anhydrous  $\text{Na}_2\text{SO}_4$  and concentrated in vacuo. The residue was chromatographed on silica-gel column with petroleum ether/ethyl acetate (1:1 to 100% ethyl acetate) to give the product (–)-**9** (0.17 g, 76% yield) as a white solid: mp 98–100 °C;  $R_f$  0.41 (100% ethyl acetate);  $[\alpha]_D^{25}$  –86.4 ( $c$  1.0,  $\text{CHCl}_3$ ); IR (KBr):  $\nu_{\text{max}}$  = 3463, 2930, 2866, 1695, 1601, 1427, 1358, 1267, 1173, 1095, 1053, 736, 700  $\text{cm}^{-1}$ ;  $^1\text{H}$  NMR (400 MHz,  $\text{CD}_3\text{OD}$ )  $\delta$ : 7.48–7.21 (m, 5H), 6.60 (s, 1H), 5.22–5.12 (m, 2H), 4.71 (dd,  $J$  = 11.6, 4.8 Hz, 1H), 4.37–4.23 (m, 1H), 3.76 (s, 3H), 3.73–3.67 (m, 1H), 2.84 (t,  $J$  = 12.0 Hz, 1H), 2.70 (td,  $J$  = 12.0, 4.0 Hz, 1H), 2.55 (d,  $J$  = 15.2 Hz, 1H), 2.21–2.14 (m, 2H), 1.90–1.82 (m, 1H), 1.72 (td,  $J$  = 13.2, 3.6 Hz, 1H), 1.66–1.58 (m, 2H), 1.57–1.43 (m, 3H), 1.35 (tt,  $J$  = 14.4, 4.0 Hz, 1H);  $^{13}\text{C}$  NMR (101 MHz,  $\text{CD}_3\text{OD}$ )  $\delta$ : 155.5, 145.7, 142.5, 136.8, 127.8, 127.5, 127.5, 124.8, 124.5, 123.9, 110.3, 99.3, 70.6, 66.9, 55.1, 49.7, 38.9, 38.7, 34.6, 33.4, 32.9, 29.2, 27.1; HRMS ( $m/z$ ): calcd for  $\text{C}_{26}\text{H}_{30}\text{NO}_6$  ( $[\text{M} + \text{H}]^+$ ) 452.2068, found 452.2065.

#### Synthesis of compound (–)-27

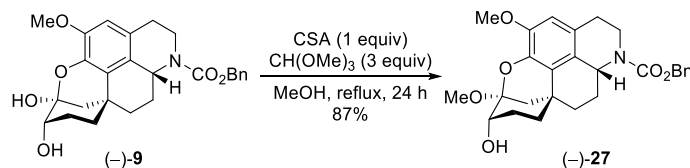

To a solution of compound (–)-**9** (0.19 g, 0.42 mmol) in MeOH (10 mL) were added  $\text{CH}(\text{OMe})_3$  (0.14 mL, 1.25 mmol) and (+)-10-camphorsulfonic acid (CSA, 0.10 g, 0.42 mmol). The reaction mixture was heated to reflux for 24 h, diluted with saturated aqueous solution of  $\text{NaHCO}_3$  (10 mL), and extracted with EtOAc ( $3 \times 10$  mL). The combined organic phase was dried over anhydrous  $\text{Na}_2\text{SO}_4$  and concentrated in vacuo. The residue was chromatographed on silica-gel column with petroleum ether/ethyl acetate (1:1) to give the product (–)-**27** (0.17 g, 87% yield) as a white solid (with a minor diastereoisomer), mp 75–77 °C;  $R_f$  0.36 (petroleum ether/ethyl acetate = 1:1);  $[\alpha]_D^{25}$  –35.5 ( $c$  1.0,  $\text{CHCl}_3$ ); IR (KBr):  $\nu_{\text{max}}$  = 3483, 2938, 2838, 1695, 1425, 1267, 1198, 1097, 1061, 736  $\text{cm}^{-1}$ ;  $^1\text{H}$  NMR (400 MHz,  $\text{CDCl}_3$ )  $\delta$ : 7.41–7.29 (m, 5H), 6.56 (s, 1H), 5.23–5.18 (m, 2H), 4.81 (dd,  $J$  = 11.2, 5.2 Hz, 0.8H), 4.53 (dd,  $J$  = 10.4, 5.6 Hz, 0.2H), 4.48–4.32 (m, 1H), 3.80–3.88 (m, 4H), 3.43 (s, 3H), 2.97–2.77 (m, 2H), 2.57 (d,  $J$  = 14.0 Hz, 1H), 2.43 (s, 1H), 2.34–2.28 (m, 1H), 2.07–2.01 (m, 1H), 1.99–1.82 (m, 2H), 1.78–1.63 (m, 4H), 1.44–1.38 (m, 1H);  $^{13}\text{C}$  NMR (101 MHz,  $\text{CDCl}_3$ , rotamer mixture)  $\delta$ :

156.4, 146.0, 142.5, 136.9, 128.5, 128.0, 127.8, 124.3, 124.3, 122.4, 110.2, 102.2, 71.3, 70.6, 67.0, 56.0, 49.2, 39.1, 35.4, 34.9, 34.6, 33.7, 33.0, 29.9, 26.6; HRMS ( $m/z$ ): calcd for  $C_{27}H_{32}NO_6$  ( $[M + H]^+$ ) 466.2224, found 466.2222.

### Synthesis of (+)-regeline (**1**)

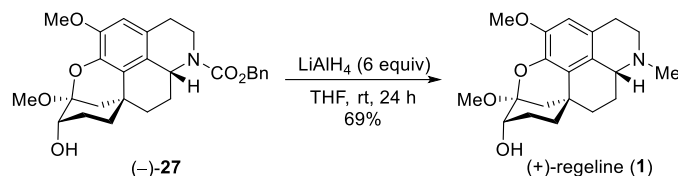

To a solution of (–)-**27** (87.0 mg, 0.19 mmol) in THF (6 mL) was added  $\text{LiAlH}_4$  (43.0 mg, 1.12 mmol), and the resulting mixture was stirred at room temperature for 24 h. The reaction was then quenched by slow addition of  $\text{H}_2\text{O}$  (8 mL), and the mixture was extracted with EtOAc ( $3 \times 6$  mL). The combined organic phase was dried over anhydrous  $\text{Na}_2\text{SO}_4$  and concentrated in vacuo. The residue was chromatographed on silica-gel column with ethyl acetate/triethylamine (30:1) to give the product (+)-regeline (**1**) (45.0 mg, 69% yield) as a white solid: mp 201–203 °C (lit.<sup>2</sup> 198–200 °C);  $R_f$  0.26 (ethyl acetate/triethylamine = 30:1);  $[\alpha]_D^{25} +92.0$  ( $c$  1.5, MeOH) (lit.<sup>2</sup> +93 ( $c$  1.5, MeOH)); IR (KBr):  $\nu_{\text{max}} = 3175, 2945, 2877, 2833, 1598, 1485, 1463, 1374, 1259, 1225, 1159, 1061, 1004, 872, 700 \text{ cm}^{-1}$ ;  $^1\text{H}$  NMR (400 MHz,  $\text{CDCl}_3$ )  $\delta$ : 6.52 (s, 1H), 3.84–3.83 (m, 1H), 3.83 (s, 3H), 3.43 (s, 3H), 3.12–3.03 (m, 1H), 3.03–2.98 (m, 1H), 2.94 (dd,  $J = 9.7, 5.5$  Hz, 1H), 2.62 (dd,  $J = 15.6, 3.8$  Hz, 1H), 2.53–2.47 (m, 1H), 2.45 (s, 3H), 2.31–2.25 (m, 1H), 2.01 (d,  $J = 12.3$  Hz, 1H), 1.86–1.78 (m, 2H), 1.77–1.69 (m, 1H), 1.73–1.66 (m, 2H), 1.59–1.53 (m, 1H), 1.48–1.33 (m, 2H);  $^{13}\text{C}$  NMR (101 MHz,  $\text{CDCl}_3$ )  $\delta$ : 146.0, 142.1, 126.2, 124.6, 123.9, 109.8, 102.0, 70.8, 60.0, 55.9, 537, 49.2, 43.7, 34.7, 34.3, 34.2, 33.1, 28.9, 27.1, 26.4; HRMS ( $m/z$ ): calcd for  $C_{20}H_{28}NO_4$  ( $[M + H]^+$ ) 346.2013, found 346.2011.

The product (+)-**1** (20.0 mg) was re-dissolved in a mixed solvent of ethyl acetate (1 mL) and *n*-hexane (1 mL). After slowly evaporating the solvents at ambient temperature, the fine crystals were obtained and their structure was analyzed by X-ray diffraction.

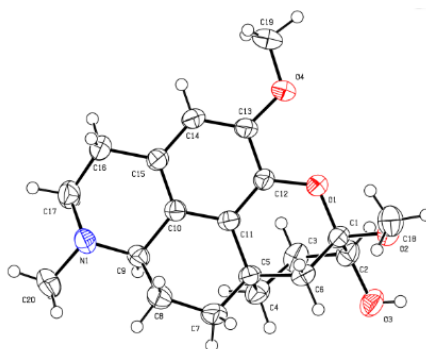

**Table S2.** Crystal data and structure refinement for (+)-regeline (**1**) (CCDC 2003662)

|                                             |                                                               |
|---------------------------------------------|---------------------------------------------------------------|
| Empirical formula                           | C <sub>20</sub> H <sub>27</sub> NO <sub>4</sub>               |
| Formula weight                              | 345.42                                                        |
| Temperature/K                               | 294.15                                                        |
| Crystal system                              | trigonal                                                      |
| Space group                                 | P3 <sub>2</sub>                                               |
| a/Å                                         | 11.34890(10)                                                  |
| b/Å                                         | 11.34890(10)                                                  |
| c/Å                                         | 12.20100(10)                                                  |
| $\alpha$ /°                                 | 90                                                            |
| $\beta$ /°                                  | 90                                                            |
| $\gamma$ /°                                 | 120                                                           |
| Volume/Å <sup>3</sup>                       | 1360.92(3)                                                    |
| Z                                           | 3                                                             |
| $\rho_{\text{calc}}$ /cm <sup>3</sup>       | 1.264                                                         |
| $\mu$ /mm <sup>-1</sup>                     | 0.706                                                         |
| F(000)                                      | 558.0                                                         |
| Crystal size/mm <sup>3</sup>                | 0.34 × 0.26 × 0.24                                            |
| Radiation                                   | CuK $\alpha$ ( $\lambda$ = 1.54184)                           |
| 2 $\theta$ range for data collection/°      | 8.998 to 158.73                                               |
| Index ranges                                | -14 ≤ h ≤ 14, -13 ≤ k ≤ 13, -15 ≤ l ≤ 15                      |
| Reflections collected                       | 11417                                                         |
| Independent reflections                     | 3640 [R <sub>int</sub> = 0.0195, R <sub>sigma</sub> = 0.0157] |
| Data/restraints/parameters                  | 3640/1/234                                                    |
| Goodness-of-fit on F <sup>2</sup>           | 1.044                                                         |
| Final R indexes [I ≥ 2 $\sigma$ (I)]        | R <sub>1</sub> = 0.0302, wR <sub>2</sub> = 0.0869             |
| Final R indexes [all data]                  | R <sub>1</sub> = 0.0304, wR <sub>2</sub> = 0.0871             |
| Largest diff. peak/hole / e Å <sup>-3</sup> | 0.24/-0.15                                                    |
| Flack parameter                             | 0.04(6)                                                       |

**Table S3.** Comparison of NMR data of natural and synthetic (+)-regeline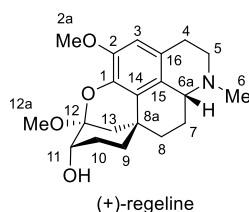

| No.                                         | <sup>1</sup> H NMR (CDCl <sub>3</sub> ) δ: |                                    |
|---------------------------------------------|--------------------------------------------|------------------------------------|
|                                             | Natural <sup>[2]</sup>                     | Synthetic (400 MHz)                |
| 3                                           | 6.42 (s)                                   | 6.52 (s)                           |
| 6a                                          | —                                          | 2.94 (dd, <i>J</i> = 9.7, 5.5 Hz)  |
| 11                                          | —                                          | 3.84–3.83 (m)                      |
| O-Me                                        | 3.74 (s)                                   | 3.83 (s)                           |
| O-Me                                        | 3.34 (s)                                   | 3.43 (s)                           |
| N-Me                                        | 2.36 (s)                                   | 2.45 (s)                           |
| <sup>13</sup> C NMR (CDCl <sub>3</sub> ) δ: |                                            |                                    |
|                                             | Natural <sup>[2]</sup>                     | Synthetic (101 MHz)                |
| 1                                           | 145.0                                      | 146.0                              |
| 2                                           | 142.1                                      | 142.1                              |
| 14                                          | 126.4                                      | 126.2                              |
| 15                                          | 124.6                                      | 124.6                              |
| 16                                          | 123.8                                      | 123.9                              |
| 3                                           | 110.2                                      | 109.8                              |
| 12                                          | 101.9                                      | 102.0                              |
| 11                                          | 70.5                                       | 70.8                               |
| 6a                                          | 60.0                                       | 60.0                               |
| 2a                                          | 56.0                                       | 55.9                               |
| 5                                           | 53.6                                       | 53.7                               |
| 12a                                         | 48.9                                       | 49.2                               |
| 6                                           | 43.6                                       | 43.7                               |
| 8a                                          | 34.6                                       | 34.7                               |
| 4, 13, 10, 9, 8, 7                          | 34.2, 34.2, 33.0, 28.8, 27.0, 26.4         | 34.3, 34.2, 33.1, 28.9, 27.1, 26.4 |

**Synthesis of (+)-regalamine (2)**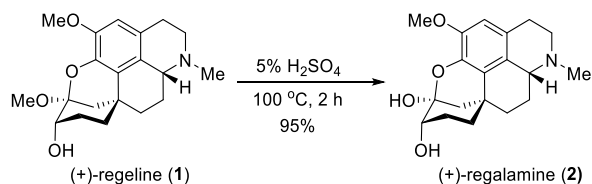

The mixture of (+)-**1** (44.0 mg, 0.13 mmol) and 2 mL of 5% H<sub>2</sub>SO<sub>4</sub> was heated to 100 °C and stirred at the same temperature for 2 h. The reaction mixture was then cooled to room temperature, and a saturated aqueous solution of Na<sub>2</sub>CO<sub>3</sub> (4 mL) was added to quench the reaction. The mixture was extracted with CH<sub>2</sub>Cl<sub>2</sub> (3 × 5 mL). The combined organic phase was dried over anhydrous Na<sub>2</sub>SO<sub>4</sub> and concentrated in vacuo. The residue was chromatographed on silica-gel column with ethyl acetate/

triethylamine (20:1) to give the product (+)-regalamine (**2**) (41.0 mg, 95% yield) as a white solid: mp 220–222 °C (lit.<sup>3</sup> 225–226 °C);  $R_f$  0.15 (ethyl acetate/triethylamine = 30:1);  $[\alpha]_D^{25} +43.8$  ( $c$  1.92, MeOH) (lit.<sup>3</sup> +33 ( $c$  1.93, MeOH)); IR (KBr):  $\nu_{\max} = 3464, 3370, 2938, 2858, 2794, 1599, 1485, 1446, 1373, 1265, 1224, 1174, 1138, 1055, 1013, 875, 734, 701\text{ cm}^{-1}$ ;  $^1\text{H}$  NMR (400 MHz,  $\text{CDCl}_3$ )  $\delta$ : 6.45 (s, 1H), 3.83–3.82 (m, 1H), 3.81 (s, 3H), 3.13–3.09 (m, 1H), 3.00–2.98 (m, 1H), 2.94 (dd,  $J = 10.0, 5.6\text{ Hz}$ , 1 H), 2.59 (dd,  $J = 16.4, 3.2\text{ Hz}$ , 1 H), 2.49 (td,  $J = 11.6, 3.6\text{ Hz}$ , 1 H), 2.44 (s, 3 H), 2.29–2.26 (m, 1 H), 2.20 (d,  $J = 12.4\text{ Hz}$ , 1 H), 1.72–1.69 (m, 4 H), 1.52–1.48 (m, 1 H), 1.48–1.45 (m, 1 H), 1.38–1.35 (m, 1 H);  $^{13}\text{C}$  NMR (101 MHz,  $\text{CDCl}_3$ )  $\delta$ : 145.6, 141.4, 126.2, 124.7, 123.6, 109.5, 99.4, 71.4, 60.1, 55.8, 53.6, 43.6, 39.0, 34.9, 33.9, 32.8, 28.7, 26.9, 26.5; HRMS ( $m/z$ ): calcd for  $\text{C}_{19}\text{H}_{26}\text{NO}_4$  ( $[\text{M} + \text{H}]^+$ ) 332.1856, found 332.1863.

### Synthesis of (+)-kesselridine (**3**)

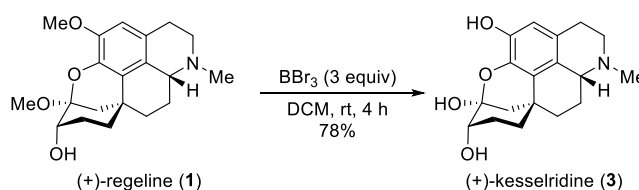

To a solution of (+)-regeline (20.0 mg, 57.9  $\mu\text{mol}$ ) in  $\text{CH}_2\text{Cl}_2$  (3 mL) was added  $\text{BBr}_3$  (0.17 mL, 1.0 M, 0.17 mmol) in  $\text{CH}_2\text{Cl}_2$ , and the resulting mixture was stirred at room temperature for 4 h. The reaction mixture was diluted with saturated aqueous solution of  $\text{NaHCO}_3$  (5 mL) and extracted with  $\text{CH}_2\text{Cl}_2$  ( $3 \times 8\text{ mL}$ ). The combined organic phase was dried over anhydrous  $\text{Na}_2\text{SO}_4$  and concentrated in vacuo. The residue was chromatographed on silica-gel column with ethyl acetate/triethylamine (20:1) to give the product (+)-kesselridine (**3**) (14.0 mg, 78% yield) as a white solid: mp 205–206 °C (lit.<sup>4</sup> 232–234 °C);  $R_f$  0.22 (ethyl acetate/triethylamine = 30:1);  $[\alpha]_D^{25} +200.0$  ( $c$  0.1, pyridine) (lit.<sup>4</sup> –50 (pyridine)); IR (KBr):  $\nu_{\max} = 3737, 3651, 3626, 2955, 2918, 2850, 1461, 1377, 1237, 1131, 992, 966, 895, 853\text{ cm}^{-1}$ ;  $^1\text{H}$  NMR (400 MHz,  $\text{CD}_3\text{OD}$ )  $\delta$ : 6.45 (s, 1H), 3.71–3.70 (m, 1H), 3.07–3.01 (m, 2H), 3.01–2.92 (m, 1H), 2.63–2.54 (m, 2H), 2.46 (s, 3H), 2.34–2.26 (m, 1H), 2.16 (d,  $J = 12.8\text{ Hz}$ , 1H), 1.80–1.68 (m, 3H), 1.65–1.58 (m, 1H), 1.56 (d,  $J = 12.4\text{ Hz}$ , 1H), 1.46–1.42 (m, 1H), 1.40–1.33 (m, 1H), 1.32–1.27 (m, 1H);  $^{13}\text{C}$  NMR (101 MHz,  $\text{CD}_3\text{OD}$ )  $\delta$ : 144.5, 142.4, 125.0, 124.8, 123.9, 114.2, 100.8, 72.1, 61.7, 54.5, 42.6, 39.6, 35.8, 34.8, 34.3, 28.2(2), 27.1; HRMS ( $m/z$ ): calcd for  $\text{C}_{19}\text{H}_{26}\text{NO}_4$  ( $[\text{M} + \text{H}]^+$ ) 318.1700, found 318.1699.

### Synthesis of (+)-kesselringine (**4**)

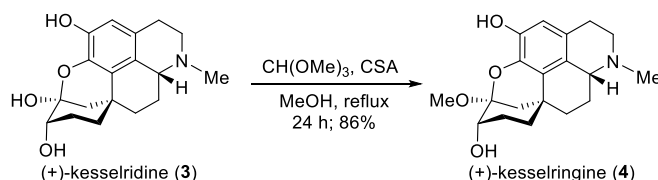

To a solution of (+)-**3** (28.0 mg, 88.2  $\mu\text{mol}$ ) in MeOH (5 mL) were added  $\text{CH(OMe)}_3$  (30.0  $\mu\text{L}$ , 0.27 mmol) and (+)-10-camphorsulfonic acid (CSA, 30.0 mg, 0.13 mmol). The reaction mixture was heated to reflux for 24 h, diluted with saturated aqueous  $\text{NaHCO}_3$  solution (10 mL), and extracted with EtOAc ( $3 \times 6\text{ mL}$ ). The combined organic phase was dried over anhydrous  $\text{Na}_2\text{SO}_4$  and concentrated in vacuo. The residue was chromatographed on silica-gel column with ethyl acetate/triethylamine (20:1) to give the product (+)-kesselringine (**4**) (25.0 mg, 86% yield) as a white solid: mp 197–198 °C (lit.<sup>5</sup>

194–196 °C);  $R_f$  0.25 (ethyl acetate/triethylamine = 30:1);  $[\alpha]_D^{25} +79.0$  ( $c$  1.0,  $\text{CHCl}_3$ ) (lit.<sup>6</sup> +93 ( $c$  1.0,  $\text{CHCl}_3$ )); IR (KBr):  $\nu_{\text{max}} = 3473, 2953, 2928, 2868, 1595, 1503, 1462, 1377, 1272, 1189, 1059, 813, 723, 698 \text{ cm}^{-1}$ ;  $^1\text{H}$  NMR (400 MHz,  $\text{CDCl}_3$ )  $\delta$ : 6.56 (s, 1H), 5.51 (brs, 1H), 3.75 (m, 1H), 3.42 (s, 3H), 3.13–2.89 (m, 3H), 2.65–2.50 (m, 2H), 2.46 (s, 3H), 2.36–2.23 (m, 2H), 2.02 (d,  $J = 12.4 \text{ Hz}$ , 1H), 1.88–1.68 (m, 5H), 1.57–1.49 (m, 1H), 1.46–1.31 (m, 2H);  $^{13}\text{C}$  NMR (101 MHz,  $\text{CDCl}_3$ )  $\delta$ : 142.2, 139.9, 125.4, 123.2, 112.5, 102.8, 77.2, 70.9, 60.2, 53.6, 49.4, 43.5, 34.6, 34.1, 34.0, 33.3, 28.4, 27.1, 26.3; HRMS ( $m/z$ ): calcd for  $\text{C}_{19}\text{H}_{26}\text{NO}_4$  ( $[\text{M} + \text{H}]^+$ ) 332.1856, found 332.1859.

### Synthesis of compound (+)-jolantidine (5)

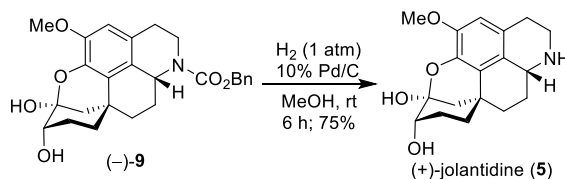

To a solution of compound (–)-**9** (41.0 mg, 91.8  $\mu\text{mol}$ ) in MeOH (5 mL) was added Pd/C (9.0 mg), and the suspension mixture was stirred at room temperature under ambient  $\text{H}_2$  pressure for 6 h. The mixture was then filtered through a pad of Florisil and concentrated in vacuo. The residue was chromatographed on silica-gel column with dichloromethane/methanol (3:1) to give the product (+)-jolantidine (**5**) (21.0 mg, 75% yield) as a white solid: mp 269–270 °C (lit.<sup>7</sup> 275–277 °C);  $R_f$  0.53 (dichloromethane/methanol = 3:1);  $[\alpha]_D^{25} +90.5$  ( $c$  0.4, MeOH) (lit.<sup>7</sup> +102 ( $c$  0.4, MeOH)); IR (KBr):  $\nu_{\text{max}} = 3454, 3298, 2925, 2853, 1598, 1484, 1445, 1368, 1265, 1173, 1051, 1013, 737, 702 \text{ cm}^{-1}$ ;  $^1\text{H}$  NMR (400 MHz,  $\text{CD}_3\text{OD}$ )  $\delta$ : 6.61 (s, 1H), 3.77 (s, 3H), 3.75–3.72 (m, 1H), 3.72–3.70 (m, 1H), 3.26–3.19 (m, 1H), 3.02 (td,  $J = 11.2, 4.4 \text{ Hz}$ , 1H), 2.98–2.88 (m, 1H), 2.71–2.65 (m, 1H), 2.18 (d,  $J = 12.4 \text{ Hz}$ , 1H), 2.15–2.09 (m, 1H), 1.83–1.67 (m, 3H), 1.65–1.58 (m, 1H), 1.54 (d,  $J = 12.4 \text{ Hz}$ , 1H), 1.47–1.35 (m, 3H);  $^{13}\text{C}$  NMR (101 MHz,  $\text{CD}_3\text{OD}$ )  $\delta$ : 147.4, 143.6, 127.6, 125.8, 124.8, 111.9, 100.7, 72.1, 56.5, 52.5, 44.0, 39.5, 36.0, 34.8, 34.5, 29.2, 28.8, 28.2; HRMS ( $m/z$ ): calcd for  $\text{C}_{18}\text{H}_{24}\text{NO}_4$  ( $[\text{M} + \text{H}]^+$ ) 318.1700, found 318.1697.

### Synthesis of (+)-regelinine (6)

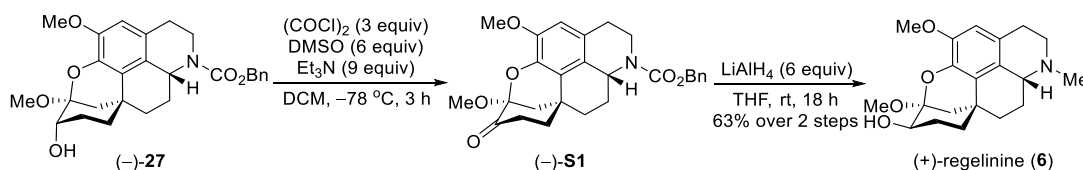

To a solution of oxalyl chloride (0.10 mL, 1.10 mmol) in  $\text{CH}_2\text{Cl}_2$  (1 mL) was added slowly the solution of DMSO (0.16 mL, 2.20 mmol) in  $\text{CH}_2\text{Cl}_2$  (1 mL) at  $-78^\circ\text{C}$ . A solution of (–)-**27** (0.17 g, 0.37 mmol) in  $\text{CH}_2\text{Cl}_2$  (3 mL) was added dropwise at the same temperature and the reaction mixture was stirred for 2 h. Subsequently, triethylamine (0.46 mL, 3.30 mmol) was added dropwise at  $-78^\circ\text{C}$ . The reaction mixture was stirred for 1 h, warmed to room temperature naturally, and quenched with water (5 mL), extracted with  $\text{CH}_2\text{Cl}_2$  ( $3 \times 10 \text{ mL}$ ). The combined organic phase was dried over  $\text{Na}_2\text{SO}_4$ , and concentrated in vacuo. The residue was chromatographed on silica-gel column with petroleum ether/ethyl acetate (2:1) to give the product (–)-**S1** (0.16 g, 96% yield) as a white solid, mp 75–77 °C;  $R_f$  0.43 (petroleum ether/ethyl acetate = 1:1);  $[\alpha]_D^{25} +150$  ( $c$  1.0,  $\text{CHCl}_3$ ); IR (KBr):  $\nu_{\text{max}} = 2945, 2840, 1734, 1697, 1488, 1424, 1278, 1206, 1085, 983, 735, 699 \text{ cm}^{-1}$ ;  $^1\text{H}$  NMR (400 MHz,  $\text{CDCl}_3$ )  $\delta$ : 7.44–



7.30 (m, 5H), 6.67 (dd,  $J = 10.0, 3.2$  Hz, 0.2), 6.66–6.57 (m, 1H), 5.88 (m, 0.2H), 5.30–5.09 (m, 2H), 4.95 (m, 0.2H), 4.82 (m, 0.6H), 4.57 (m, 0.13H), 4.43 (d,  $J = 12.4$  Hz, 0.69H), 3.85 (m, 3H), 3.62 (m, 3H), 3.49–3.28 (m, 0.65H), 2.97–2.74 (m, 2H), 2.66–2.56 (m, 0.8H), 2.46–2.12 (m, 5.1H), 2.00–1.72 (m, 3.5H), 1.63–1.46 (m, 0.9H);  $^{13}\text{C}$  NMR (101 MHz,  $\text{CDCl}_3$ )  $\delta$ : 202.1, 156.4, 146.6, 141.1, 136.8, 128.6, 128.1(2), 123.8, 121.6, 112.6, 111.1, 99.3, 67.2, 56.2, 51.2, 42.7, 40.0, 39.1, 37.1, 36.3, 34.9, 34.5, 32.6, 29.9; HRMS ( $m/z$ ): calcd for  $\text{C}_{27}\text{H}_{30}\text{NO}_6$  ( $[\text{M} + \text{H}]^+$ ) 464.2068, found 464.2066.

To the solution of (–)-**S1** in THF (8 mL) was added  $\text{LiAlH}_4$  (83.5 mg, 2.20 mmol), and the resulting mixture was stirred at room temperature for 24 h. The reaction was then quenched by slow addition of  $\text{H}_2\text{O}$  (8 mL), and the mixture was extracted with EtOAc ( $3 \times 8$  mL). The combined organic phase was dried over anhydrous  $\text{Na}_2\text{SO}_4$  and concentrated in vacuo. The residue was chromatographed on silica-gel column with ethyl acetate/triethylamine (30:1) to give (+)-regelinine (**6**) (80.0 mg, 63% yield over 2 steps) as a white solid: mp 252–253 °C (lit.<sup>8</sup> 253–254 °C);  $R_f$  0.32 (ethyl acetate/triethylamine = 20:1);  $[\alpha]_D^{25} +110.4$  ( $c$  1.0,  $\text{CHCl}_3$ ); IR (KBr):  $\nu_{\text{max}} = 3348, 2942, 2844, 1599, 1486, 1454, 1244, 1076, 976, 889, 730$   $\text{cm}^{-1}$ ;  $^1\text{H}$  NMR (400 MHz,  $\text{CDCl}_3$ )  $\delta$ : 6.51 (s, 1H), 3.83 (s, 3H), 3.72 (dd,  $J = 11.2, 5.2$  Hz, 1H), 3.41 (s, 3H), 3.12–2.96 (m, 2H), 2.90 (dd,  $J = 10.0, 5.2$  Hz, 1H), 2.73–2.56 (m, 2H), 2.50 (td,  $J = 11.2, 4.0$  Hz, 1H), 2.44 (s, 3H), 2.30–2.23 (m, 1H), 2.15 (dd,  $J = 12.8, 2.8$  Hz, 1H), 1.92–1.83 (m, 1H), 1.82–1.68 (m, 3H), 1.59–1.47 (m, 2H), 1.44–1.27 (m, 2H);  $^{13}\text{C}$  NMR (101 MHz,  $\text{CDCl}_3$ )  $\delta$ : 146.0, 142.4, 126.0, 124.6, 123.5, 110.0, 100.8, 75.5, 60.2, 55.9, 53.7, 49.4, 43.7, 37.6, 37.4, 34.9, 34.0, 28.9, 28.1, 27.2; HRMS ( $m/z$ ): calcd for  $\text{C}_{20}\text{H}_{28}\text{NO}_4$  ( $[\text{M} + \text{H}]^+$ ) 346.2013, found 346.2013.

## References

- Chen, J.-Q.; Xie, J.-H.; Bao, D.-H.; Liu, S.; Zhou, Q.-L. Total synthesis of (–)-galanthamine and (–)-lycoramine via catalytic asymmetric hydrogenation and intramolecular reductive Heck cyclization. *Org. Lett.* **2012**, *14*, 2714–2717.
- Abdullaeva, D. A.; Yusupov M. K.; Aslanov, K. A. The structure of regeline. *Chem. Nat. Comp.* **1976**, *12*, 702–705.
- Yusupov, M. K.; Abdullaeva, D. A.; Aslanov, K. A.; Sadykov, A. S. The structure of regalamine. *Chem. Nat. Comp.* **1975**, *11*, 395–397.
- Kasimov, K.; Yusupov, M. K.; Timbekov É. K.; Aslanov, K. A. Structure of kesselridine. *Chem. Nat. Comp.* **1975**, *11*, 202–205.
- Yusupov, M. K.; Sadykov, A. S. The structure of kesselringine. *Chem. Nat. Comp.* **1976**, *12*, 305–308.
- Yusupov, M. K.; Mukhamedyarova, N. L.; Sadykov, A. S.; Dolejš, L.; Sedmera P.; Šantavý, F. Constitution of the alkaloid kesselringine. *Collect. Czech. Chem. Commun.* **1977**, *42*, 1581–1587.
- Chommadov, B.; Usmanov, A. M.; Yusupov, M. K. Jolantidine — A new base from Merendera jolantae. *Chem. Nat. Comp.* **1983**, *19*, 755.
- Yusupov, M. K.; Chommadov B.; Aslanov, K. A. The structure of regelinine. *Chem. Nat. Comp.* **1985**, *21*, 396–397.

## E) NMR Spectra of New Compounds and Pentacyclic Homoproaporphine Alkaloids

### Compound (–)-13

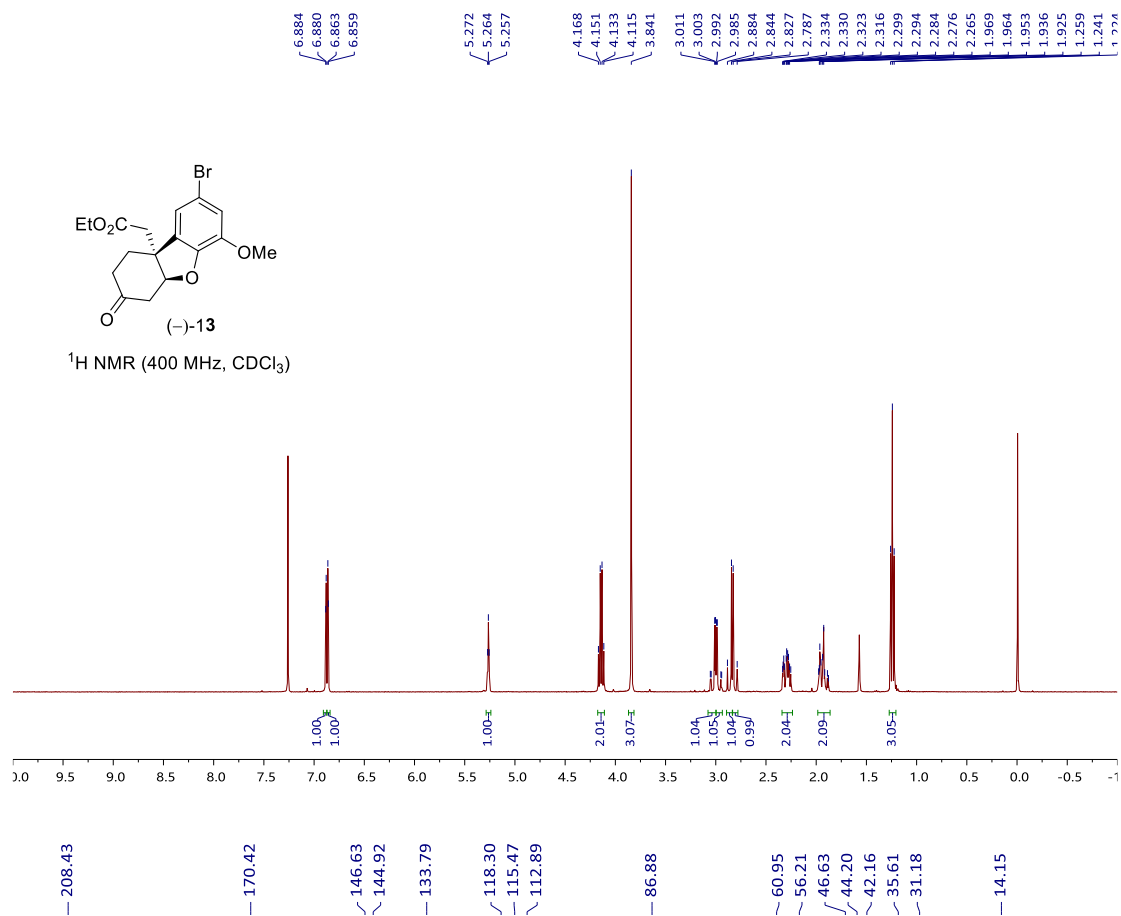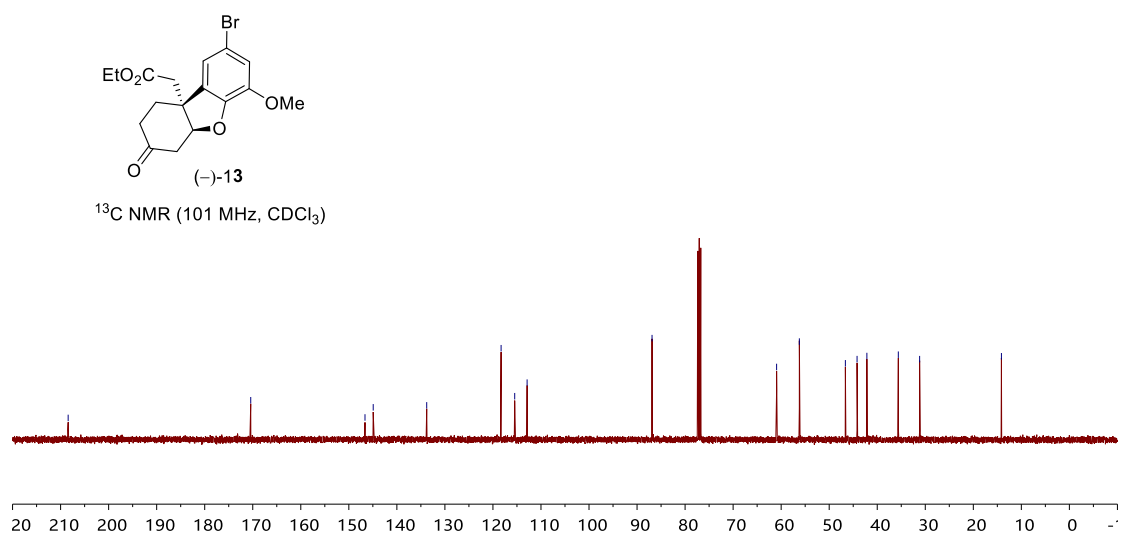

## Compound 14

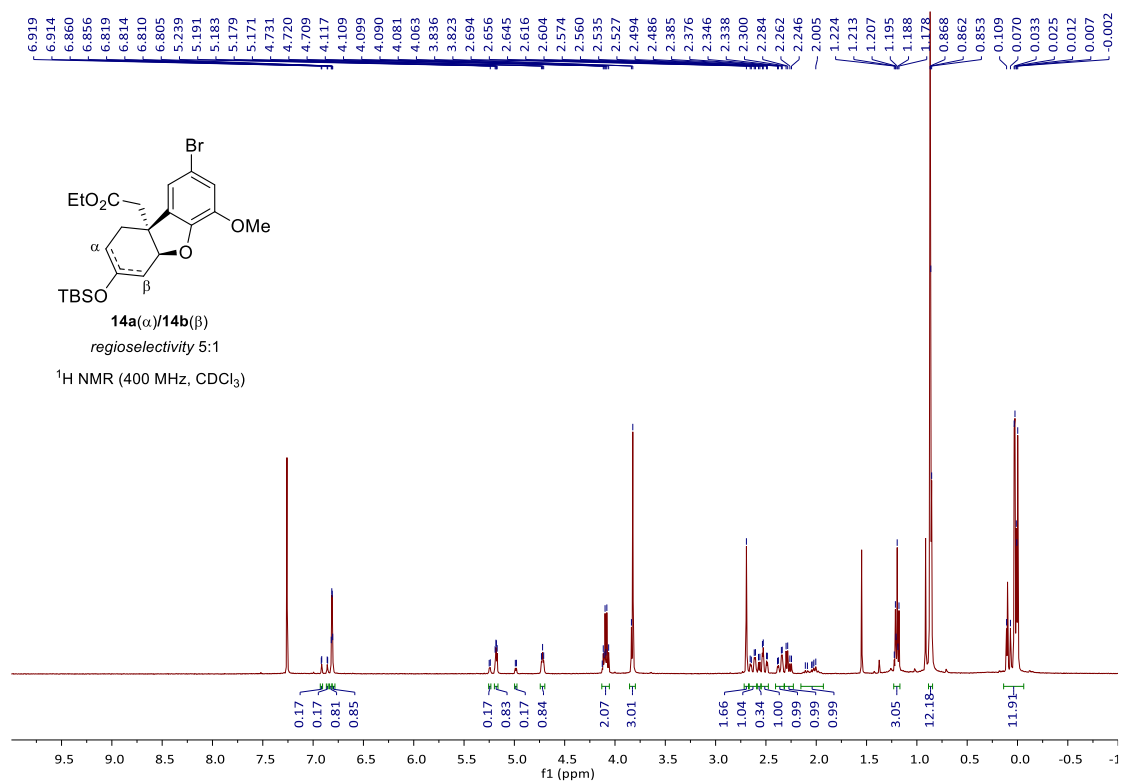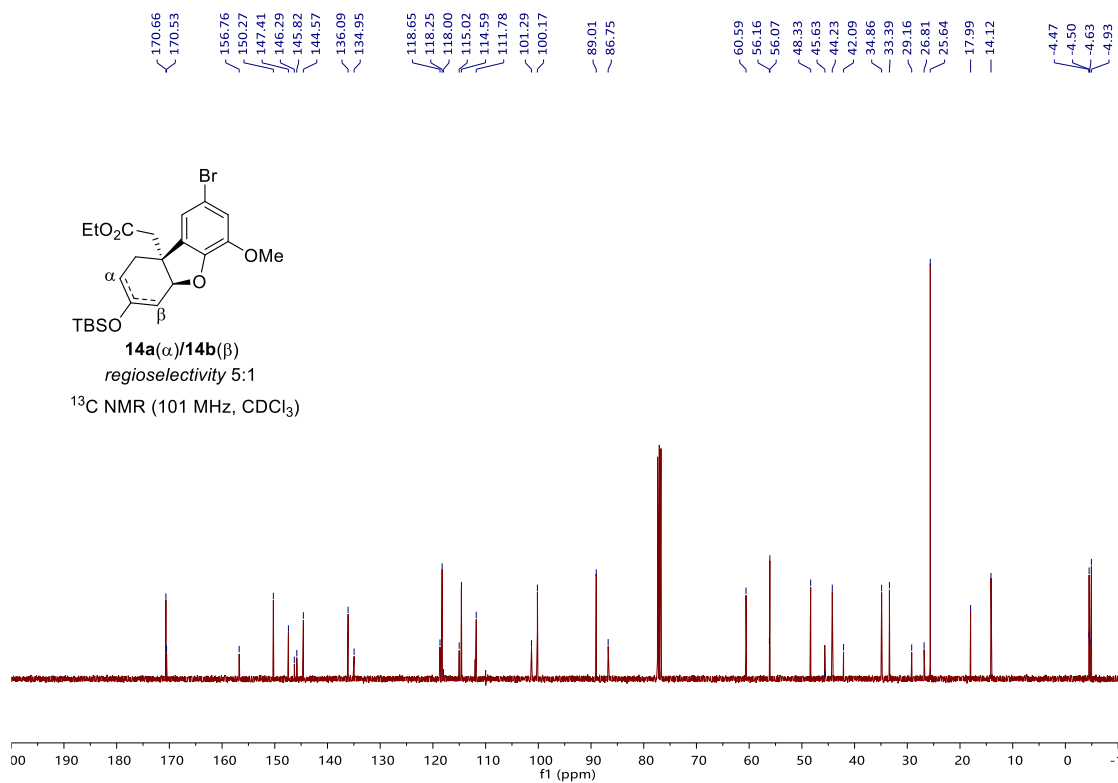

**Compound 12** (not stable)

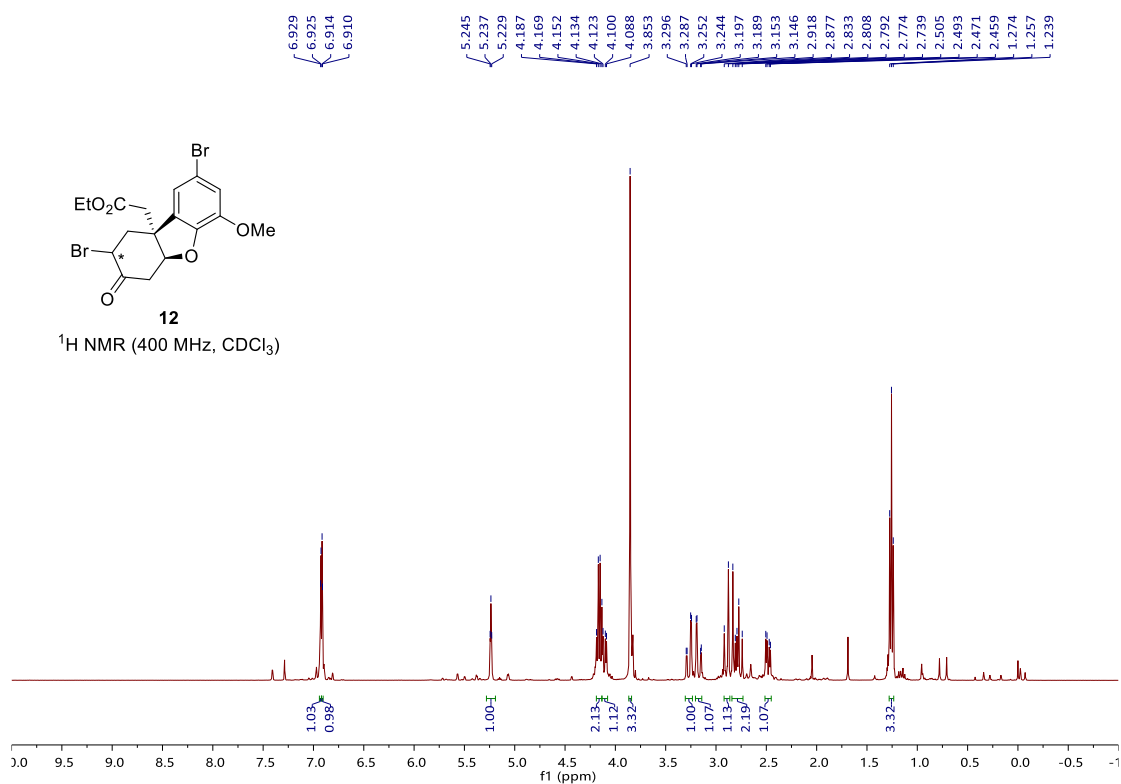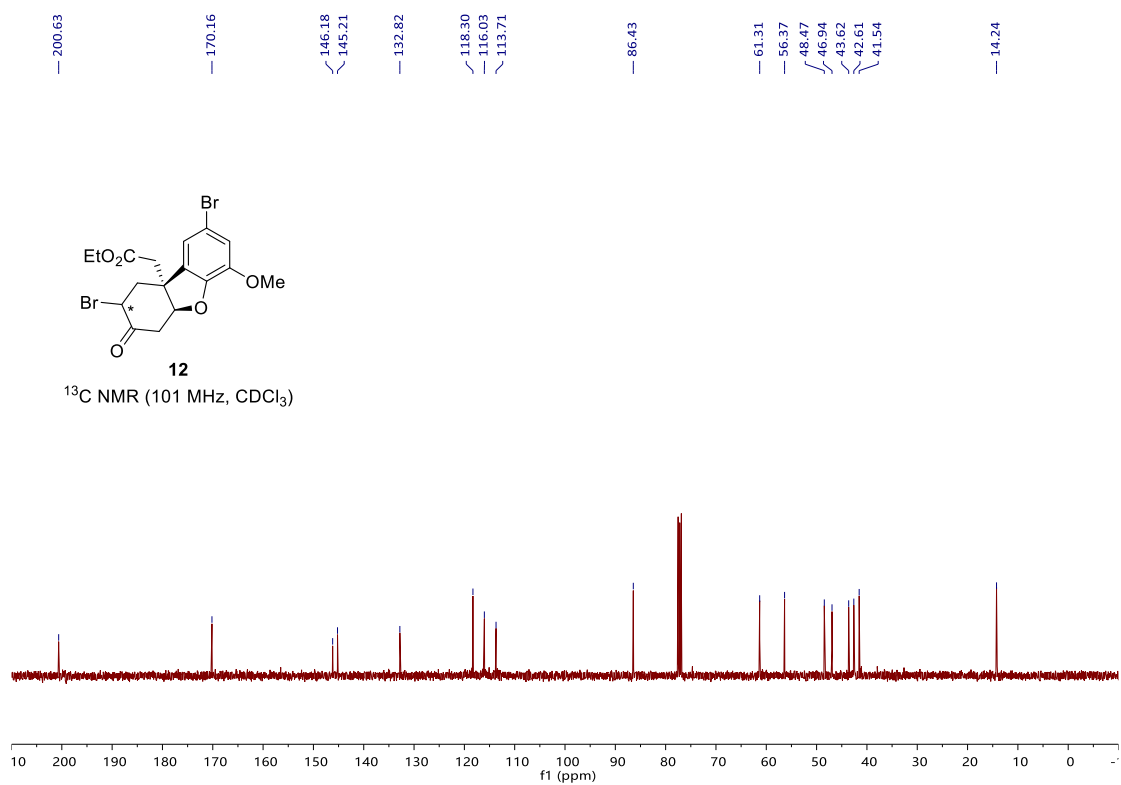

# Compound 15a

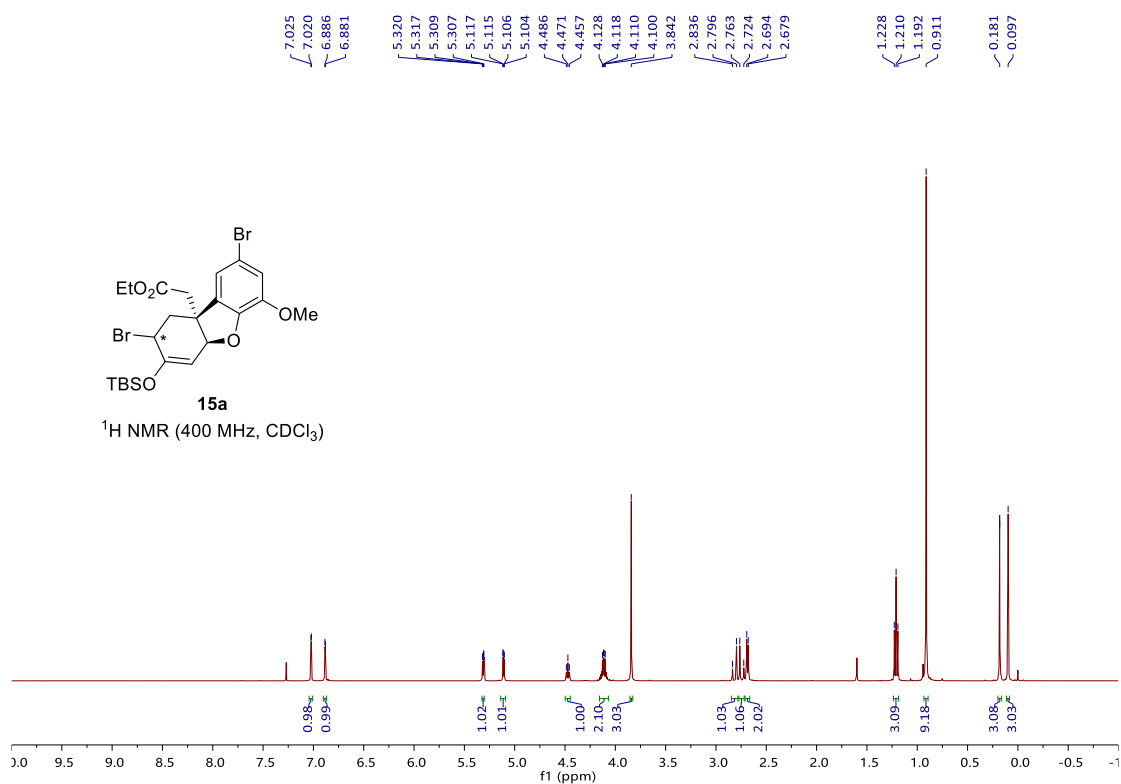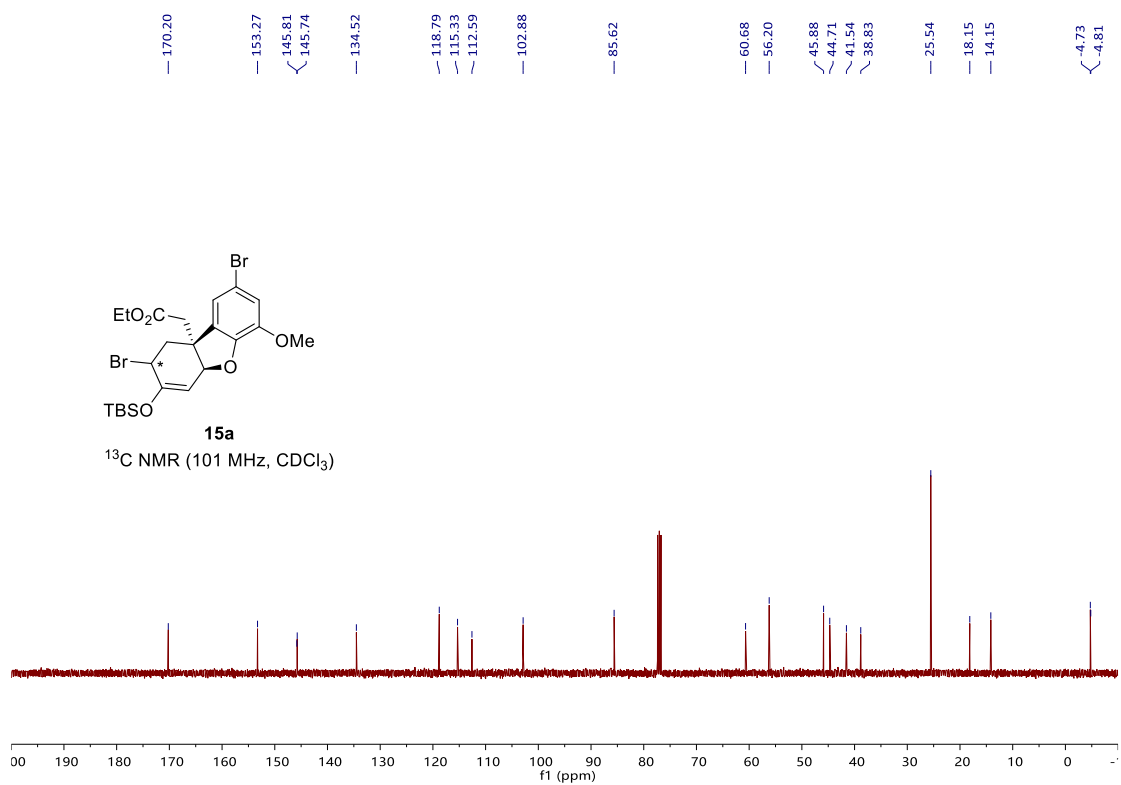

# Compound 15b

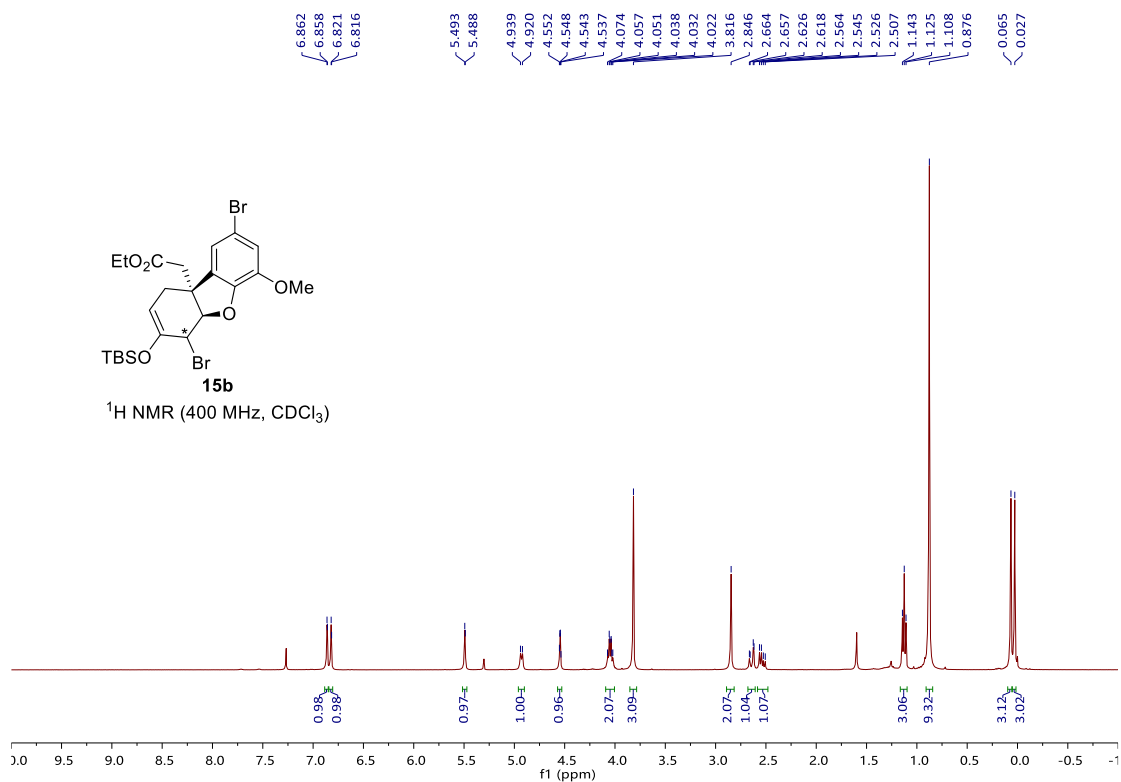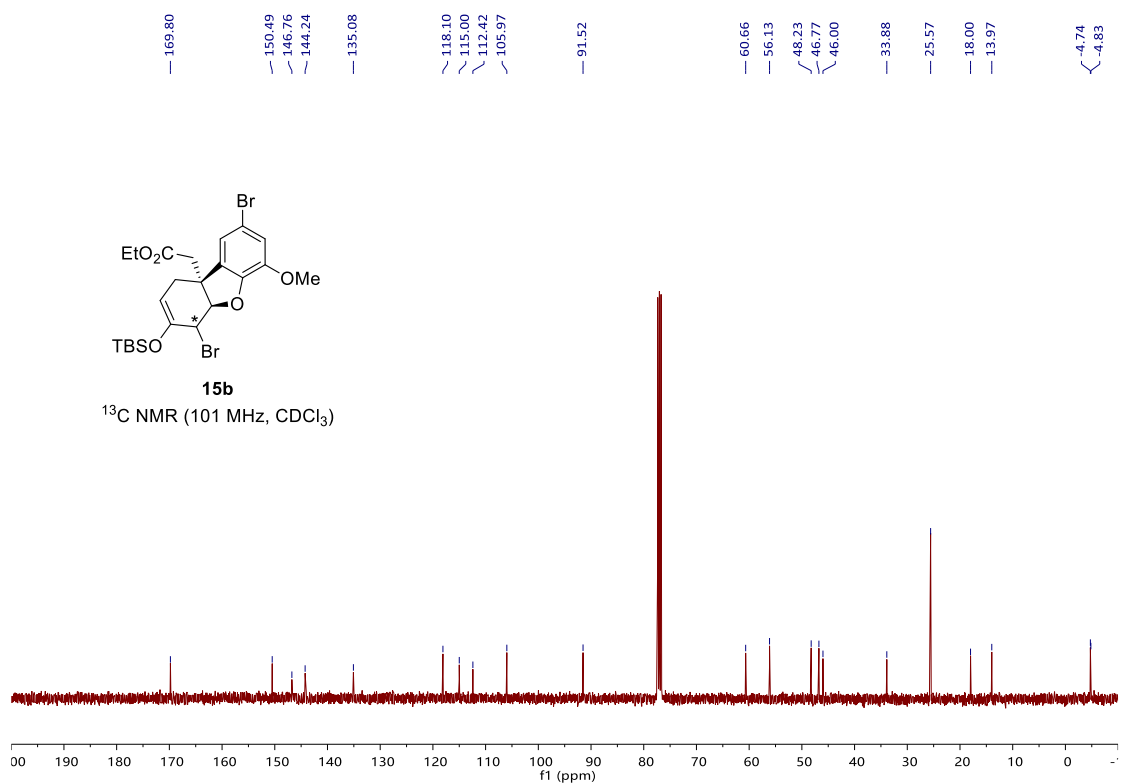

# Compound (+)-11

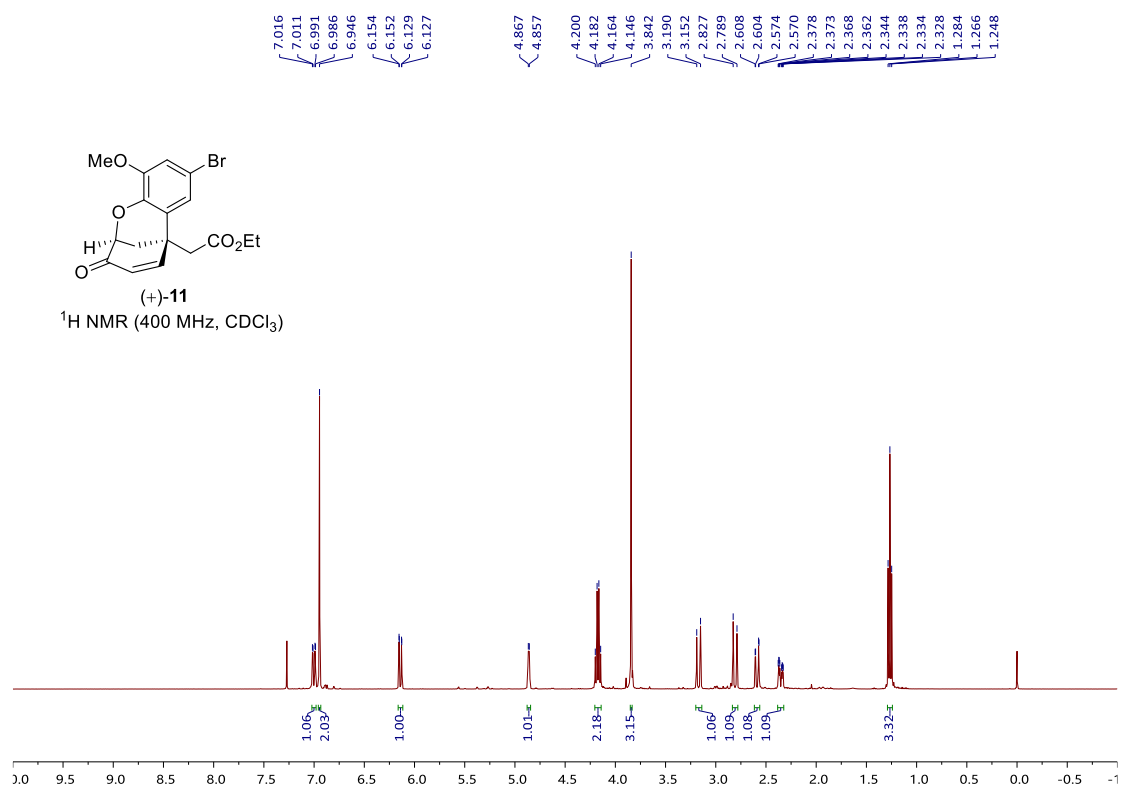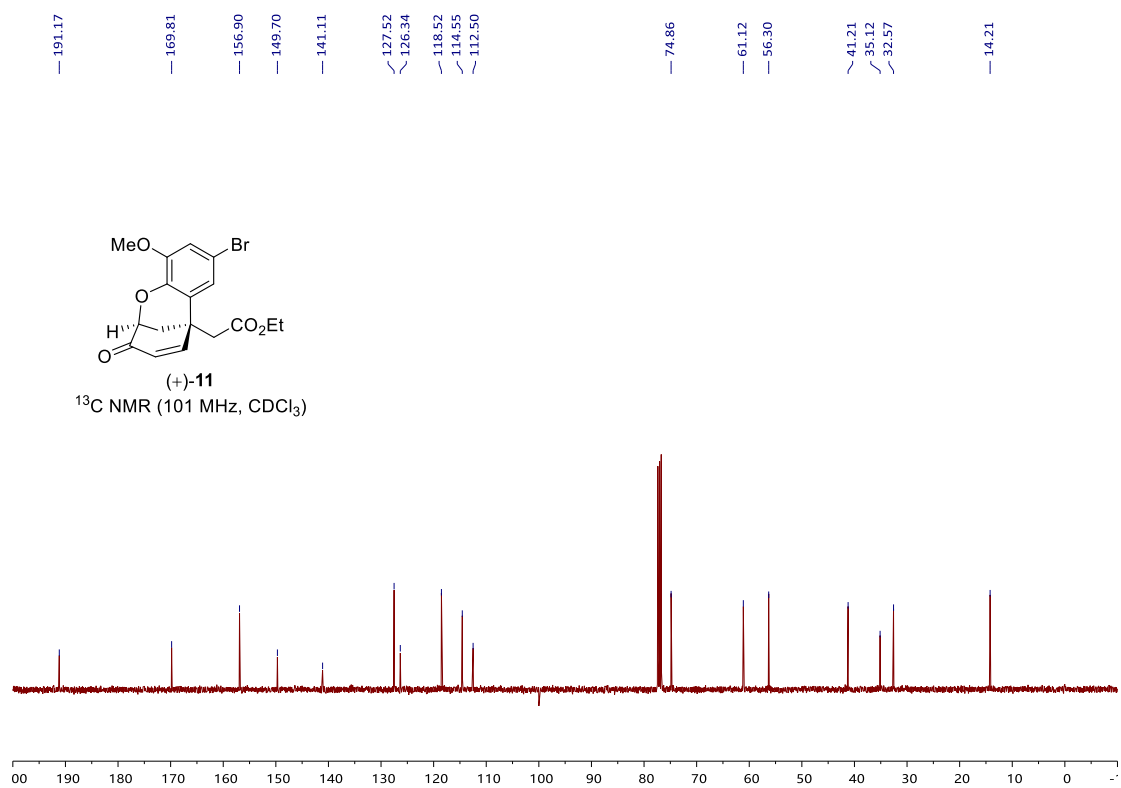

# Compound (+)-17

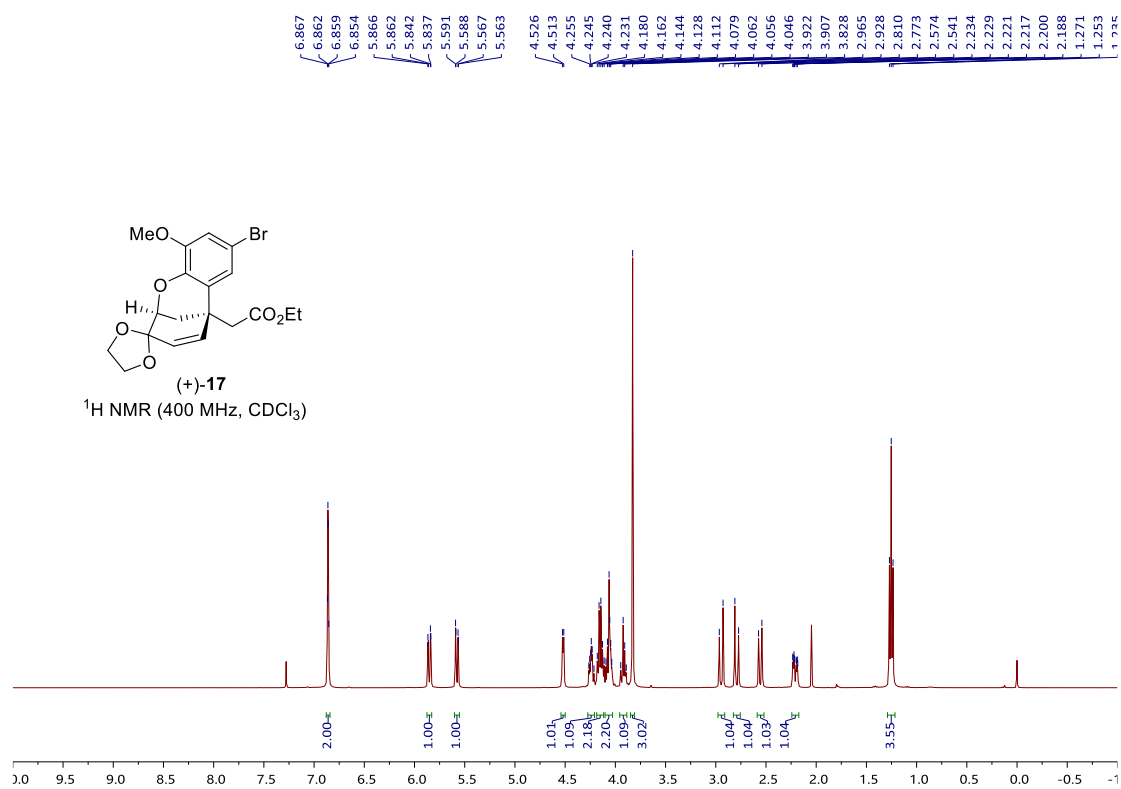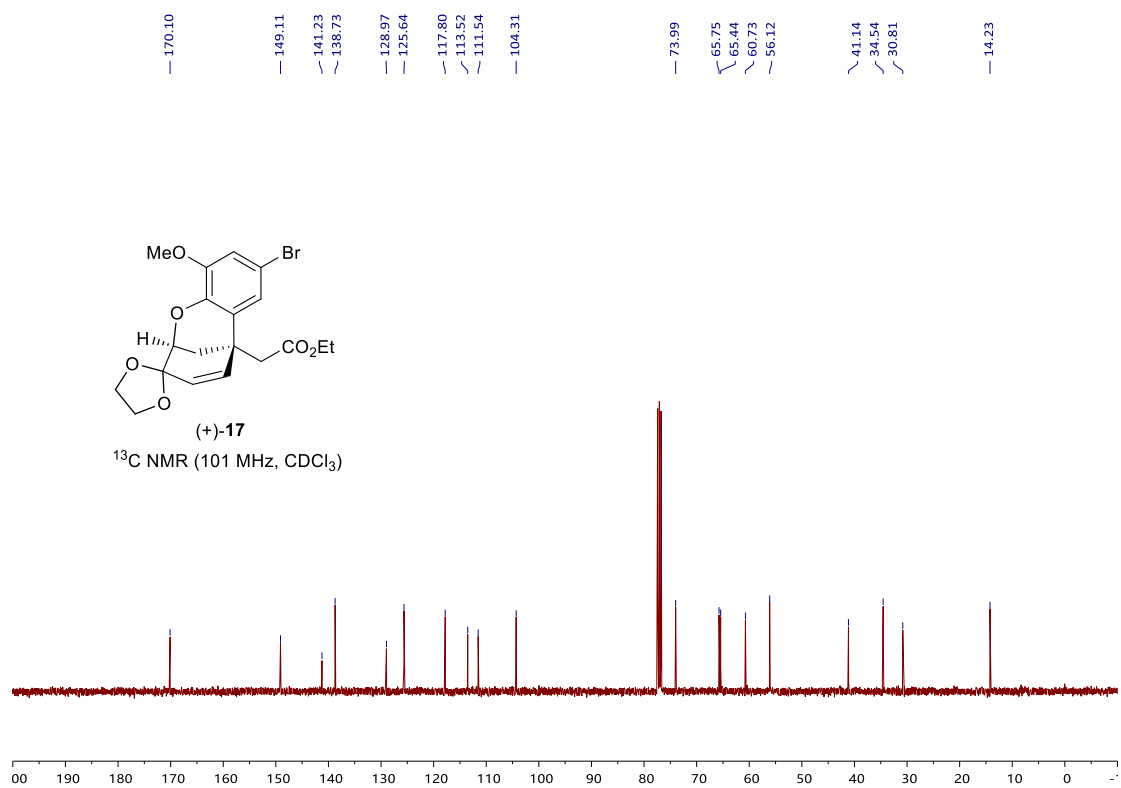



# Compound (+)-18

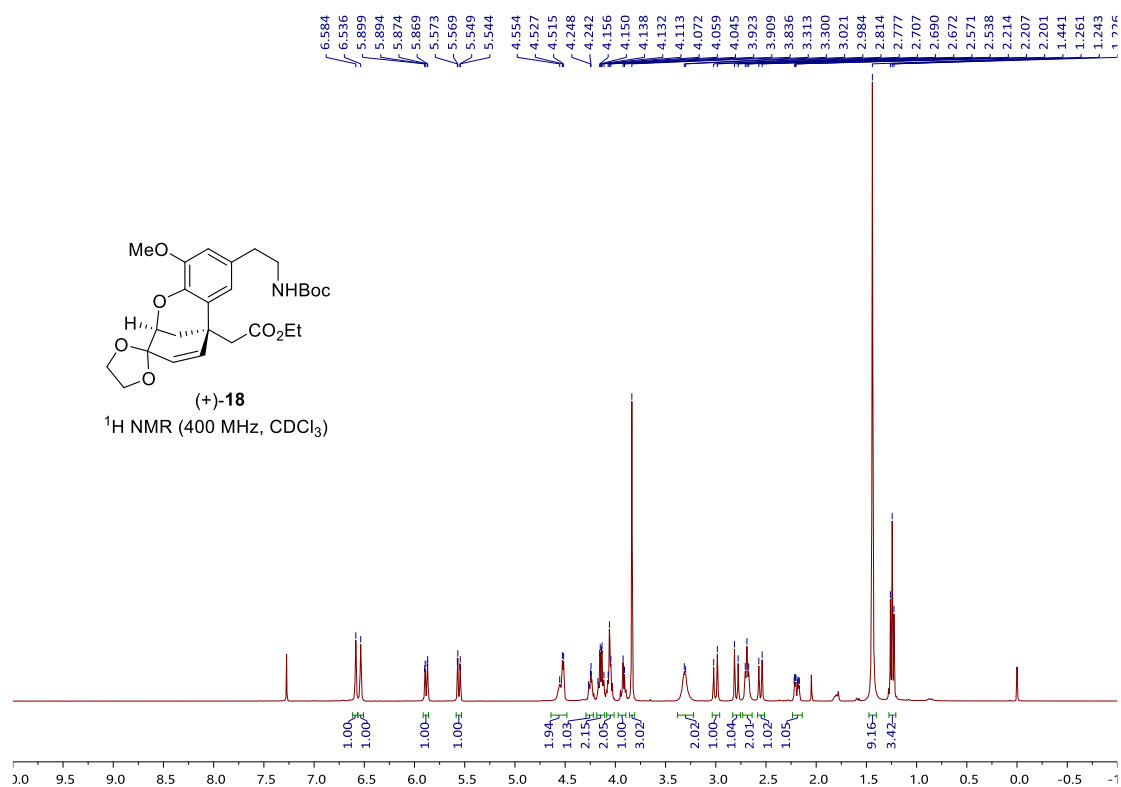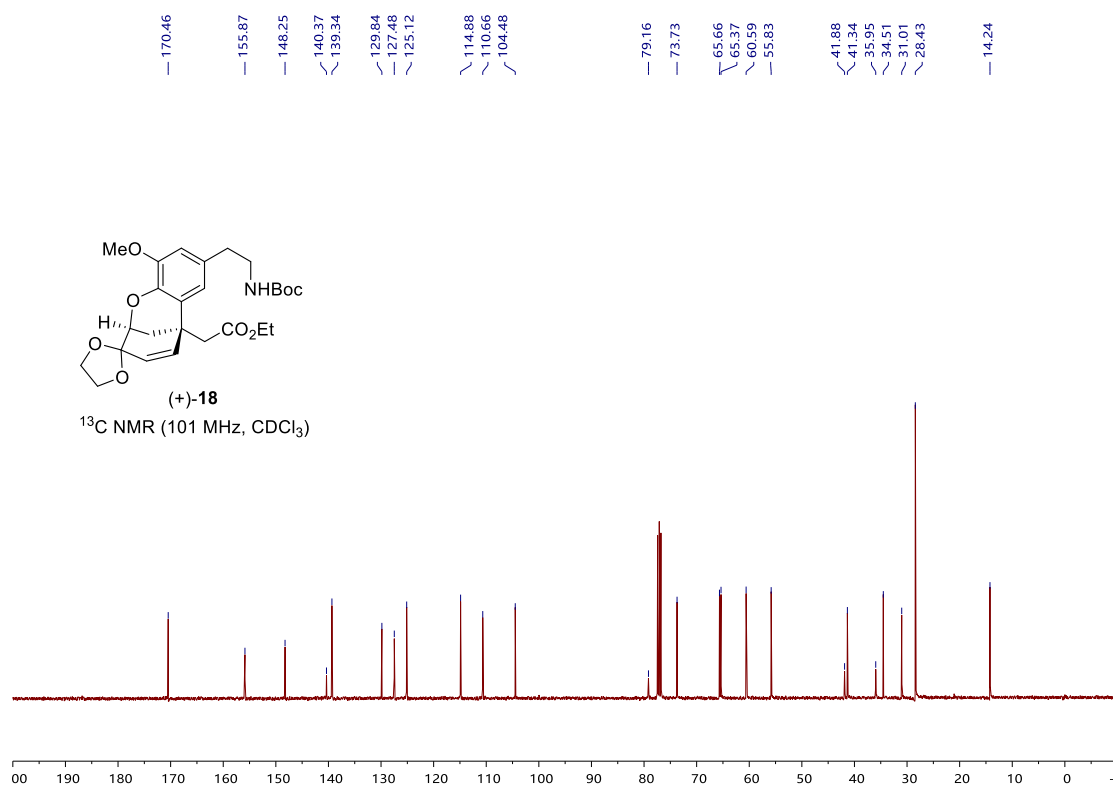

# Compound (+)-19

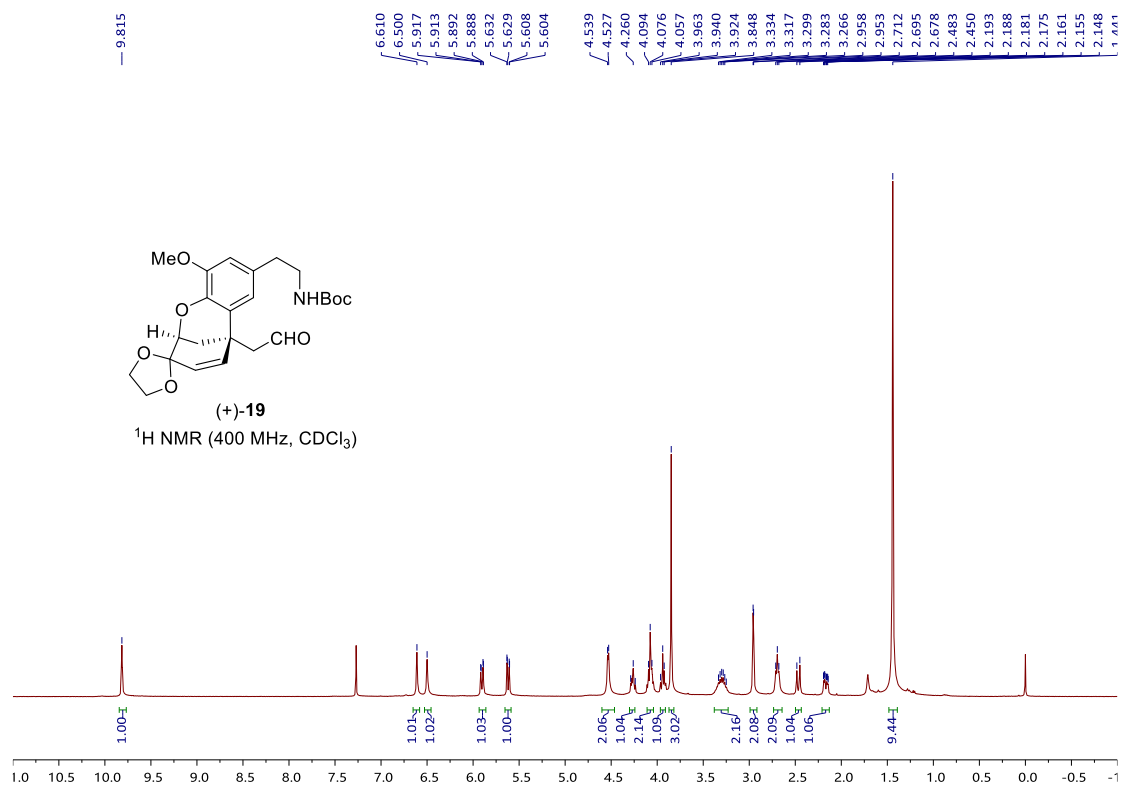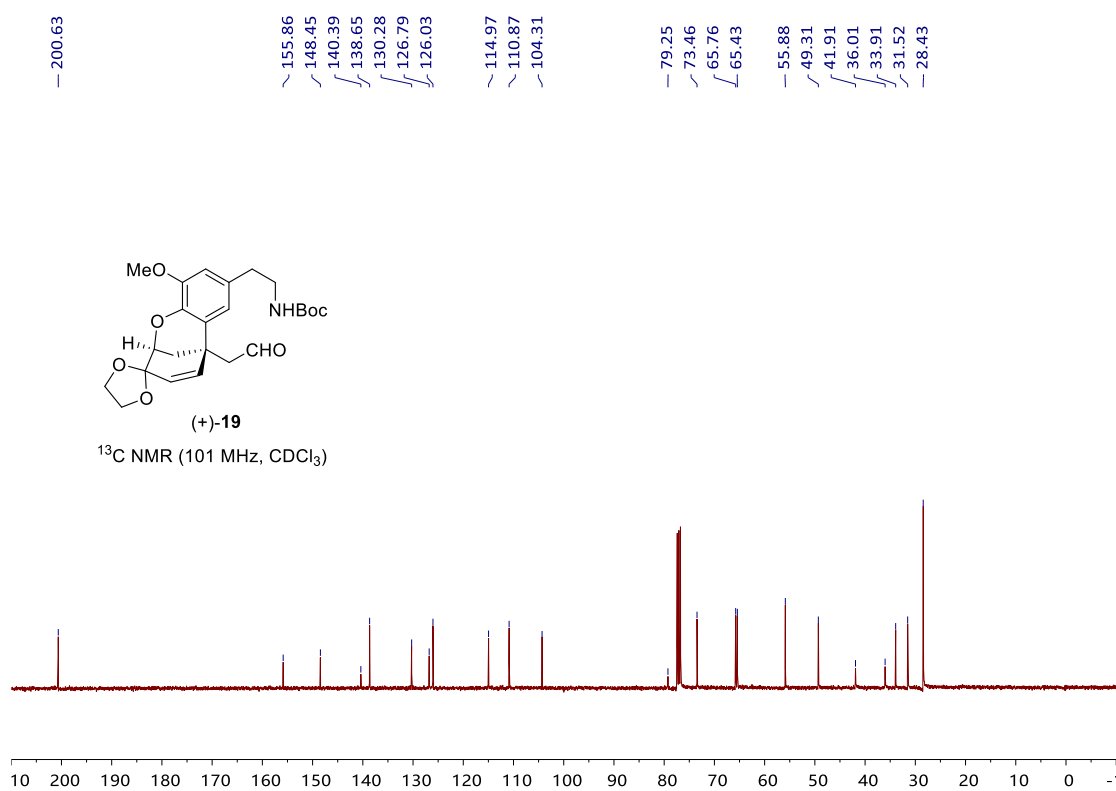

# Compound (+)-20

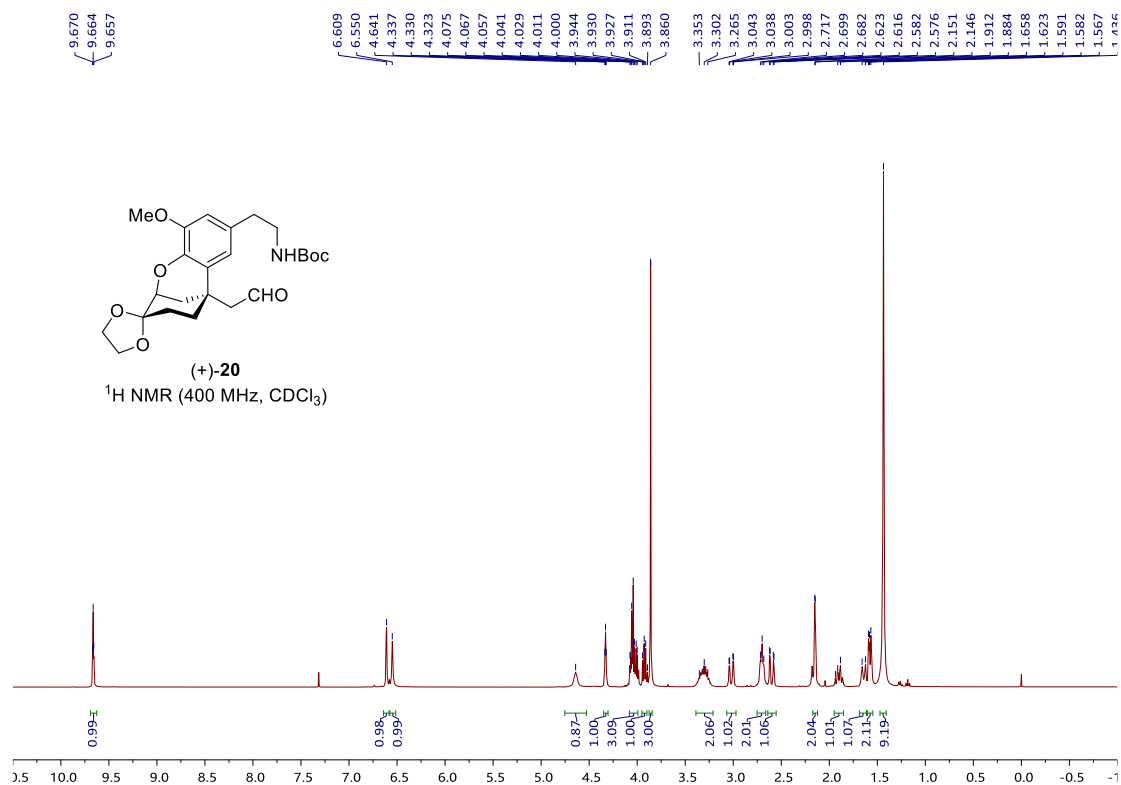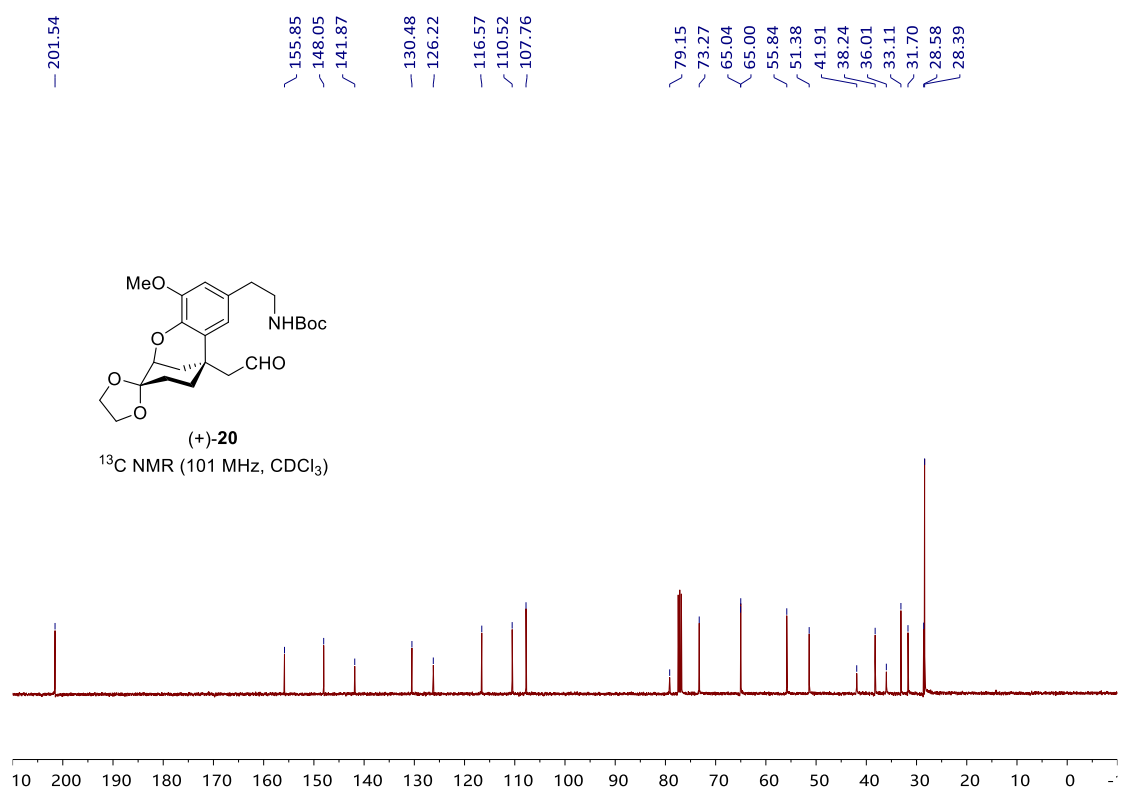

**Compound (+)-21** (a mixture of *Z* and *E* isomers in a ratio of 44:56)

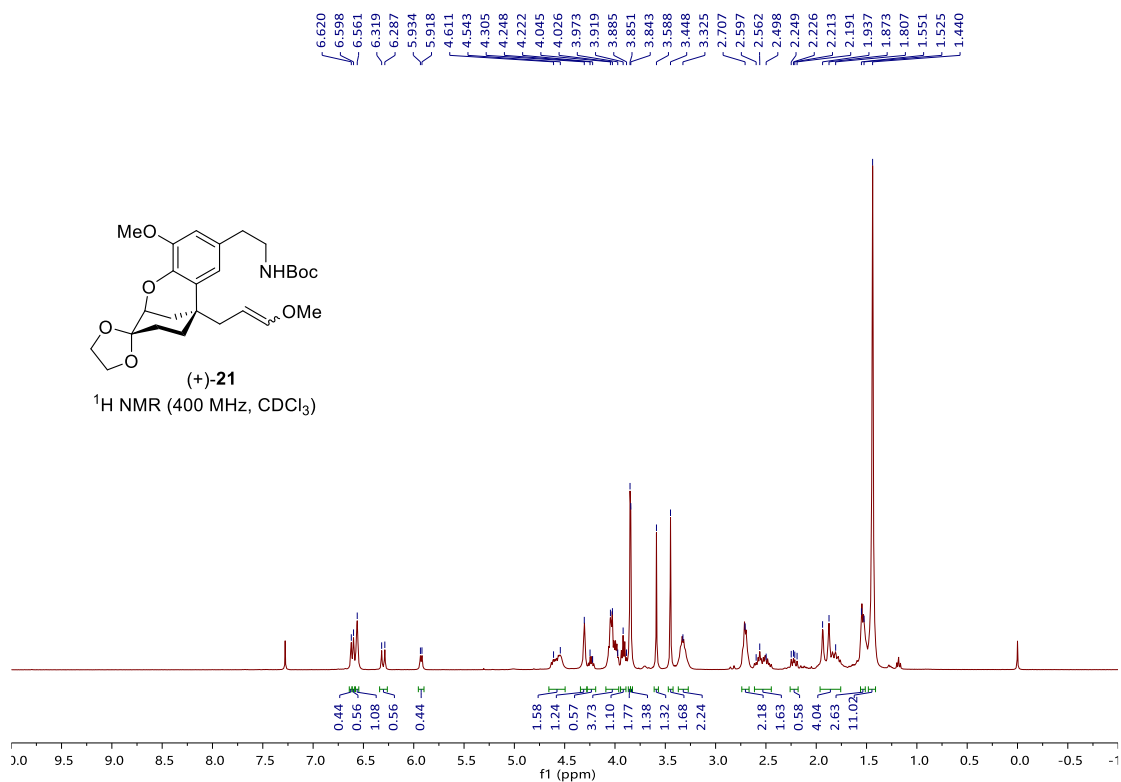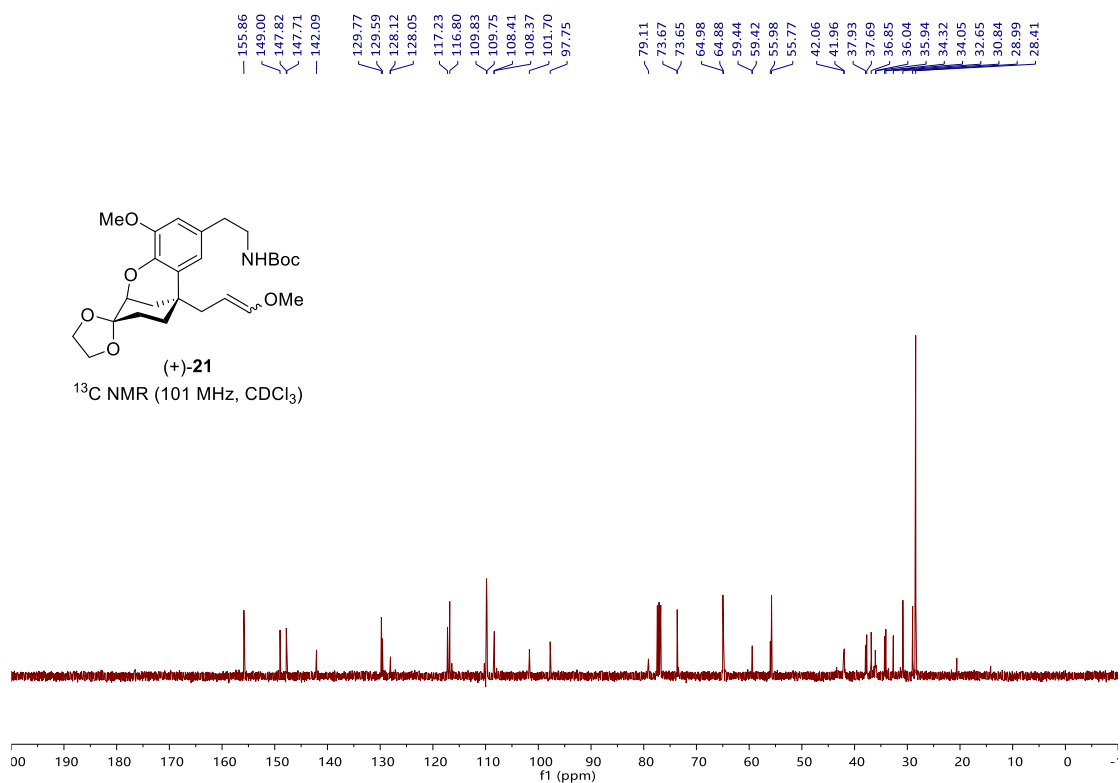

**Compound (+)-10 (with a minor diastereoisomer)**

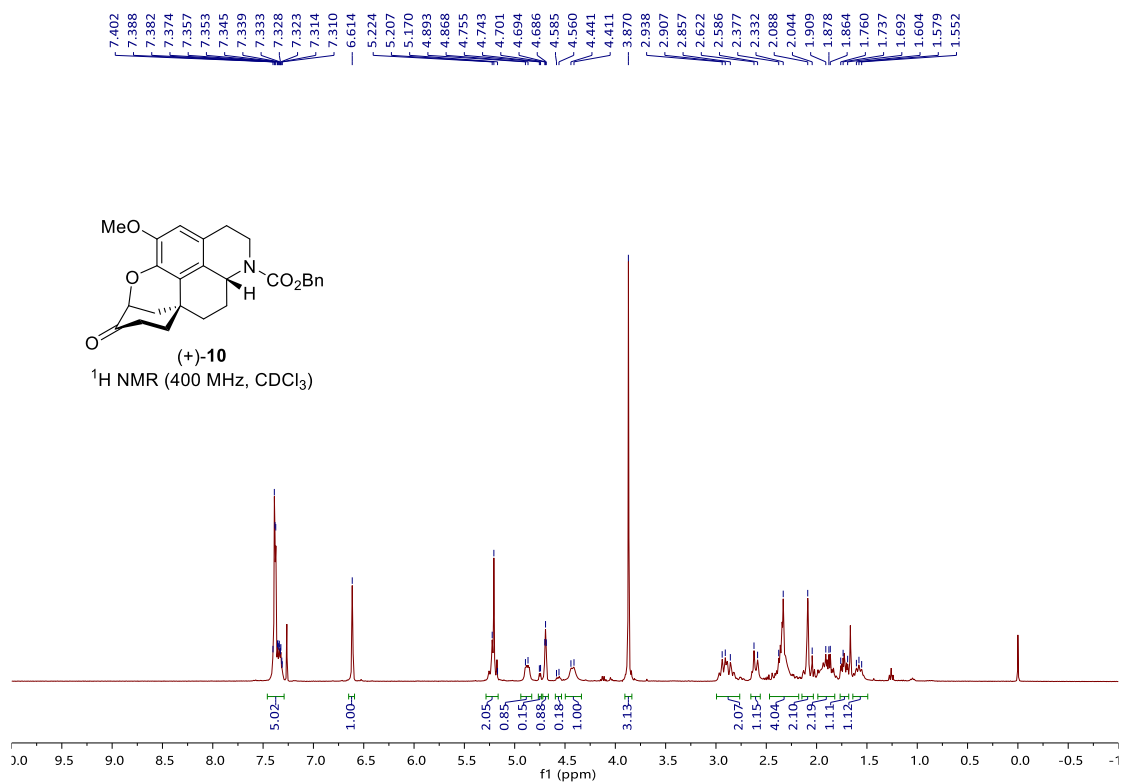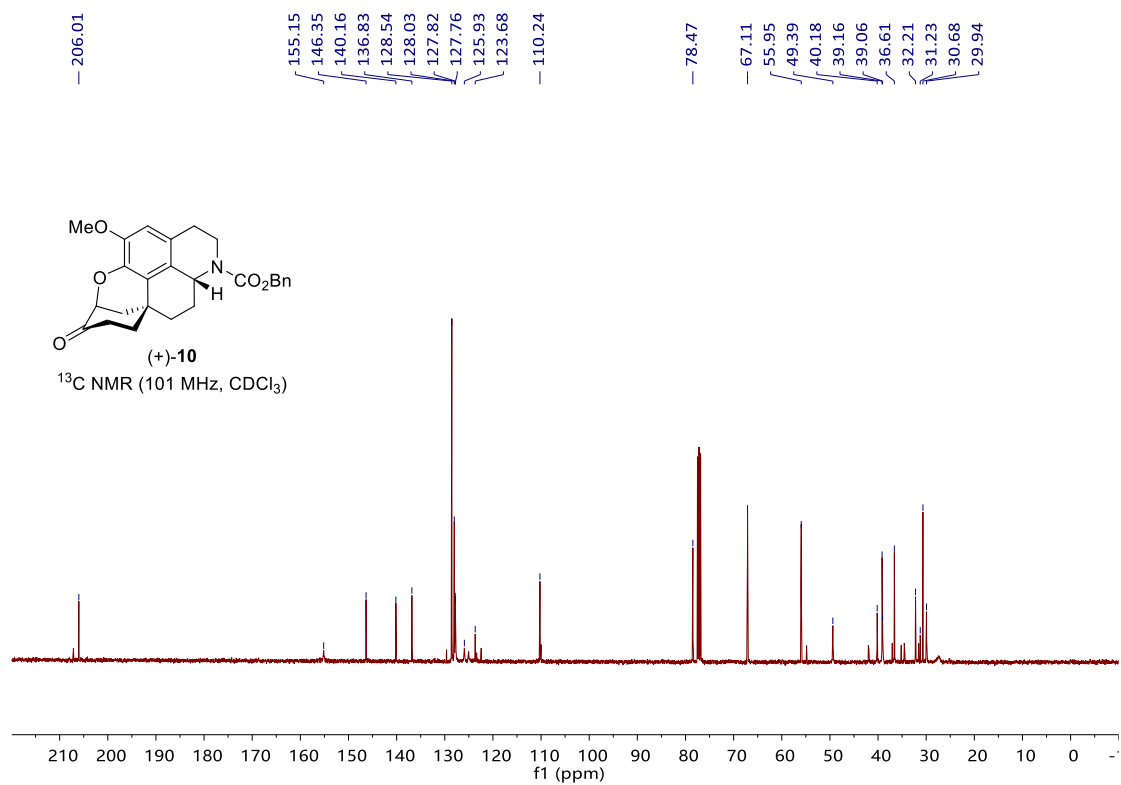

**Compound (+)-24 (with a minor diastereoisomer)**

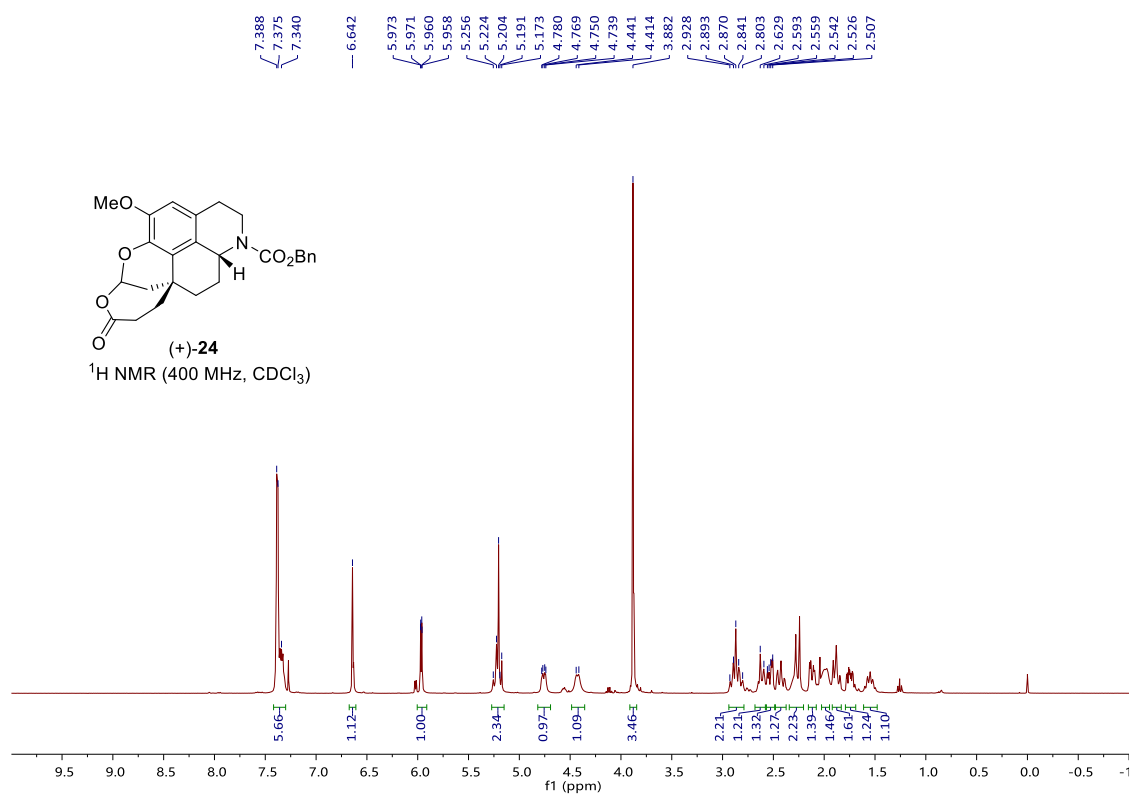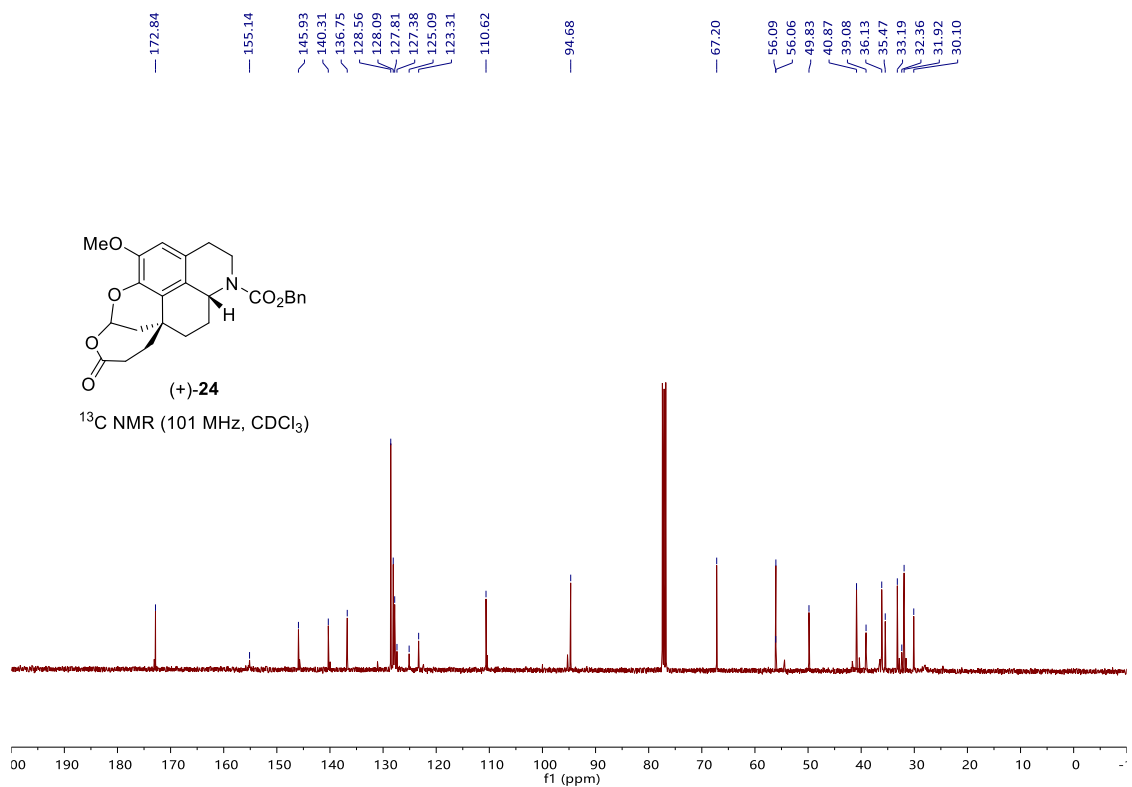

**Compound (-)-25** (not stable, with minor diastereoisomers)

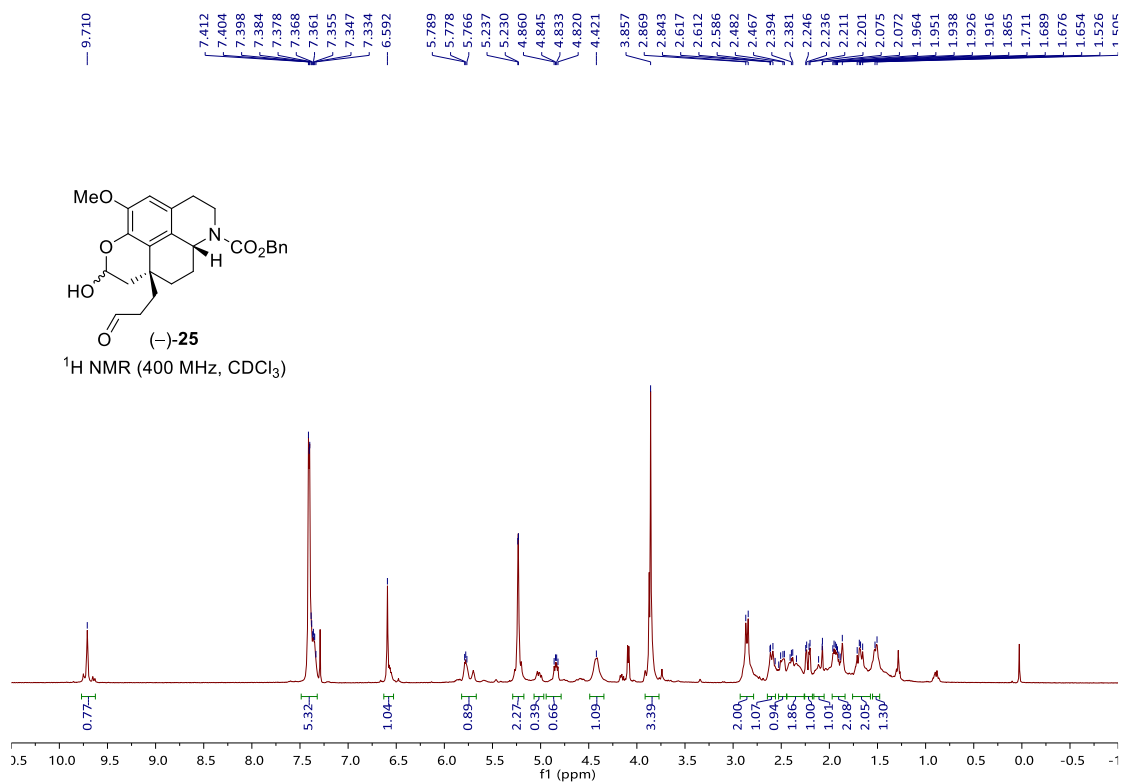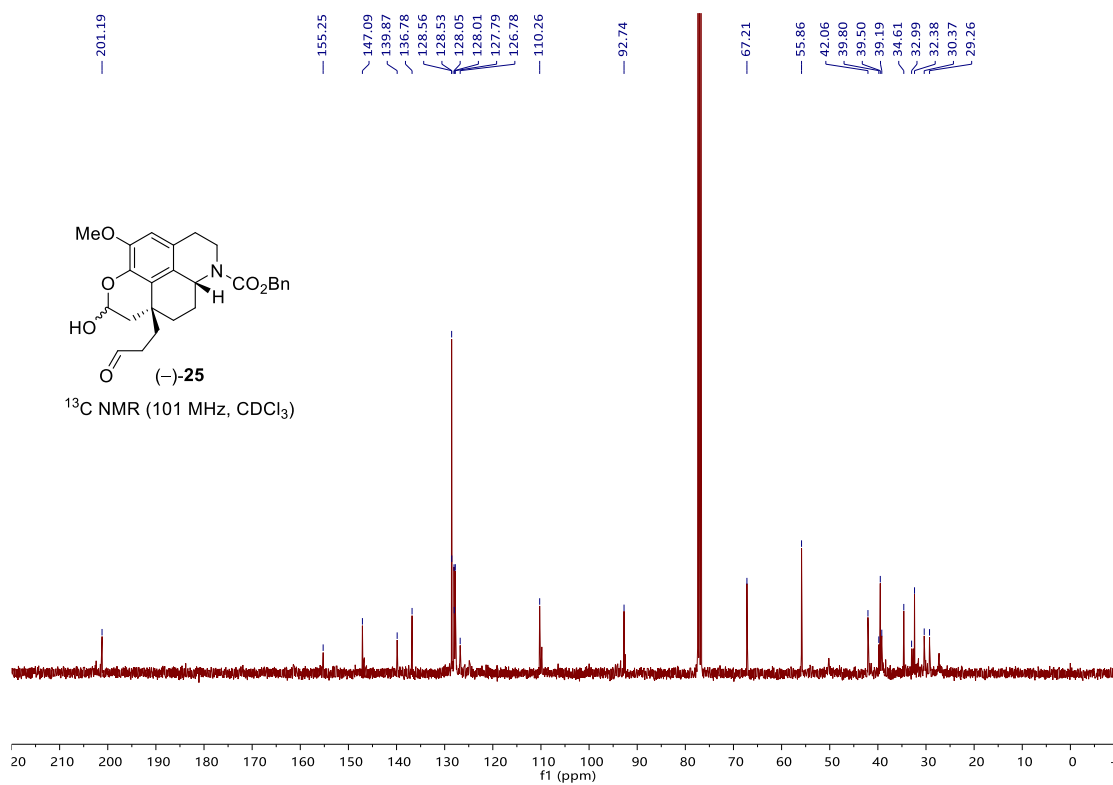

**Compound (-)-26 (with a minor diastereoisomer)**

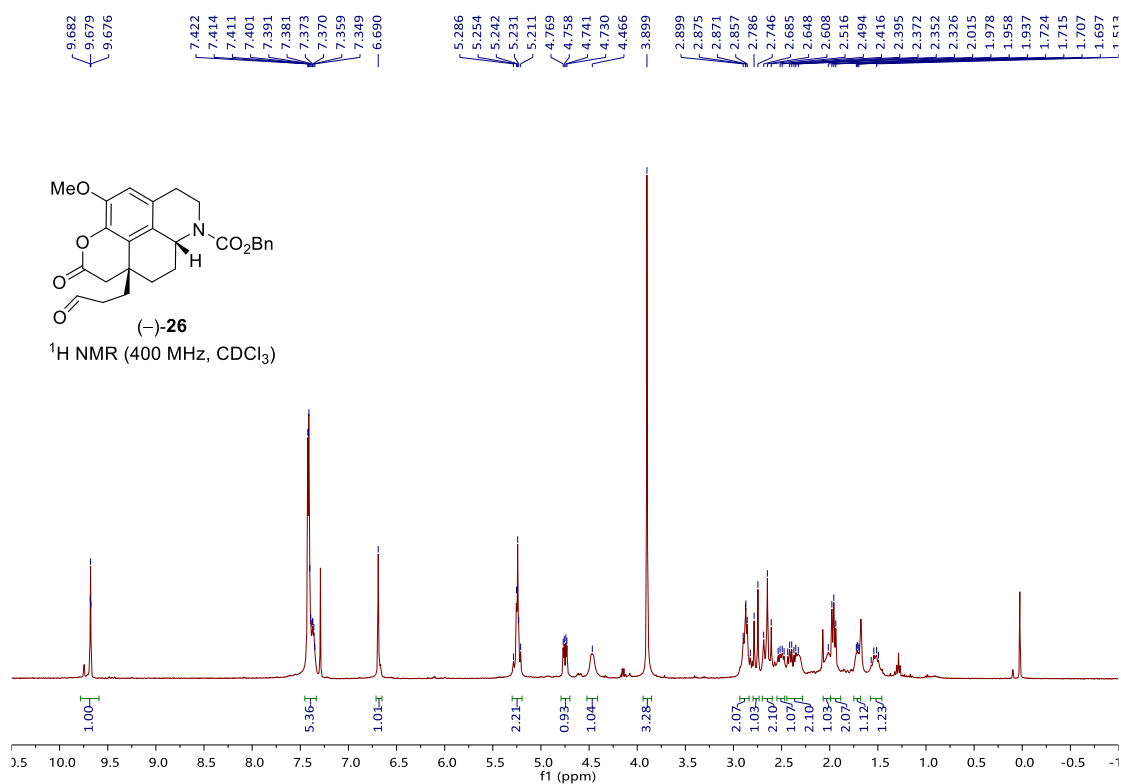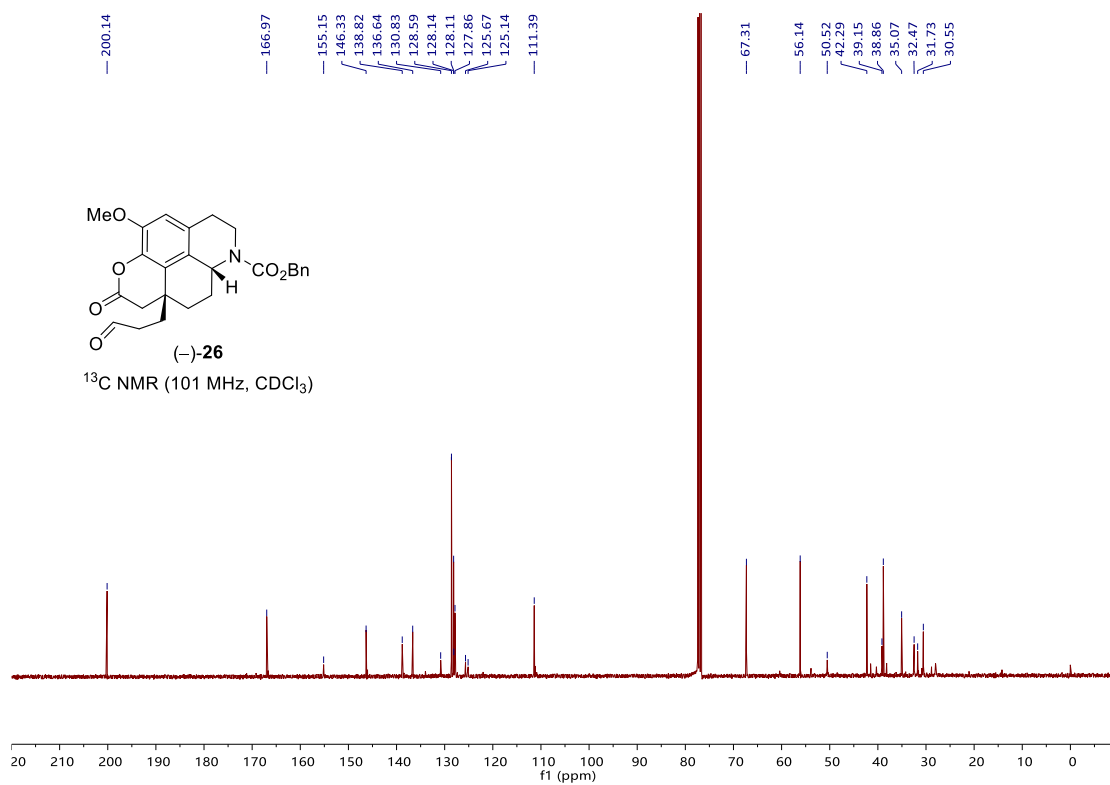



# Compound (-)-9

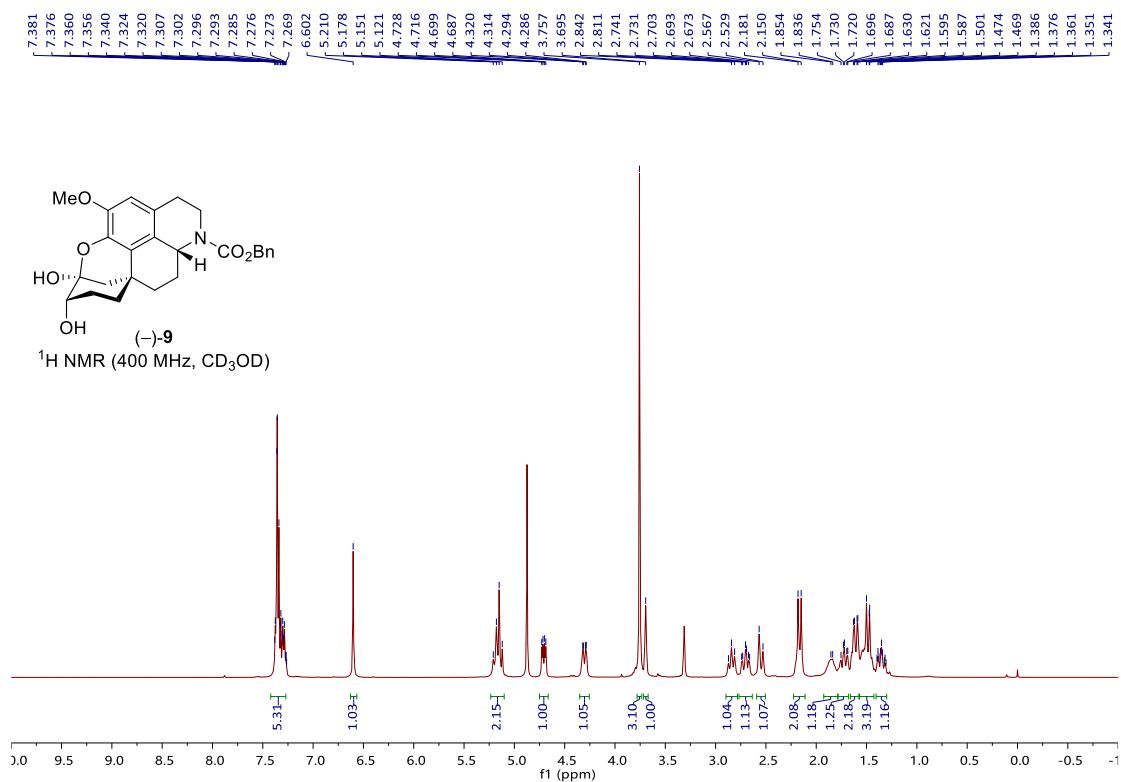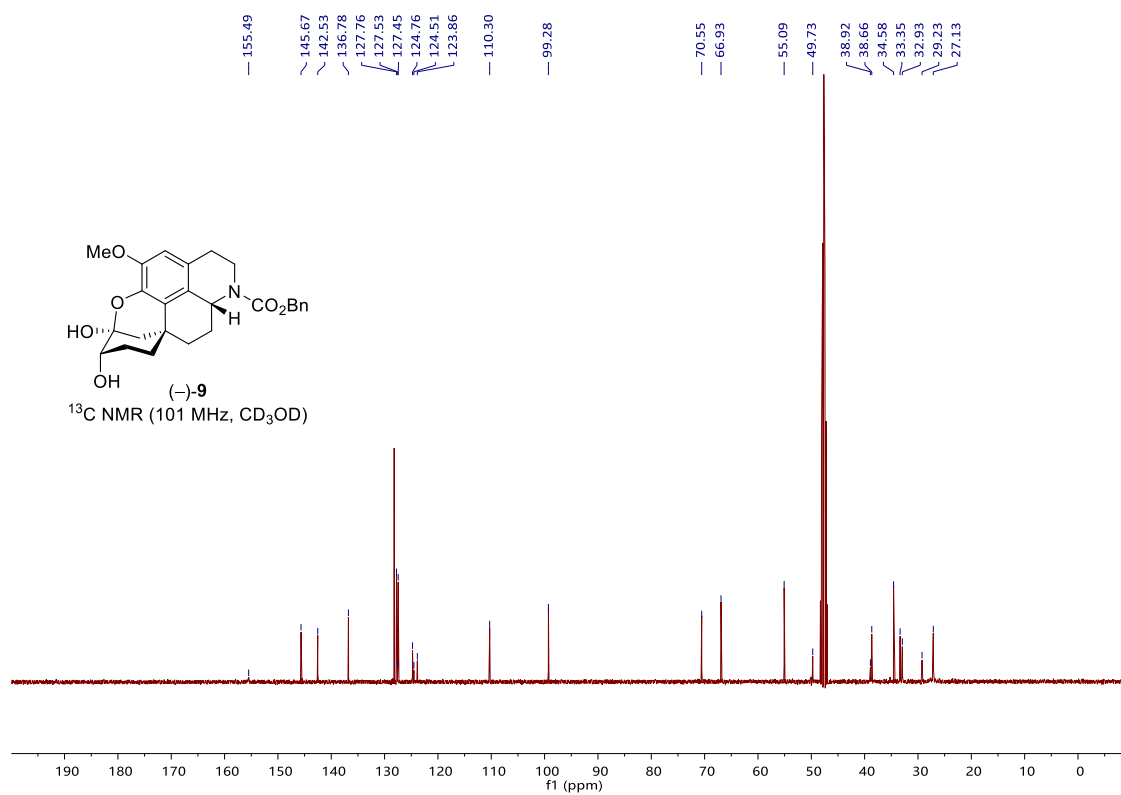

**Compound (-)-27 (with a minor diastereoisomer)**

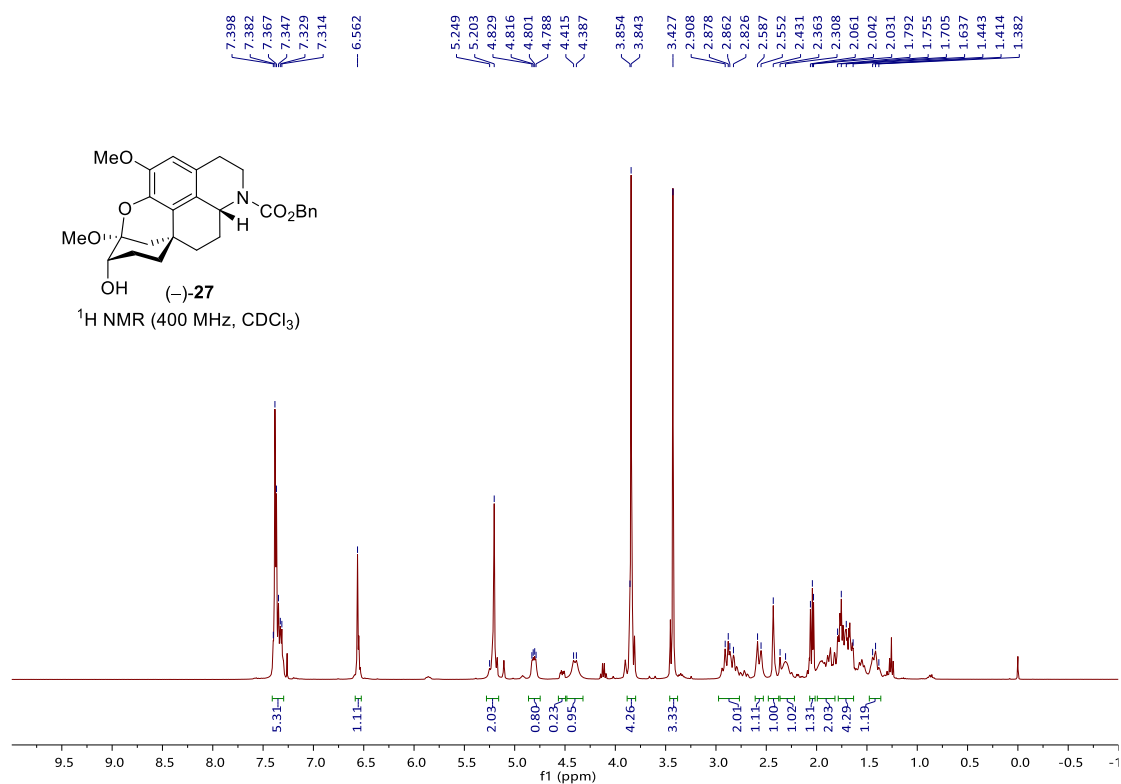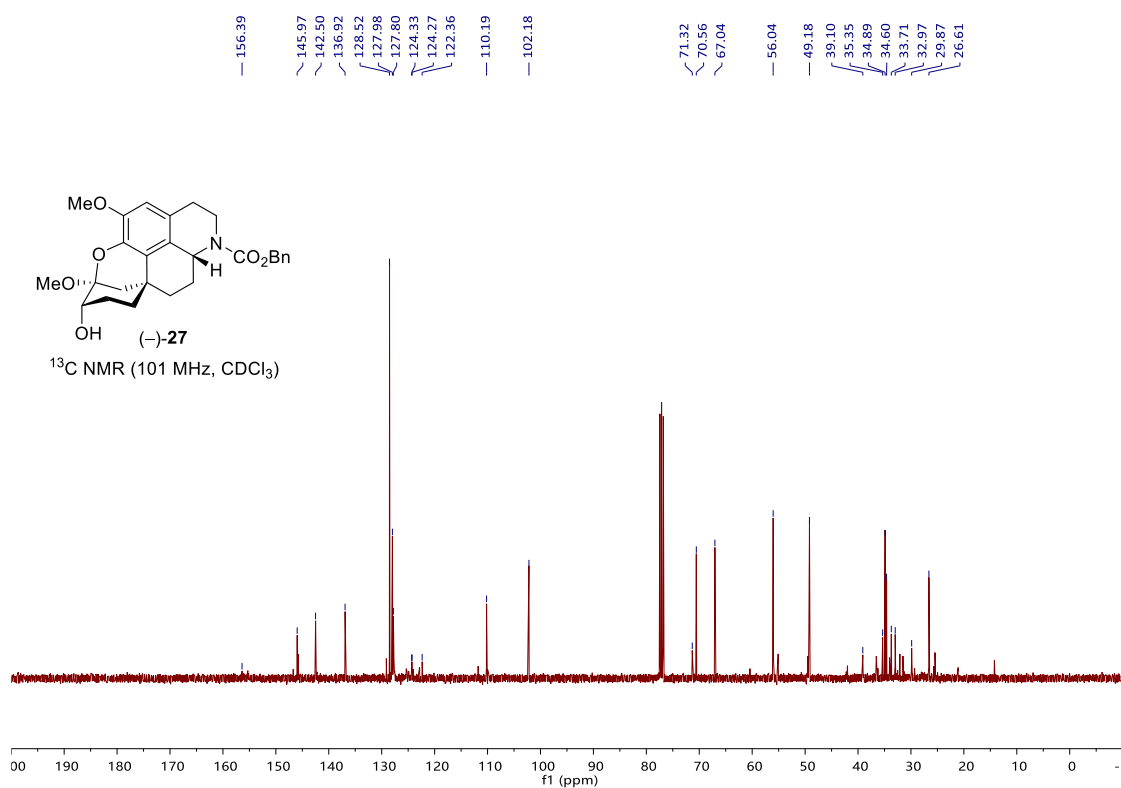

**(+)-Regeline (1)**

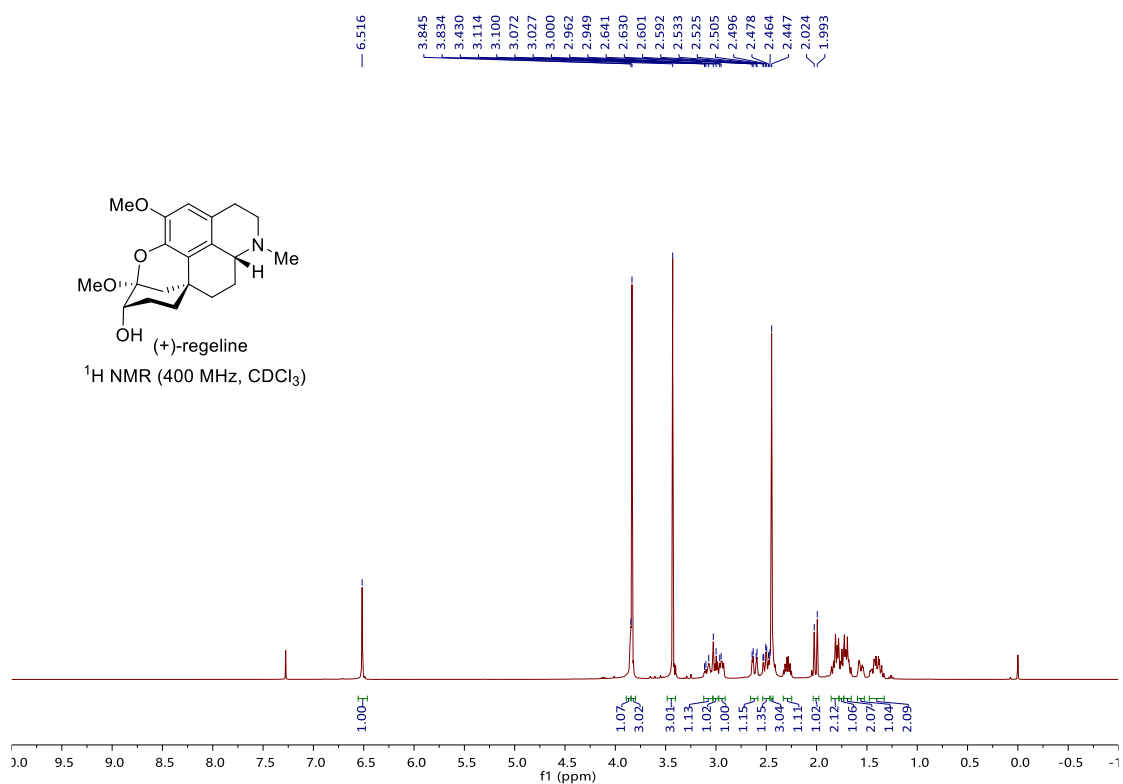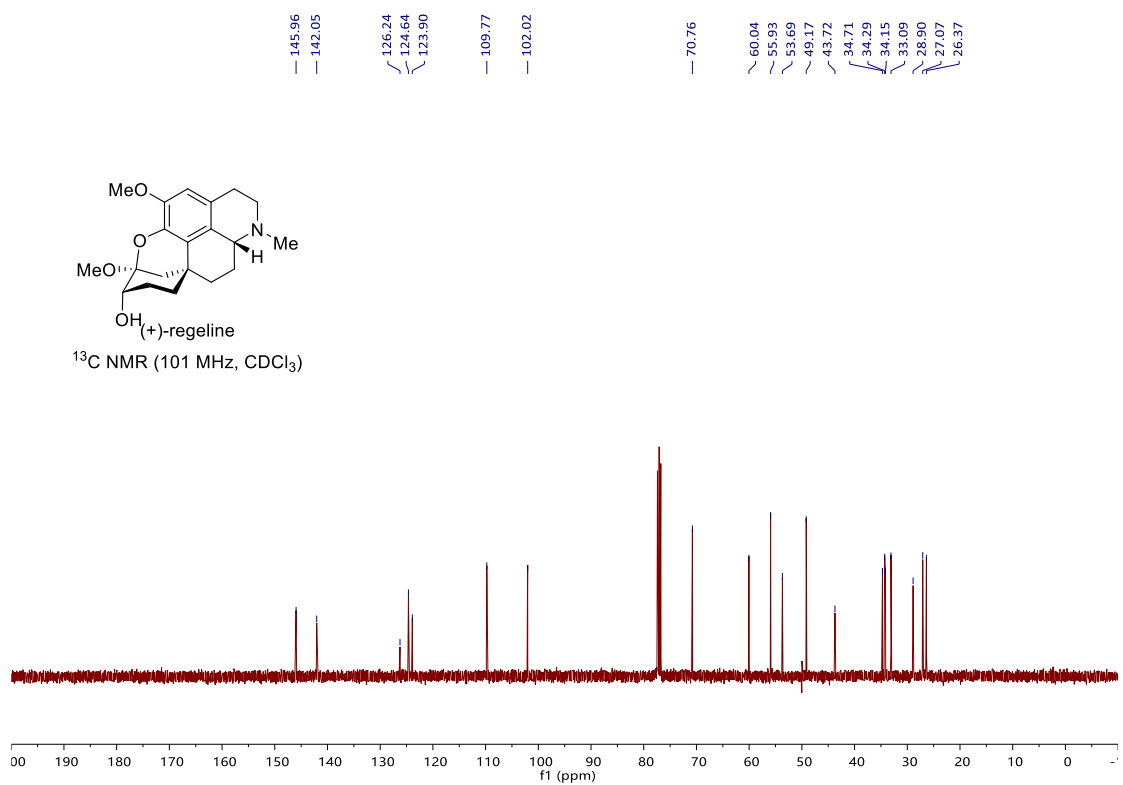

(+)-Regalamine (2)

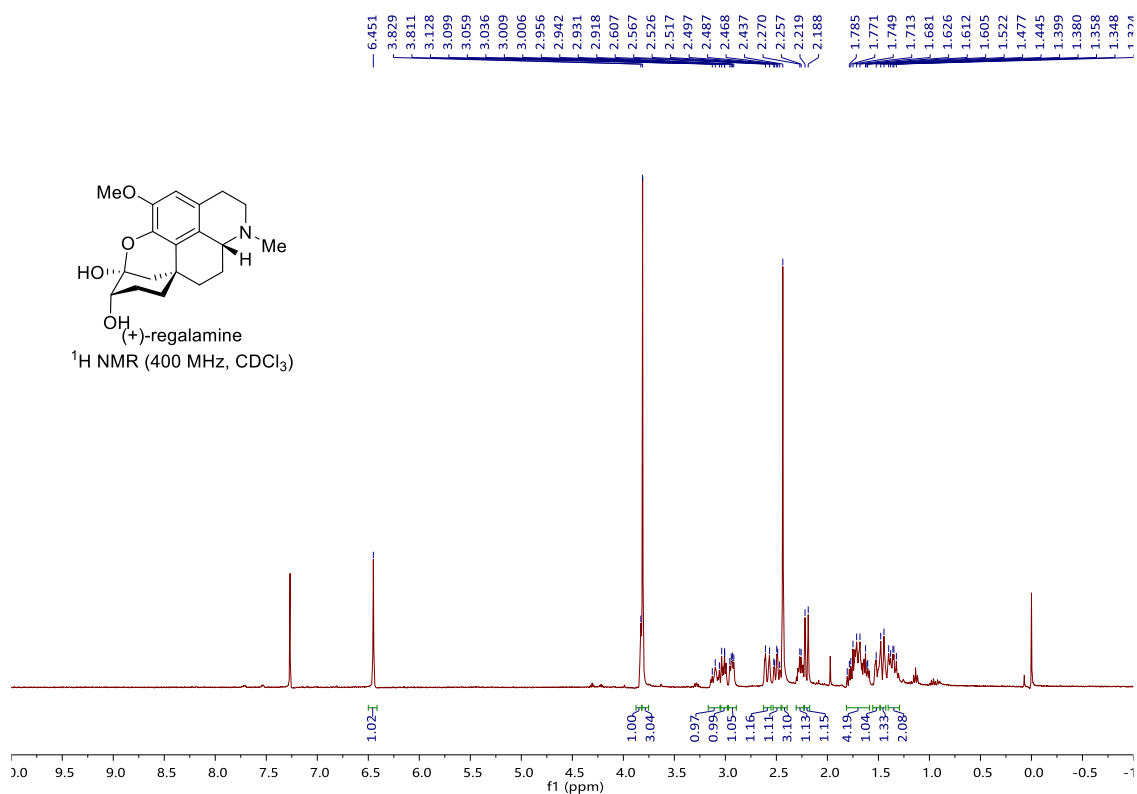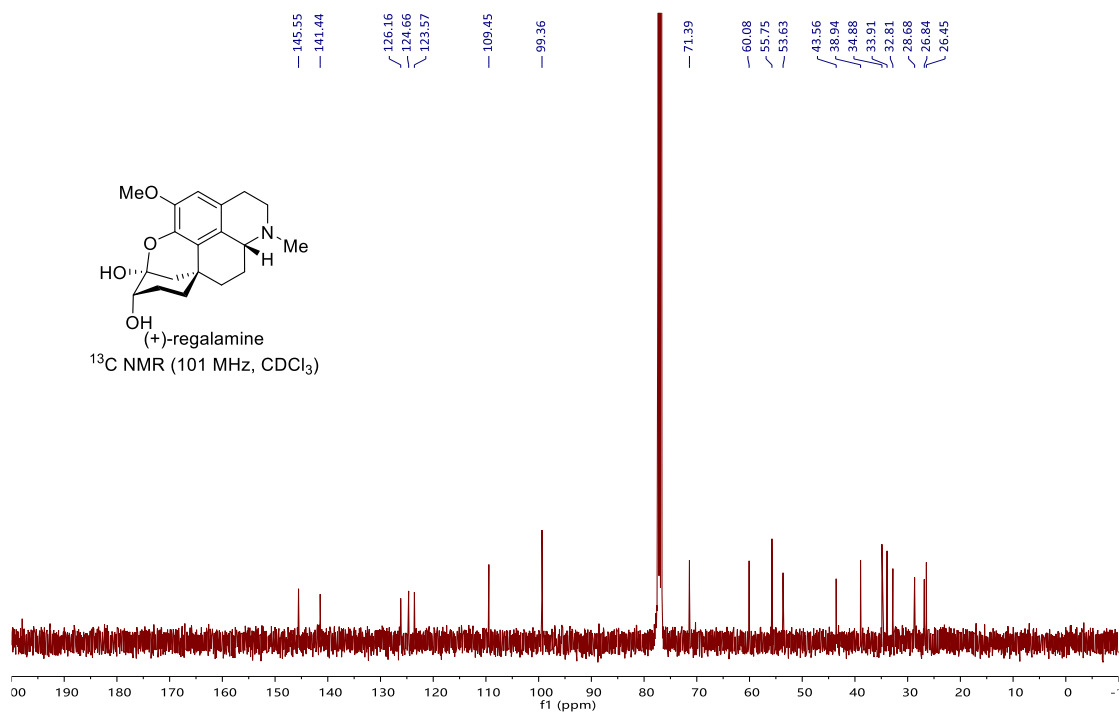

**(+)-Kesselridine (3)**

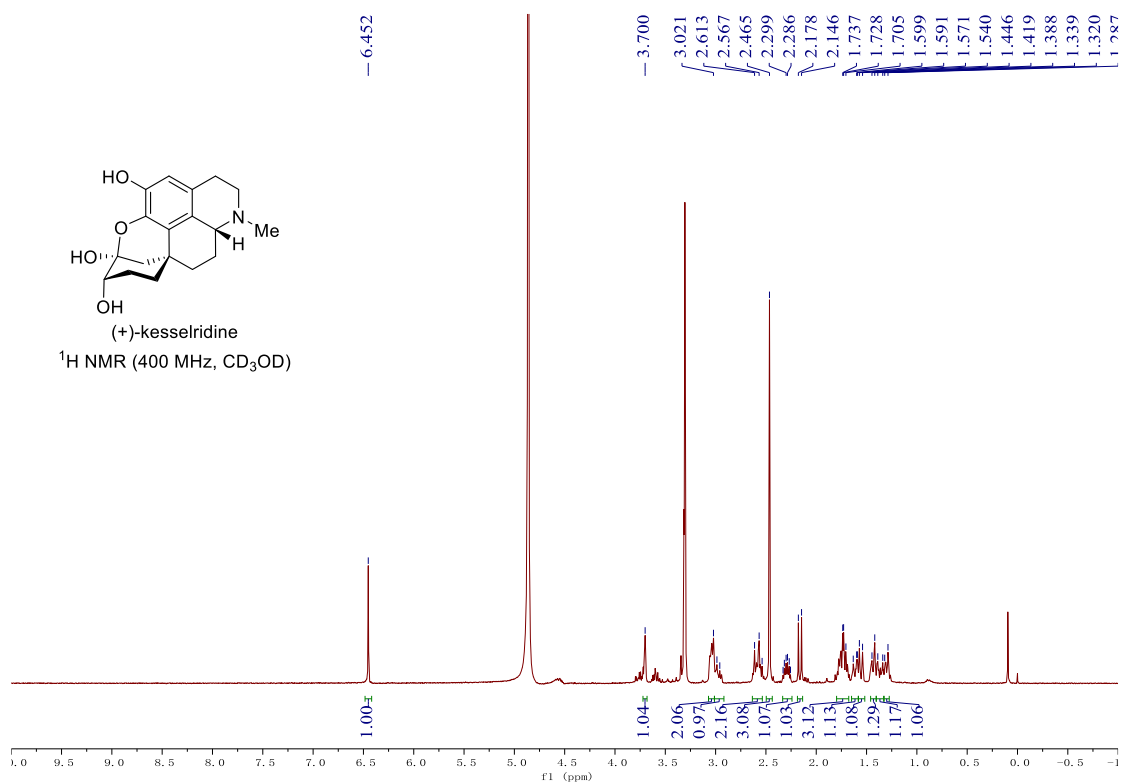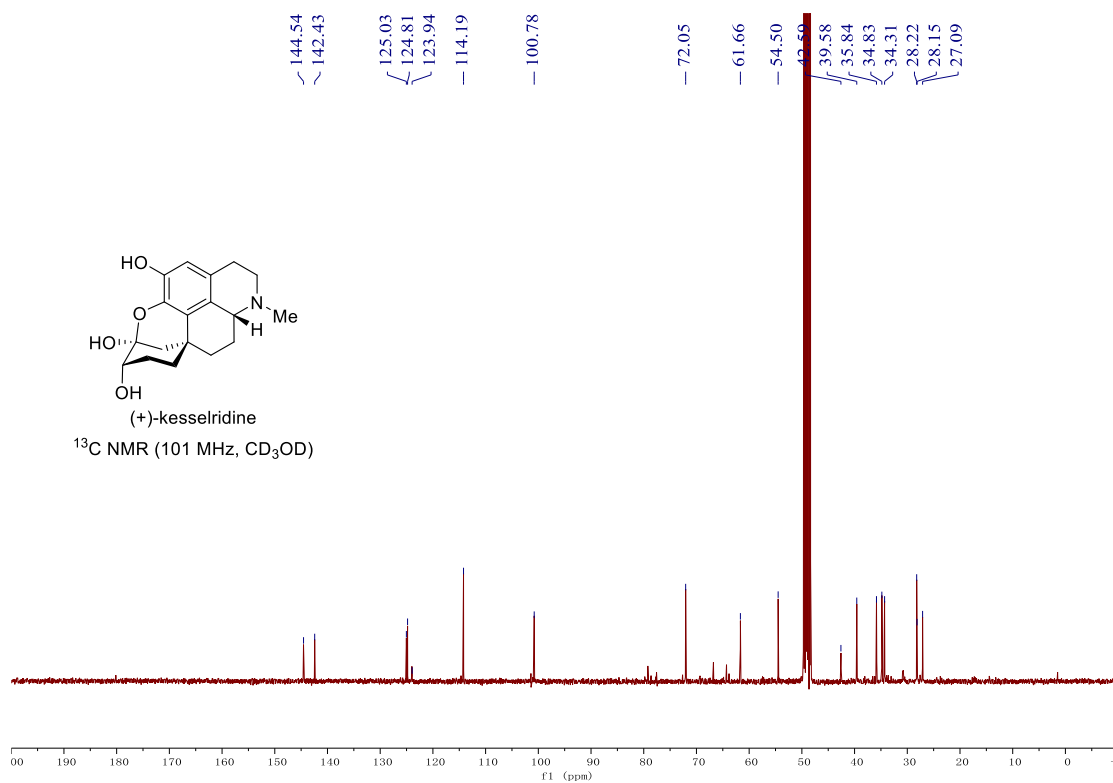

**(+)-Kesselringine (4)**

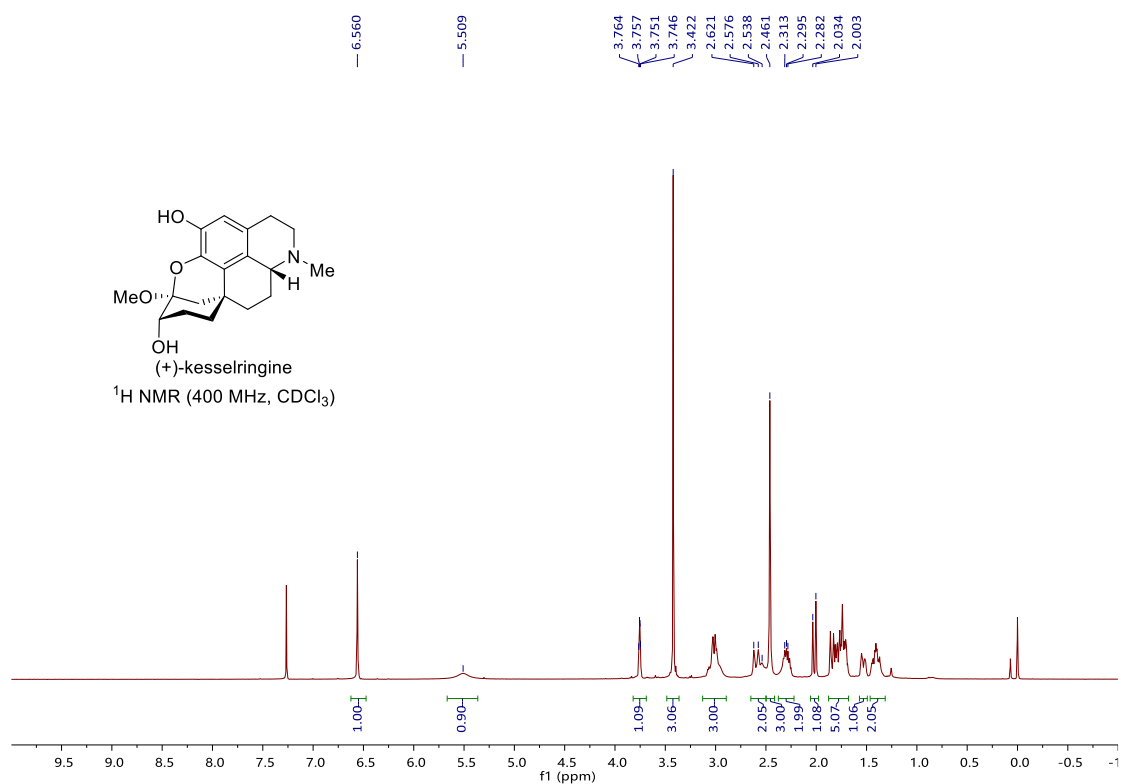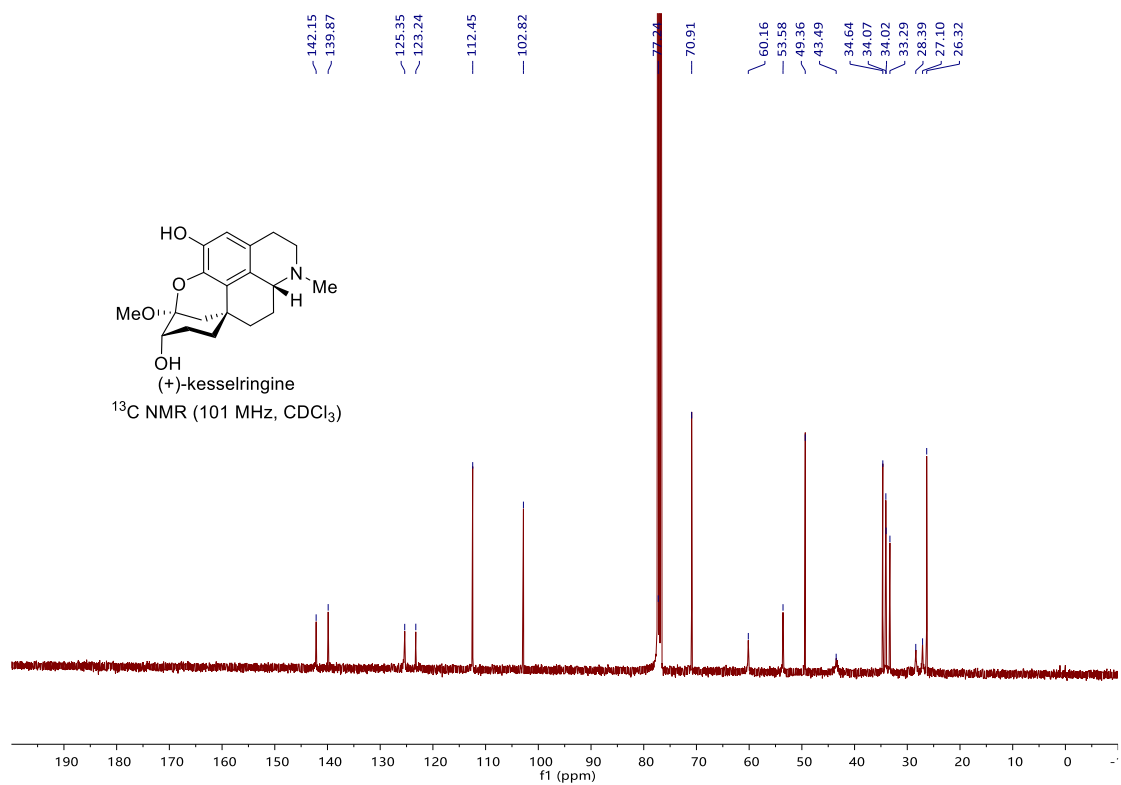

**(+)-Jolantidine (5)**

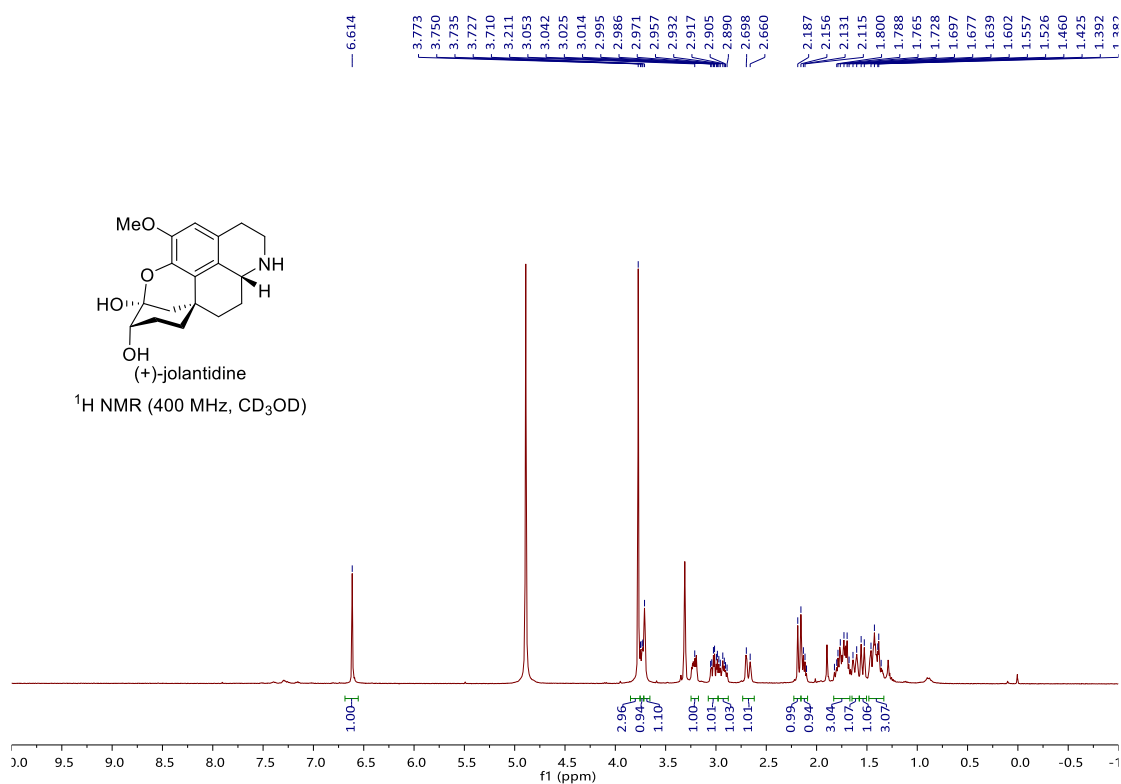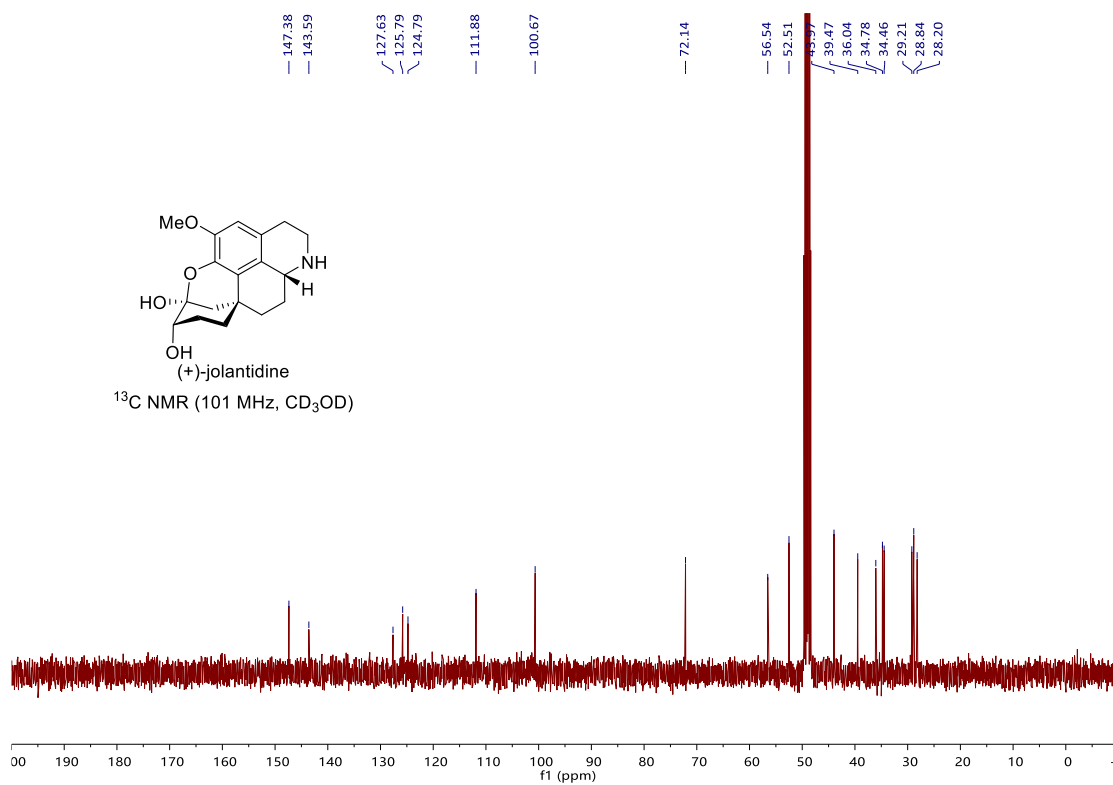

CN1CCC23C4C1CC5=C2C(=C(C=C5)OC)OC3C(C=C4)C  
 (+)-regelinine  
<sup>1</sup>H NMR (400 MHz, CDCl<sub>3</sub>)

| Chemical Shift (ppm) | Integration |
|----------------------|-------------|
| 6.513                | 1.00        |
| 3.830                | 3.04        |
| 3.745                | 1.00        |
| 3.732                | 3.03        |
| 3.717                | 2.09        |
| 3.703                | 1.04        |
| 3.413                | 1.98        |
| 3.085                | 1.19        |
| 3.056                | 3.00        |
| 3.044                | 1.08        |
| 3.016                | 1.01        |
| 2.987                | 1.07        |
| 2.973                | 3.10        |
| 2.924                | 1.99        |
| 2.911                | 2.04        |
| 2.899                |             |
| 2.885                |             |
| 2.671                |             |
| 2.637                |             |
| 2.626                |             |
| 2.597                |             |
| 2.589                |             |
| 2.523                |             |
| 2.502                |             |
| 2.492                |             |
| 2.475                |             |
| 2.463                |             |
| 2.439                |             |
| 2.274                |             |
| 2.171                |             |
| 2.165                |             |
| 2.140                |             |
| 2.133                |             |
| 1.890                |             |
| 1.857                |             |
| 1.760                |             |
| 1.741                |             |
| 1.726                |             |
| 1.706                |             |
| 1.566                |             |
| 1.563                |             |
| 1.535                |             |
| 1.530                |             |
| 1.518                |             |
| 1.495                |             |
| 1.485                |             |
| 1.415                |             |
| 1.392                |             |
| 1.360                |             |
| 1.349                |             |
| 1.337                |             |
| 1.297                |             |
| 1.286                |             |

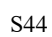



# F) HPLC Charts for (–)-13

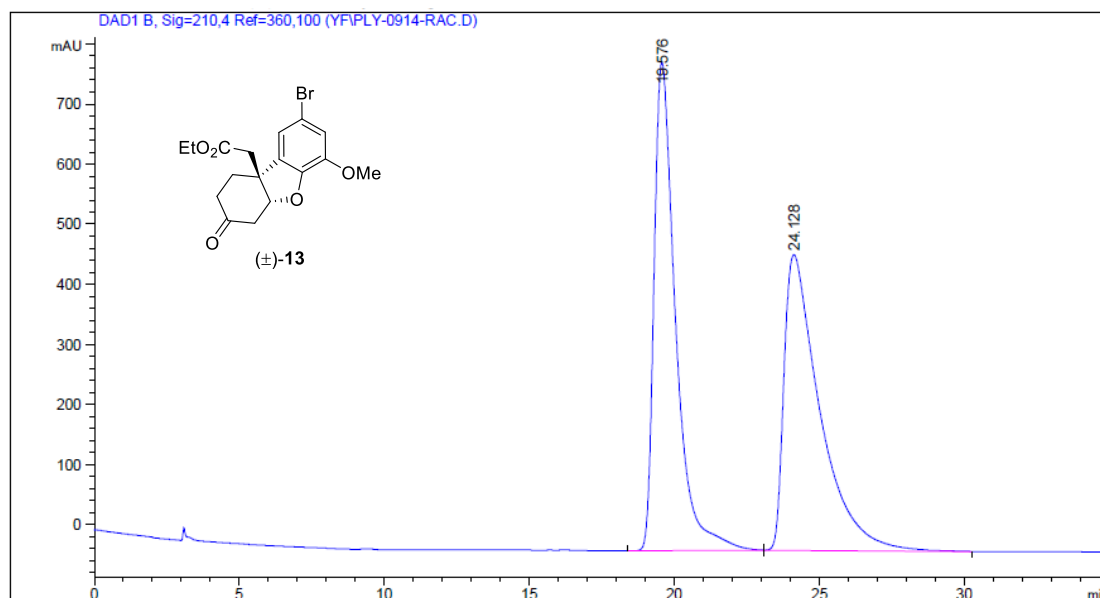

| Peak # | RetTime [min] | Type | Width [min] | Area [mAU*s] | Height [mAU] | Area %  |
|--------|---------------|------|-------------|--------------|--------------|---------|
| 1      | 19.576        | BB   | 0.7724      | 4.18316e4    | 812.86902    | 49.8041 |
| 2      | 24.128        | BB   | 1.2077      | 4.21606e4    | 492.00912    | 50.1959 |

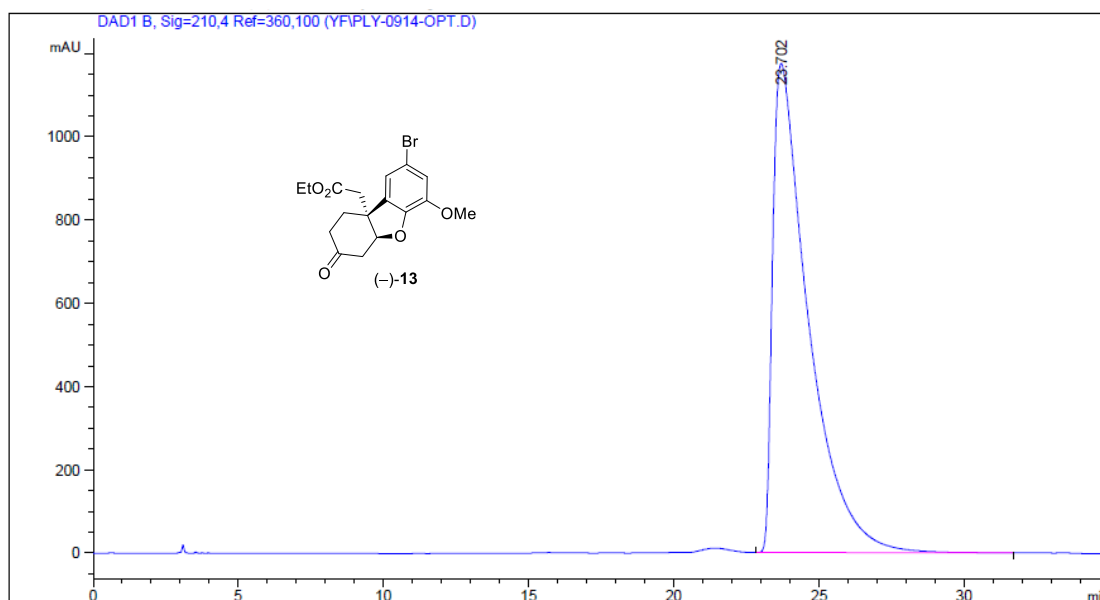

| Peak # | RetTime [min] | Type | Width [min] | Area [mAU*s] | Height [mAU] | Area %   |
|--------|---------------|------|-------------|--------------|--------------|----------|
| 1      | 23.702        | BB   | 1.2485      | 1.00802e5    | 1175.42114   | 100.0000 |
